# Supplementary material for: A genome-scale in vivo loss-of-function screen identifies Phf6 as a lineage-specific regulator of leukemia cell growth
Source: PubMed Central journal article supplement — Genes Dev. 2015 Mar 1;29(5):483–8. doi: 10.1101/gad.254151.114 (PMC4358400; doi:10.1101/gad.254151.114), 2015-03-01
Supplement: supp_29.5.483_Supplemental_Tables.pdf [file supp_29.5.483_Supplemental_Tables.pdf]

**Supplementary Table S1**

shRNAs that deplete *in vivo* and *in vitro*. shRNAs targeting annotated genes, predicted genes, and predicted proteins that deplete an average of four-fold *in vivo* and *in vitro* are listed. The average fold change of each shRNA *in vitro* and *in vivo* was normalized to the median fold change of all shRNAs in that setting.

| shRNA ID    | accession number | gene symbol   | gene name                                                               |
|-------------|------------------|---------------|-------------------------------------------------------------------------|
| V2MM_235925 | NM_026914        | 1500032L24Rik | hypothetical protein LOC69029                                           |
| V2MM_68910  | NM_029639        | 1600029D21Rik | placenta expressed transcript 1                                         |
| V2MM_105037 | NM_029309        | 1700010A17Rik | hypothetical protein LOC75495                                           |
| V2MM_104257 | NM_029336.1      | 1700022P22Rik | RIKEN cDNA 1700022P22 gene                                              |
| V2MM_99656  | NM_001163521.1   | 1700034F02Rik | RIKEN cDNA 1700034F02 gene                                              |
| V2MM_75928  | NM_029697        | 1700128F08Rik |                                                                         |
| V2MM_34899  | NM_024249        | 1810073N04Rik | hypothetical protein LOC72055                                           |
| V2MM_108828 | NM_026961        | 2200002J24Rik | hypothetical protein LOC69147                                           |
| V2MM_38299  | NM_172280        | 2210018M11Rik | EMSY protein                                                            |
| V2MM_204483 | NM_027155.1      | 2310061N02Rik | RIKEN cDNA 2310061N02 gene                                              |
| V2MM_206017 | NM_029741        | 2410127E16Rik | hypothetical protein LOC76787                                           |
| V2MM_262492 | NM_183119        | 2410141K09Rik | hypothetical protein LOC76803                                           |
| V2MM_162618 | NM_029366.2      | 2810422J05Rik | RIKEN cDNA 2810422J05 gene                                              |
| V2MM_78039  | NM_026063        | 2900010M23Rik | hypothetical protein LOC67267                                           |
| V2MM_46523  | NM_028455        | 3110043J09Rik | Rho GTPase activating protein 8                                         |
| V2MM_12203  | NM_026486        | 4432405B04Rik | tectonic 2                                                              |
| V2MM_73397  | NM_030069        | 4432416J03Rik | hypothetical protein LOC78252                                           |
| V2MM_106261 | NM_029425        | 4833424O15Rik | phosphatidic acid phosphatase type 2d                                   |
| V2MM_77999  | NM_025724        | 4921510H08Rik | hypothetical protein LOC66716                                           |
| V2MM_150781 | NM_001081029     | 4930420K17Rik | hypothetical protein LOC652925                                          |
| V2MM_103854 | XM_003085237.1   | 4930442E04Rik | RIKEN cDNA 4930442E04 gene                                              |
| V2MM_197564 | XM_001474786.1   | 4930470H14Rik | RIKEN cDNA 4930470H14 gene                                              |
| V2MM_204366 | NM_001081096     | 4930500O09Rik | hypothetical protein LOC75811                                           |
| V2MM_31717  | NM_172450        | 4930539E08Rik | hypothetical protein LOC207819                                          |
| V2MM_94203  | NM_183104        | 4931429L15Rik | hypothetical protein LOC74361                                           |
| V2MM_84694  | NM_028908        | 4933403G14Rik | hypothetical protein LOC74393                                           |
| V2MM_72714  | NM_025751        | 4933425L06Rik | hypothetical protein LOC66763                                           |
| V2MM_132926 | NM_028872        | 5730559C18Rik | RIKEN cDNA 5730559C18 gene                                              |
| V2MM_87859  | NM_175261        | 5730596B20Rik |                                                                         |
| V2MM_87734  | NM_175234        | 6230409E13Rik | hypothetical protein LOC76132                                           |
| V2MM_13057  | NM_134022        | 6330403K07Rik | hypothetical protein LOC103712                                          |
| V2MM_262473 | NM_178796        | A530064D06Rik | hypothetical protein LOC328830                                          |
| V2MM_133986 | NM_175437        | A530088I07Rik | RIKEN cDNA A530088I07 gene                                              |
| V2MM_71636  | NM_026276        | Aasdhppt      | aminoadipate-semialdehyde dehydrogenase-phosphopantetheinyl transferase |
| V2MM_108916 | NM_009596        | Abpa          | androgen binding protein alpha                                          |
| V2MM_87207  | NM_001039959     | Ahnak         | AHNAK nucleoprotein                                                     |
| V2MM_55182  | NM_009650        | Akap3         | A-kinase anchor protein 3                                               |

|             |                |               |                                                                           |
|-------------|----------------|---------------|---------------------------------------------------------------------------|
| V2MM_74366  | NM_007426      | Angpt2        | angiopoietin 2                                                            |
| V2MM_211486 | NM_145154      | Angptl6       | angiopoietin-related protein 5                                            |
| V2MM_104809 | NM_177268.4    | Ankrd16       | ankyrin repeat domain 16                                                  |
| V2MM_20637  | NM_144790      | Ankrd33       | ankyrin repeat domain 33                                                  |
| V2MM_11962  | NM_018758      | Apba3         | amyloid beta (A4) precursor protein-binding, family A, member 3           |
| V2MM_96124  | NM_001163621.1 | Apol6         | apolipoprotein L 6                                                        |
| V2MM_193277 | NM_145985      | Arcn1         | archain 1                                                                 |
| V2MM_104836 | NM_001081364   | Arhgap21      | Rho GTPase activating protein 21                                          |
| V2MM_33730  | NM_146161      | Arhgap24      | Rho GTPase activating protein 24                                          |
| V2MM_12436  | NM_029847      | Arsk          | arylsulfatase K                                                           |
| V2MM_92171  | NM_178662      | Atcay         | ataxia, cerebellar, Cayman type homolog                                   |
| V2MM_134016 | NM_001002897.3 | Atg9b         | ATG9 autophagy related 9 homolog B ( <i>S. cerevisiae</i> ) (Atg9b), mRNA |
| V2MM_53606  | NM_009735      | B2m           | beta-2-microglobulin                                                      |
| V2MM_57262  | NM_177188      | B430209F14Rik |                                                                           |
| V2MM_100866 | NM_027404      | Bag5          | BCL2-associated athanogene 5                                              |
| V2MM_23748  | NM_130452      | Bbox1         | gamma-butyrobetaine dioxygenase                                           |
| V2MM_75586  | NM_026116      | Bbs2          | Bardet-Biedl syndrome 2 homolog                                           |
| V2MM_57688  | NM_021486      | Bcmo1         | beta-carotene 15,15'-monooxygenase                                        |
| V2MM_12345  | NM_027371      | Bxdc5         | RNA processing factor 1                                                   |
| V2MM_69834  | NM_009777      | C1qb          | complement component 1, q subcomponent, B chain                           |
| V2MM_221502 | NM_172924      | C230081A13Rik | hypothetical protein LOC244895                                            |
| V2MM_76759  | NM_011274      | C80913        | expressed sequence C80913                                                 |
| V2MM_215233 | NM_001195094.1 | Ccdc42b       | coiled-coil domain containing 42B                                         |
| V2MM_10641  | NM_026439      | Ccdc80        | steroid-sensitive protein 1                                               |
| V2MM_95464  | NM_001081291   | Ccdc88b       | coiled-coil domain containing 88B                                         |
| V2MM_72623  | NM_009838      | Cct6a         | chaperonin subunit 6a (zeta)                                              |
| V2MM_71106  | NM_009860      | Cdc25c        | cell division cycle 25 homolog C ( <i>S. pombe</i> )                      |
| V2MM_63592  | NM_009871      | Cdk5r1        | cyclin-dependent kinase 5, regulatory subunit (p35) 1                     |
| V2MM_133014 | NM_001081363   | Cenpf         | leucine, glutamic acid, lysine family 1 protein                           |
| V2MM_50794  | NM_172723      | Centa1        | centaurin, alpha 1                                                        |
| V2MM_95511  | NM_198019      | Cep78         | IP63 protein                                                              |
| V2MM_241460 | NM_145475      | Cerk          | ceramide kinase                                                           |
| V2MM_203726 | NM_199055      | Chst9         | carbohydrate (N-acetylgalactosamine 4-0) sulfotransferase 9               |
| V2MM_61861  | NM_053155      | Clmn          | calmin                                                                    |
| V2MM_68821  | NM_026036      | Cmtm6         | chemokine-like factor superfamily 6                                       |

|             |                |               |                                                             |
|-------------|----------------|---------------|-------------------------------------------------------------|
| V2MM_85264  | NM_133850      | Commd7        | COMM domain containing 7                                    |
| V2MM_35603  | NM_144874      | Cox15         | COX15 homolog, cytochrome c oxidase assembly protein        |
| V2MM_194685 | NM_001013391   | Cpsf6         | cleavage and polyadenylation specific factor 6              |
| V2MM_197085 | NM_001013391   | Cpsf6         | cleavage and polyadenylation specific factor 6              |
| V2MM_70761  | NM_030004      | Cryl1         | crystallin, lambda 1                                        |
| V2MM_82627  | NM_009968      | Cryz          | crystallin, zeta                                            |
| V2MM_102251 | NM_001081391   | Csmd3         | CUB and Sushi multiple domains 3                            |
| V2MM_28500  | NM_146087      | Csnk1a1       | casein kinase 1, alpha 1                                    |
| V2MM_73661  | NM_013808      | Csrp3         | cysteine and glycine-rich protein 3                         |
| V2MM_66196  | NM_133196      | Cstf2         | cleavage stimulation factor, 3'pre-RNA subunit 2            |
| V2MM_38289  | NM_173012      | D030041N04Rik | hypothetical protein LOC270035                              |
| V2MM_77935  | NM_176997      | D130020L05Rik |                                                             |
| V2MM_52489  | NM_028523      | Dcbld2        | discoidin, CUB and LCCL domain containing 2                 |
| V2MM_93702  | NM_181683      | Defb37        | defensin beta 37                                            |
| V2MM_33218  | NM_026866      | Disp1         | dispatched homolog 1                                        |
| V2MM_62817  | NM_001163513.1 | Dlg5          | discs, large homolog 5 (Drosophila)                         |
| V2MM_196126 | NM_183312      | Dmn           | desmuslin                                                   |
| V2MM_58241  | NM_001038619   | Dnm3          | dynamamin 3                                                 |
| V2MM_43670  | NM_031843      | Dpp7          | dipeptidylpeptidase 7                                       |
| V2MM_82668  | NM_010076      | Drd1a         | dopamine receptor D1A                                       |
| V2MM_11009  | NM_025947      | Dynlrb1       | dynein, cytoplasmic, light chain 2A                         |
| V2MM_191352 | XM_003085558.1 | E030019B06Rik | RIKEN cDNA E030019B06 gene                                  |
| V2MM_88995  | NM_175540      | Eda2r         | X linked ectodysplasin receptor                             |
| V2MM_90509  | NM_177808      | EG328231      | hypothetical protein LOC328231                              |
| V2MM_90646  | NM_177833      | EG329070      | hypothetical protein LOC329070                              |
| V2MM_95054  | NM_183313      | EG330602      | predicted gene, EG330602                                    |
| V2MM_262192 | NM_198635      | EG333669      | hypothetical protein LOC333669                              |
| V2MM_221203 | NM_001034902   | EG545861      | hypothetical protein LOC545861                              |
| V2MM_240206 | NM_026114      | Eif2s1        | eukaryotic translation initiation factor 2, subunit 1 alpha |
| V2MM_35554  | NM_144958      | Eif4a1        | eukaryotic translation initiation factor 4A1                |
| V2MM_225271 | NM_181582      | Eif5a         | eukaryotic translation initiation factor 5A                 |
| V2MM_104414 | NM_198303      | Eif5b         | eukaryotic translation initiation factor 5B                 |
| V2MM_110275 | NM_001037298.1 | Fam38a        | family with sequence similarity 38, member A                |
| V2MM_96180  | NM_001081034   | Fbxo11        | F-box protein 11                                            |
| V2MM_11455  | NM_175127      | Fbxo28        | F-box protein 28                                            |

|             |                |         |                                                                                |
|-------------|----------------|---------|--------------------------------------------------------------------------------|
| V2MM_134183 | NM_199068      | Foxk1   | forkhead box K1                                                                |
| V2MM_70094  | NM_008073      | Gabrg2  | gamma-aminobutyric acid (GABA-A) receptor, subunit gamma 2                     |
| V2MM_68176  | NM_008078      | Gad2    | glutamic acid decarboxylase 2                                                  |
| V2MM_70771  | NM_153569      | Gak     | cyclin G associated kinase                                                     |
| V2MM_65067  | NM_008097      | Gcdh    | glutaryl-Coenzyme A dehydrogenase                                              |
| V2MM_83522  | NM_019506      | Gdf2    | growth differentiation factor 2                                                |
| V2MM_3256   | NM_020014      | Gfra4   | glial cell line derived neurotrophic factor family receptor alpha 4            |
| V2MM_178140 | NM_001177832.1 | Gm10324 | predicted gene 10324                                                           |
| V2MM_239707 | XM_001476794.1 | Gm6408  | predicted gene 6408                                                            |
| V2MM_117894 | XM_003085977.1 | Gm8973  | predicted gene 8973                                                            |
| V2MM_197660 | NM_001033234   | Gm9     | hypothetical protein LOC194854                                                 |
| V2MM_161764 | XR_106334.1    | Gm9944  | predicted gene 9944                                                            |
| V2MM_105919 | NM_001033300   | Gmps    | guanine monphosphate synthetase                                                |
| V2MM_64588  | NM_026367      | Gpatch2 | G patch domain containing 2                                                    |
| V2MM_157689 | NM_001033351.1 | Grin3a  | glutamate receptor ionotropic, NMDA3A                                          |
| V2MM_38304  | NM_148928      | Gtf3c5  | general transcription factor III polypeptide 5                                 |
| V2MM_11745  | NM_025942      | Gtpbp9  | GTP-binding protein PTD004                                                     |
| V2MM_120803 | NM_178724.4    | Harbi1  | harbinger transposase derived 1                                                |
| V2MM_73994  | NM_010423      | Hey1    | hairy/enhancer-of-split related with YRPW motif 1                              |
| V2MM_161933 | NM_177873.2    | Hfm1    | HFM1, ATP-dependent DNA helicase homolog ( <i>S. cerevisiae</i> ) (Hfm1), mRNA |
| V2MM_16105  | NM_008246      | Hiat1   | hippocampus abundant gene transcript 1                                         |
| V2MM_108487 | NM_026489      | Hormad1 | HORMA domain containing 1                                                      |
| V2MM_69844  | NM_010477      | Hspd1   | heat shock protein 1 (chaperonin)                                              |
| V2MM_76981  | NM_010510      | Ifnb1   | interferon beta, fibroblast                                                    |
| V2MM_196659 | NM_177915      | Igsf1   | immunoglobulin superfamily, member 1                                           |
| V2MM_9224   | NM_018738      | Igtp    | interferon gamma induced GTPase                                                |
| V2MM_213479 | NM_026748      | Ints1   | integrator complex subunit 1                                                   |
| V2MM_71157  | NM_176843      | Ints5   | integrator complex subunit 5                                                   |
| V2MM_187402 | NM_029665      | Ipo11   | importin 11                                                                    |
| V2MM_69084  | NM_026090      | Iqcf4   | IQ motif containing F4                                                         |
| V2MM_110739 | NM_030068.1    | Iqch    | IQ motif containing H                                                          |
| V2MM_72905  | NM_010576      | Itga4   | integrin alpha 4                                                               |
| V2MM_114808 | NM_028708.1    | Jakmip3 | janus kinase and microtubule interacting protein 3                             |
| V2MM_70593  | NM_025734      | Kcng4   | voltage-gated potassium channel subunit Kv6.3                                  |

|             |                |              |                                                                      |
|-------------|----------------|--------------|----------------------------------------------------------------------|
| V2MM_88533  | NM_175429      | Kctd12b      | potassium channel tetramerisation domain containing 12b              |
| V2MM_47352  | NM_177155      | Klri2        | killer cell lectin-like receptor family I member 2                   |
| V2MM_196150 | NM_133357      | Krt75        | keratinocyte associated protein 1                                    |
| V2MM_27480  | NM_146063      | Krt79        | keratin 6L                                                           |
| V2MM_26366  | NM_030717      | Lactb        | lactamase, beta                                                      |
| V2MM_16964  | NM_008479      | Lag3         | lymphocyte-activation gene 3                                         |
| V2MM_220069 | NM_025410      | Lage3        | Eso3 protein                                                         |
| V2MM_66575  | NM_172842      | Lax1         | lymphocyte transmembrane adaptor 1                                   |
| V2MM_72729  | NM_025501      | Lce3b        | small proline rich-like 6A                                           |
| V2MM_79705  | NM_010702      | Lect2        | leukocyte cell-derived chemotaxin 2                                  |
| V2MM_73847  | NM_023063      | Lima1        | epithelial protein lost in neoplasm                                  |
| V2MM_226059 | NM_175186      | Lin9         | type I interferon receptor beta chain-associated                     |
| V2MM_84033  | NM_026719      | Lmbrd1       | liver regeneration p-53 related protein                              |
| V2MM_219092 | NM_010722      | Lmnb2        | lamin B2                                                             |
| V2MM_202323 | XM_001477593.1 | LOC100047183 | protein AHNAK2-like                                                  |
| V2MM_129393 | XM_003084762.1 | LOC100502846 | low-density lipoprotein receptor-related protein 2-like              |
| V2MM_239355 | XM_003085439.1 | LOC100504155 | zinc finger protein 709-like                                         |
| V2MM_127911 | XM_003086807.1 | LOC100505014 | 60S ribosomal protein L15-like                                       |
| V2MM_127911 | XM_003086807.1 | LOC100505014 | 60S ribosomal protein L15-like                                       |
| V2MM_118043 | XM_003086031.1 | LOC100505223 | carbonyl reductase [NADPH] 1-like                                    |
| V2MM_214440 | NM_199302      | Lrsam1       | leucine rich repeat and sterile alpha motif containing 1             |
| V2MM_84475  | NM_028185      | Lsm11        | U7 snRNA-associated Sm-like protein Lsm11                            |
| V2MM_36285  | NM_008529      | Ly6e         | lymphocyte antigen 6 complex, locus E                                |
| V2MM_188041 | NM_010367      | Magi1        | membrane associated guanylate kinase, WW and PDZ domain containing 1 |
| V2MM_86939  | NM_174857      | Mamdc2       | MAM domain containing 2                                              |
| V2MM_11301  | NM_020007      | Mbnl1        | muscleblind-like 1                                                   |
| V2MM_5058   | NM_026656      | Mcoln2       | mucolipin 2                                                          |
| V2MM_38768  | NM_008575      | Mdm4         | transformed mouse 3T3 cell double minute 4                           |
| V2MM_12565  | NM_020000      | Med8         | mediator of RNA polymerase II transcription, subunit 8 homolog       |
| V2MM_8841   | NM_145385      | Mlf2         | myeloid leukemia factor 2 homolog                                    |
| V2MM_109034 | NM_205810      | Mrgprb1      | MAS-related GPR, member B1                                           |

|             |              |                |                                                      |
|-------------|--------------|----------------|------------------------------------------------------|
| V2MM_76927  | NM_025500    | Mrpl37         | mitochondrial ribosomal protein L37                  |
| V2MM_64548  | NM_025440    | Mrps16         | mitochondrial ribosomal protein S16                  |
| V2MM_159268 | NM_054043.3  | Msi2           | Musashi homolog 2 (Drosophila) (Msi2), mRNA          |
| V2MM_20575  | NM_144941    | Mtap7d1        | proline arginine rich coiled coil 1                  |
| V2MM_197048 | NM_001081219 | Myo1a          | myosin IA                                            |
| V2MM_107373 | NM_019438.1  | Ncapg          | non-SMC condensin I complex, subunit G               |
| V2MM_68179  | NM_025597    | Ndufb3         | NADH dehydrogenase (ubiquinone) 1 beta subcomplex 3  |
| V2MM_10830  | NM_025843    | Ndufb7         | NADH dehydrogenase (ubiquinone) 1 beta subcomplex, 7 |
| V2MM_205185 | NM_027707    | Nipbl          | delangin                                             |
| V2MM_33053  | NM_008703    | Nmbr           | neuromedin B receptor                                |
| V2MM_88662  | NM_175460    | Nmnat2         | nicotinamide nucleotide adenylyltransferase 2        |
| V2MM_100372 | NM_001008421 | Nol10          | nucleolar protein 10                                 |
| V2MM_197105 | NM_001081350 | Nol8           | nucleolar protein 8                                  |
| V2MM_188988 | NM_022979    | Nup98          | nucleoporin 98                                       |
| V2MM_43136  | NM_130869    | OG2            | OG2 homeobox                                         |
| V2MM_219820 | NM_146844    | Olfr1107       | olfactory receptor 1107                              |
| V2MM_86243  | NM_146659    | Olfr1136       | olfactory receptor 1136                              |
| V2MM_78640  | NM_146641    | Olfr1164       | olfactory receptor 1164                              |
| V2MM_75028  | NM_146902    | Olfr1221       | olfactory receptor 1221                              |
| V2MM_68358  | NM_146851    | Olfr295        | olfactory receptor 295                               |
| V2MM_232054 | NM_207158.1  | Olfr427        | olfactory receptor 427                               |
| V2MM_63767  | NM_146773    | Olfr508        | olfactory receptor 508                               |
| V2MM_48609  | NM_147079    | Olfr547        | olfactory receptor 547                               |
| V2MM_128554 | NM_207621    | Olfr553        | olfactory receptor 553                               |
| V2MM_52402  | NM_147091    | Olfr568        | olfactory receptor 568                               |
| V2MM_61534  | NM_147050    | Olfr659        | olfactory receptor 659                               |
| V2MM_69575  | NM_146749    | Olfr875        | olfactory receptor 875                               |
| V2MM_72624  | NM_146871    | Olfr898        | olfactory receptor 898                               |
| V2MM_262327 | NM_205822    | Omt2b          | oocyte maturation, beta                              |
| V2MM_114571 | NM_001013783 | OTTMUSG0000000 | hypothetical protein LOC432552                       |
| V2MM_72936  | NM_011060    | Padi3          | peptidyl arginine deiminase, type III                |
| V2MM_40608  | NM_177326    | Pak2           | p21-activated kinase 2                               |
| V2MM_76321  | NM_021567    | Pcbp4          | poly(rC) binding protein 4                           |
| V2MM_77687  | NM_053143    | Pcdhb18        | protocadherin beta 18                                |
| V2MM_74408  | NM_053145    | Pcdhb20        | protocadherin beta 20                                |
| V2MM_19979  | NM_011995    | Pclo           | piccolo (presynaptic cytomatrix protein)             |
| V2MM_120553 | NM_001081033 | Pde11a         | phosphodiesterase 11A                                |
| V2MM_190814 | NM_199299    | Phf15          | PHD finger protein 15                                |

|             |                |          |                                                                                                                          |
|-------------|----------------|----------|--------------------------------------------------------------------------------------------------------------------------|
| V2MM_46709  | NM_008847      | Pip5k1a  | phosphatidylinositol-4-phosphate 5-kinase, type 1 alpha                                                                  |
| V2MM_50791  | NM_016927      | Pkd2l2   | polycystic kidney disease 2-like 2                                                                                       |
| V2MM_79027  | NM_011123      | Plp1     | proteolipid protein 1                                                                                                    |
| V2MM_41163  | NM_021451      | Pmaip1   | phorbol-12-myristate-13-acetate-induced protein 1                                                                        |
| V2MM_11945  | NM_134021      | Pnpo     | pyridoxine 5'-phosphate oxidase                                                                                          |
| V2MM_47797  | NM_153798      | Polr2b   | polymerase (RNA) II (DNA directed) polypeptide B                                                                         |
| V2MM_9232   | NM_026651      | Pomgnt1  | O-mannosyl N-acetylglucosaminyltransferase                                                                               |
| V2MM_80415  | NM_026340      | Pop1     | processing of precursors 1 homolog                                                                                       |
| V2MM_122588 | NM_011147      | Ppef1    | protein phosphatase with EF hand calcium-binding domain 1                                                                |
| V2MM_104021 | NM_001144855.1 | Ppfia4   | protein tyrosine phosphatase, receptor type, f polypeptide (PTPRF), interacting protein (liprin), alpha 4 (Ppfia4), mRNA |
| V2MM_1623   | NM_025896      | Prl3a1   | prolactin family 3, subfamily a, member 1                                                                                |
| V2MM_20386  | NM_025894      | Psmc12   | proteasome 26S non-ATPase subunit 12                                                                                     |
| V2MM_43565  | NM_008974      | Ptp4a2   | protein tyrosine phosphatase 4a2                                                                                         |
| V2MM_74748  | NM_025412      | Pycrl    | pyrroline-5-carboxylate reductase-like                                                                                   |
| V2MM_79017  | NM_029576      | Rab1b    | RAB1B, member RAS oncogene family                                                                                        |
| V2MM_160230 | NM_177375.1    | Rab26    | RAB26, member RAS oncogene family                                                                                        |
| V2MM_81933  | NM_011228      | Rab33a   | RAB33A, member of RAS oncogene family                                                                                    |
| V2MM_72240  | NM_011240      | Ranbp2   | RAN binding protein 2                                                                                                    |
| V2MM_91870  | NM_178608      | Reep1    | receptor expression enhancing protein 1                                                                                  |
| V2MM_10428  | NM_009044      | Rel      | reticuloendotheliosis oncogene                                                                                           |
| V2MM_93143  | NM_178916      | Rfesd    | Rieske (Fe-S) domain containing                                                                                          |
| V2MM_196716 | NM_001024918   | Rfx4     | regulatory factor X, 4                                                                                                   |
| V2MM_148    | NM_133231      | Rfxap    | regulatory factor X-associated protein                                                                                   |
| V2MM_192220 | NM_001081105   | RhoH     | ras homolog gene family, member H                                                                                        |
| V2MM_190118 | NM_027187      | Rnaseh2a | ribonuclease H2, large subunit                                                                                           |
| V2MM_152592 | NM_001113413.1 | Rnf13    | ring finger protein 13                                                                                                   |
| V2MM_76744  | NM_011291      | Rpl7     | ribosomal protein L7                                                                                                     |
| V2MM_66643  | NM_011295      | Rps12    | ribosomal protein S12                                                                                                    |
| V2MM_79400  | NM_011321      | Sbp      | spermine binding protein                                                                                                 |

|             |              |          |                                                                                                    |
|-------------|--------------|----------|----------------------------------------------------------------------------------------------------|
| V2MM_61345  | NM_172769    | Sc5d     | sterol-C5-desaturase (fungal ERG3, delta-5-desaturase) homolog                                     |
| V2MM_20673  | NM_009130    | Scg3     | secretogranin III                                                                                  |
| V2MM_210895 | NM_001012322 | Sctr     | secretin receptor                                                                                  |
| V2MM_11287  | NM_026563    | Sdccag3  | serologically defined colon cancer antigen 3                                                       |
| V2MM_164864 | NM_011343    | Sec61g   | SEC61, gamma subunit                                                                               |
| V2MM_202500 | NM_027997    | Serpina9 | serine (or cysteine) proteinase inhibitor, clade A (alpha-1 antiproteinase, antitrypsin), member 9 |
| V2MM_84153  | NM_026989    | Sfrs11   | splicing factor, arginine/serine-rich 11                                                           |
| V2MM_101495 | NM_177816    | Sh2d4b   | SH2 domain containing 4B                                                                           |
| V2MM_75040  | NM_011387    | Slc10a1  | solute carrier family 10 (sodium/bile acid cotransporter family), member 1                         |
| V2MM_77996  | NM_053079    | Slc15a1  | solute carrier family 15 (oligopeptide transporter), member 1                                      |
| V2MM_12468  | NM_153054    | Slc18a1  | solute carrier family 18, member 1                                                                 |
| V2MM_34235  | NM_015829    | Slc25a13 | solute carrier family 25 (mitochondrial carrier, adenine nucleotide translocator), member 13       |
| V2MM_224962 | NM_178675    | Slc35f1  | solute carrier family 35, member F1                                                                |
| V2MM_49822  | NM_031842    | Smarcd1  | SWI/SNF related, matrix associated, actin dependent regulator of chromatin, subfamily d, member 1  |
| V2MM_62515  | NM_021535    | Smu1     | smu-1 suppressor of mec-8 and unc-52 homolog                                                       |
| V2MM_78592  | NM_013914    | Snai3    | snail homolog 3                                                                                    |
| V2MM_56692  | NM_019973    | Son      | Son cell proliferation protein                                                                     |
| V2MM_71495  | NM_007463    | Speg     | SPEG complex locus                                                                                 |
| V2MM_126074 | NM_183284    | Spink2   | serine protease inhibitor, Kazal type 2                                                            |
| V2MM_79207  | NM_033524    | Spred1   | sprouty-related protein 1 with EVH-1 domain                                                        |
| V2MM_118883 | NM_030133.3  | Srbd1    | S1 RNA binding domain 1                                                                            |
| V2MM_20594  | NM_009220    | Ssty1    | spermiogenesis specific transcript on the Y 1                                                      |
| V2MM_64930  | NM_175031    | Stk36    | serine/threonine kinase36                                                                          |
| V2MM_51685  | NM_025285    | Stmn2    | stathmin-like 2                                                                                    |
| V2MM_22835  | NM_144796    | Susd4    | sushi domain containing 4                                                                          |



|             |                |           |                                                                       |
|-------------|----------------|-----------|-----------------------------------------------------------------------|
| V2MM_96046  | NM_199196      | Suz12     | suppressor of zeste 12 homolog (Drosophila)                           |
| V2MM_87377  | NM_175151      | Tatdn1    | TatD DNase domain containing 1                                        |
| V2MM_87377  | NM_175151      | Tatdn1    | TatD DNase domain containing 1                                        |
| V2MM_30412  | NM_145476      | Tbc1d22a  | TBC1 domain family, member 22a                                        |
| V2MM_208988 | NM_009333      | Tcf7l2    | transcription factor 7-like 2, T-cell specific, HMG-box               |
| V2MM_17838  | NM_153154      | Tcfap2d   | transcription factor AP-2, delta                                      |
| V2MM_38244  | NM_148949      | Tdpoz1    | TD and POZ domain containing 1                                        |
| V2MM_33666  | NM_031374      | Tex15     | testis expressed gene 15                                              |
| V2MM_83203  | NM_011583      | Theg      | testicular haploid expressed gene product                             |
| V2MM_80640  | NM_026067      | Thex1     | histone mRNA 3'end-specific exonuclease                               |
| V2MM_95870  | NM_001080931   | Thrap1    | mediator of RNA polymerase II transcription, subunit 13 homolog       |
| V2MM_95870  | NM_001080931   | Thrap1    | mediator of RNA polymerase II transcription, subunit 13 homolog       |
| V2MM_92707  | NM_178759      | Timd4     | T-cell immunoglobulin and mucin domain containing 4                   |
| V2MM_6140   | NM_019432      | Tmem37    | protein distantly related to to the gamma subunit family              |
| V2MM_197078 | NM_177601      | Tmem60    | transmembrane protein 60                                              |
| V2MM_125003 | NM_001085508.2 | Tmem8b    | transmembrane protein 8B                                              |
| V2MM_19570  | NM_134138      | Tnfsf5ip1 | Clast3 protein                                                        |
| V2MM_63425  | NM_025482      | Tpd52l2   | tumor protein D52-like 2                                              |
| V2MM_72167  | NM_053084      | Trim32    | tripartite motif protein 32                                           |
| V2MM_54547  | NM_028604      | Trmt11    | RIKEN cDNA 2410075D05                                                 |
| V2MM_107145 | NM_029264      | Ttl10     | tubulin tyrosine ligase-like family, member 10                        |
| V2MM_51584  | NM_029064      | Ttl9      | tubulin tyrosine ligase like family 9                                 |
| V2MM_57271  | NM_011652      | Ttn       | titin                                                                 |
| V2MM_76225  | NM_011652      | Ttn       | Titin                                                                 |
| V2MM_30357  | NM_028283      | Uaca      | nuclear membrane binding protein NUCLING                              |
| V2MM_37708  | NM_180600      | Ube2q2    | ubiquitin-conjugating enzyme E2Q 2                                    |
| V2MM_52842  | NM_022022      | Ube4b     | ubiquitination factor E4B                                             |
| V2MM_86679  | NM_173754      | Usp43     | ubiquitin specific protease 43                                        |
| V2MM_85331  | NM_133992      | Usp52     | ubiquitin specific protease 52                                        |
| V2MM_262088 | NM_134206      | V1rg5     | vomer nasal 1 receptor, G5                                            |
| V2MM_75730  | NM_173443      | Vcpip1    | valosin-containing protein (p97)/p47 complex-interacting protein p135 |
| V2MM_127064 | NM_001104632.1 | Vmn2r19   | vomer nasal 2, receptor 19                                            |
| V2MM_128716 | NM_001102579.1 | Vmn2r67   | vomer nasal 2, receptor 67                                            |
| V2MM_132216 | NM_001033237   | Yeats2    | YEATS domain containing 2                                             |
| V2MM_67153  | NM_178363      | Ylpm1     | YLP motif containing 1                                                |

|             |           |         |                                       |
|-------------|-----------|---------|---------------------------------------|
| V2MM_250640 | NM_153398 | Zbtb24  | zinc finger protein 450               |
| V2MM_101666 | NM_026083 | Zc3h13  | RIKEN cDNA3110050K21                  |
| V2MM_16756  | NM_134007 | Zcd1    | zinc finger, CDGSH-type domain 1      |
| V2MM_2438   | NM_172151 | Zdhhc8  | zinc finger, DHHC domain containing 8 |
| V2MM_46516  | NM_172586 | Zfp322a | zinc finger protein 322a              |
| V2MM_84160  | NM_027007 | Zfp397  | zinc finger protein 397               |
| V2MM_220730 | NM_025594 | Zmat2   | zinc finger, matrin type 2            |
| V2MM_62976  | NM_025594 | Zmat2   | zinc finger, matrin type 2            |

**Supplementary Table S1B**

A list of false discovery rates for each functional category identified in the shRNA screen

| <b>annotation cluster</b> | <b>category</b>                                    | <b>count</b> | <b>p-value</b> | <b>FDR</b> |
|---------------------------|----------------------------------------------------|--------------|----------------|------------|
| Annotation Cluster 1      | IPR005843:Alpha-D-phosphohexomutase, C-terminal    | 3            | 0.027146493    | 36.9       |
| Annotation Cluster 2      | SM00324:RhoGAP                                     | 10           | 0.039936789    | 53.8       |
| Annotation Cluster 3      | IPR003104:Actin-binding FH2 and DRF autoregulatory | 5            | 0.013959353    | 21.0       |
| Annotation Cluster 4      | SM00674:CENPB                                      | 4            | 0.020142512    | 23.6       |
| Annotation Cluster 5      | repeat:NHL 5                                       | 4            | 0.039470718    | 51.0       |
| Annotation Cluster 7      | IPR000337:GPCR, family 3                           | 6            | 0.033004549    | 43.0       |
| Annotation Cluster 8      | SM00355:ZnF_C2H2                                   | 61           | 0.024730013    | 28.2       |
| Annotation Cluster 10     | metal ion-binding site:Zinc; catalytic             | 16           | 0.021799807    | 32.3       |
| Annotation Cluster 13     | SM00612:Kelch                                      | 10           | 0.039936789    | 41.7       |
| Annotation Cluster 16     | SM00249:zinc finger region PHD-type                | 13           | 0.022221399    | 25.7       |

**Supplementary Table S2**

shRNAs that deplete specifically *in vivo*. shRNAs targeting annotated genes, predicted genes, and predicted proteins that deplete an average of four-fold *in vivo* and deplete less than 25% *in vitro* are listed. The average fold change of each shRNA *in vitro* and *in vivo* was normalized to the median fold change of all shRNAs in that setting.

| shRNA ID    | accession number | gene symbol   | gene name                            |
|-------------|------------------|---------------|--------------------------------------|
| V2MM_191164 | NM_027855        | 0610007C21Rik | apoptosis related protein APR-3      |
| V2MM_53293  | NM_025319        | 0610009B22Rik | hypothetical protein LOC66050        |
| V2MM_94754  | NM_183249        | 1100001G20Rik | WDNM1-like protein                   |
| V2MM_35787  | NM_019772        | 1110004F10Rik | small acidic protein                 |
| V2MM_55035  | NM_025364        | 1110005A23Rik | cytokine induced protein 29 kDa      |
| V2MM_60087  | NM_145955        | 1110007A13Rik | hypothetical protein LOC210711       |
| V2MM_232904 | NM_025373.1      | 1110008L16Rik | RIKEN cDNA 1110008L16 gene           |
| V2MM_232200 | NM_026841.1      | 1110059M19Rik | RIKEN cDNA 1110059M19 gene           |
| V2MM_41898  | NM_027878        | 1200002N14Rik | damage-regulated autophagy modulator |
| V2MM_79348  | NM_026166        | 1200009F10Rik | IKK interacting protein              |
| V2MM_66225  | NM_028773        | 1200013B08Rik | hypothetical protein LOC74131        |
| V2MM_101678 | NM_027906.1      | 1300010F03Rik | RIKEN cDNA 1300010F03 gene           |
| V2MM_108242 | NM_026894        | 1500001M20Rik | MMP37-like protein, mitochondrial    |
| V2MM_84105  | NM_026889        | 1500010J02Rik | hypothetical protein LOC68964        |
| V2MM_43254  | NM_177132        | 1520401A03Rik | hypothetical protein LOC320309       |
| V2MM_102685 | NM_028056        | 1600002H07Rik | hypothetical protein LOC72016        |
| V2MM_211157 | NM_001081273     | 1600015I10Rik | hypothetical protein LOC69761        |
| V2MM_135220 | XR_106035.1      | 1600025M17Rik | RIKEN cDNA 1600025M17 gene           |
| V2MM_139    | NM_027041        | 1700003M02Rik | hypothetical protein LOC69329        |
| V2MM_104219 | NM_027077        | 1700016C15Rik | hypothetical protein LOC69428        |
| V2MM_229653 | NM_198637        | 1700016K19Rik | hypothetical protein LOC74230        |
| V2MM_110694 | NM_028820        | 1700017B05Rik | hypothetical protein LOC74211        |
| V2MM_202550 | NM_028820        | 1700017B05Rik | hypothetical protein LOC74211        |
| V2MM_84260  | NM_027405        | 1700020O03Rik | hypothetical protein LOC70373        |
| V2MM_233497 | XM_988914.2      | 1700021P04Rik | RIKEN cDNA 1700021P04 gene           |
| V2MM_108412 | NM_027059.1      | 1700023A16Rik | RIKEN cDNA 1700023A16 gene           |
| V2MM_231820 | NM_027064.1      | 1700024P04Rik | RIKEN cDNA 1700024P04 gene           |
| V2MM_145758 | NM_001162980.1   | 1700024P16Rik | RIKEN cDNA 1700024P16 gene           |
| V2MM_102192 | NM_028180        | 1700030F18Rik | hypothetical protein LOC72277        |
| V2MM_106497 | NM_028499        | 1700034K16Rik | hypothetical protein LOC73314        |
| V2MM_110591 | XR_105277.1      | 1700036A12Rik | RIKEN cDNA 1700036A12 gene           |
| V2MM_202159 | XR_105277.1      | 1700036A12Rik | RIKEN cDNA 1700036A12 gene           |
| V2MM_101604 | NM_028525        | 1700049K14Rik | hypothetical protein LOC73382        |
| V2MM_78584  | NM_026105        | 1700093K21Rik | hypothetical protein LOC67358        |
| V2MM_107186 | NM_029843        | 1700109H08Rik | hypothetical protein LOC77036        |
| V2MM_17970  | XM_003084965.1   | 1700110I01Rik | RIKEN cDNA 1700110I01 gene           |
| V2MM_101385 | NM_028275.1      | 1700112E06Rik | RIKEN cDNA 1700112E06 gene           |
| V2MM_15069  | NM_026627        | 1700113O17Rik | histone variant H2aI2                |
| V2MM_239273 | NM_194348        | 1810013C15Rik | hypothetical protein LOC329015       |

|             |                |               |                                                             |
|-------------|----------------|---------------|-------------------------------------------------------------|
| V2MM_221678 | NM_026327      | 1810048J11Rik | hypothetical protein LOC67708                               |
| V2MM_107500 | XM_001473772.2 | 2010109A12Rik | RIKEN cDNA 2010109A12 gene                                  |
| V2MM_106670 | NM_001033165   | 2010203O07Rik | hypothetical protein LOC72429                               |
| V2MM_226090 | NM_175153      | 2010321M09Rik | hypothetical protein LOC69882                               |
| V2MM_232195 | NM_026955      | 2200002K05Rik | hypothetical protein LOC69137                               |
| V2MM_226319 | NM_175391      | 2210421G13Rik | hypothetical protein LOC108956                              |
| V2MM_226270 | NM_175249      | 2310020A21Rik | hypothetical protein LOC76943                               |
| V2MM_8839   | NM_025964      | 2310038H17Rik | hypothetical protein LOC67099                               |
| V2MM_68643  | NM_025634      | 2310042E22Rik | hypothetical protein LOC66561                               |
| V2MM_102459 | NM_027155.1    | 2310061N02Rik | RIKEN cDNA 2310061N02 gene                                  |
| V2MM_102463 | NM_027173.1    | 2310079G19Rik | RIKEN cDNA 2310079G19 gene                                  |
| V2MM_195917 | NM_025542      | 2410001C21Rik | hypothetical protein LOC66404                               |
| V2MM_81340  | NM_026113      | 2410016F19Rik | hypothetical protein LOC67371                               |
| V2MM_30274  | NM_024254      | 2410042D21Rik | hypothetical protein LOC72425                               |
| V2MM_87779  | NM_175245      | 2410129H14Rik | hypothetical protein LOC76789                               |
| V2MM_131086 | NM_001004362   | 2610008E11Rik | hypothetical protein LOC72128                               |
| V2MM_110776 | NM_027394      | 2610018I03Rik | UbcH10 binding protein with a hect-like domain              |
| V2MM_226380 | NM_173744      | 2610019F03Rik | hypothetical protein LOC72148                               |
| V2MM_224332 | NM_029282      | 2610036D13Rik | hypothetical protein LOC75425                               |
| V2MM_48344  | NM_001031814   | 2610207I05Rik | PI-3-kinase-related kinase SMG-1                            |
| V2MM_49263  | NM_001031814   | 2610207I05Rik | PI-3-kinase-related kinase SMG-1                            |
| V2MM_37046  | NM_145626      | 2610208M17Rik | hypothetical protein LOC108909                              |
| V2MM_84278  | NM_027434      | 2610304G08Rik | cell-cycle related and expression-elevated protein in tumor |
| V2MM_84008  | NM_026620      | 2610510H03Rik | family with sequence similarity 98, member B                |
| V2MM_35585  | NM_028131      | 2610510J17Rik | hypothetical protein LOC72155                               |
| V2MM_88334  | NM_175381      | 2700081O15Rik | hypothetical protein LOC108899                              |
| V2MM_195029 | NM_175179      | 2810002O09Rik | RIKEN cDNA 2810002O09                                       |
| V2MM_29490  | NM_172403      | 2810021J22Rik | hypothetical protein LOC69944                               |
| V2MM_25339  | NM_144882      | 2810022L02Rik | hypothetical protein LOC67198                               |
| V2MM_33854  | NM_024428      | 2810410M20Rik | dosage compensation-related protein DPY30                   |
| V2MM_44152  | NM_021430      | 2900002H16Rik | hypothetical protein LOC75695                               |
| V2MM_202979 | XM_003085224.1 | 2900055J20Rik | RIKEN cDNA 2900055J20 gene                                  |
| V2MM_196626 | NM_028434      | 2900092C05Rik | hypothetical protein LOC73090                               |
| V2MM_226548 | NM_028440.1    | 3110003A17Rik | RIKEN cDNA 3110003A17 gene                                  |
| V2MM_100964 | NM_001033167   | 3110004L20Rik | hypothetical protein LOC73102                               |
| V2MM_206220 | NM_028443      | 3110032G18Rik | hypothetical protein LOC73121                               |
| V2MM_70603  | NM_026313      | 3300001P08Rik | cisplatin resistance-associated overexpressed protein       |
| V2MM_191771 | NM_001081295   | 4631416L12Rik | hypothetical protein LOC622434                              |
| V2MM_73064  | NM_028725      | 4632417N05Rik | RIKEN cDNA 4632417N05 gene                                  |
| V2MM_240835 | NM_199009      | 4632419K20Rik | hypothetical protein LOC74349                               |
| V2MM_88040  | NM_175307      | 4732473B16Rik | hypothetical protein LOC100342                              |
| V2MM_204758 | NM_001081664   | 4833423E24Rik | hypothetical protein LOC228151                              |
| V2MM_129844 | NM_001024606   | 4833426J09Rik | pyruvate dehydrogenase phosphatase isoenzyme 2              |

|             |                |               |                                |
|-------------|----------------|---------------|--------------------------------|
| V2MM 89972  | NM 177702      | 4833427G06Rik | hypothetical protein LOC235345 |
| V2MM 104389 | NM 027580      | 4921511C04Rik | hypothetical protein LOC70853  |
| V2MM 83847  | NM 025723      | 4921515J06Rik | hypothetical protein LOC66715  |
| V2MM 66621  | NM 026338      | 4921517D21Rik | hypothetical protein LOC67722  |
| V2MM 105080 | NM 001080709   | 4930402F06Rik | hypothetical protein LOC74854  |
| V2MM 111246 | XM 135594.5    | 4930402K13Rik | RIKEN cDNA 4930402K13 gene     |
| V2MM 84758  | NM 029115      | 4930455F23Rik | hypothetical protein LOC74895  |
| V2MM 84759  | NM 029115      | 4930455F23Rik | RIKEN cDNA 4930455F23 gene     |
| V2MM 234766 | NM 183109      | 4930478A21Rik | hypothetical protein LOC75002  |
| V2MM 54228  | NM 029131      | 4930503E14Rik | hypothetical protein LOC74954  |
| V2MM 72563  | NM 172967      | 4930503L19Rik | hypothetical protein LOC269033 |
| V2MM 110539 | XM 003084781.1 | 4930510E17Rik | RIKEN cDNA 4930510E17 gene     |
| V2MM 231662 | XR 105172.1    | 4930544L04Rik | RIKEN cDNA 4930544L04 gene     |
| V2MM 206418 | XR 105748.1    | 4930548G14Rik | RIKEN cDNA 4930548G14 gene     |
| V2MM 202278 | XM 003085136.1 | 4930556A20Rik | RIKEN cDNA 4930556A20 gene     |
| V2MM 87707  | NM 175228      | 4930578C19Rik | hypothetical protein LOC75905  |
| V2MM 21654  | NM 133732      | 4931406C07Rik | hypothetical protein LOC70984  |
| V2MM 112678 | NM 001033764   | 4931408C20Rik | hypothetical protein LOC210940 |
| V2MM 36433  | NM 027637      | 4931428L18Rik | hypothetical protein LOC70988  |
| V2MM 89997  | NM 177711      | 4932411G14Rik | hypothetical protein LOC238663 |
| V2MM 121872 | NM 001085511.1 | 4932429P05Rik | RIKEN cDNA 4932429P05 gene     |
| V2MM 51151  | NM 177141      | 4932438A13Rik | RIKEN cDNA 4932438A13 gene     |
| V2MM 101720 | NM 001081063   | 4933401F05Rik | hypothetical protein LOC71037  |
| V2MM 55418  | NM 153794      | 4933403F05Rik | hypothetical protein LOC108654 |
| V2MM 99050  | XM 003085666.1 | 4933406P04Rik | RIKEN cDNA 4933406P04 gene     |
| V2MM 89701  | NM 177651      | 4933409G03Rik | hypothetical protein LOC227998 |
| V2MM 89702  | NM 177651      | 4933409G03Rik | hypothetical protein LOC227998 |
| V2MM 92101  | NM 178649      | 4933409K07Rik | hypothetical protein LOC108816 |
| V2MM 36634  | NM 027670      | 4933411G06Rik | hypothetical protein LOC71090  |
| V2MM 86798  | NM 173778      | 4933412E14Rik | hypothetical protein LOC244885 |
| V2MM 203467 | XM 003085414.1 | 4933415A04Rik | RIKEN cDNA 4933415A04 gene     |
| V2MM 104395 | XR 104543.1    | 4933424G06Rik | RIKEN cDNA 4933424G06 gene     |
| V2MM 104395 | XR 104543.1    | 4933424G06Rik | RIKEN cDNA 4933424G06 gene     |
| V2MM 197586 | NM 175017      | 4933427D06Rik | hypothetical protein LOC232217 |
| V2MM 84714  | NM 028963      | 4933427D14Rik | hypothetical protein LOC74477  |
| V2MM 89493  | NM 177607      | 4933430I17Rik | hypothetical protein LOC214106 |
| V2MM 102266 | NM 029407.1    | 4933432B09Rik | RIKEN cDNA 4933432B09 gene     |
| V2MM 102268 | NM 029407.1    | 4933432B09Rik | RIKEN cDNA 4933432B09 gene     |
| V2MM 76636  | NM 025762      | 4933434E20Rik | hypothetical protein LOC99650  |
| V2MM 74979  | NM 026233      | 4933434I20Rik | hypothetical protein LOC67555  |
| V2MM 74372  | NM 025763      | 4933436I01Rik | hypothetical protein LOC66780  |
| V2MM 50655  | NM 198004      | 5133401N09Rik | gluconokinase-like protein     |
| V2MM 211585 | NM 027788      | 5530400B04Rik | hypothetical protein LOC71405  |
| V2MM 83839  | NM 025666      | 5730410I19Rik | hypothetical protein LOC66622  |
| V2MM 34295  | NM 027482      | 5730508B09Rik | hypothetical protein LOC70617  |
| V2MM 74769  | NM 026153      | 5730557B15Rik | hypothetical protein LOC67434  |
| V2MM 90759  | NM 177854      | 6030405A18Rik | hypothetical protein LOC329641 |
| V2MM 45795  | NM 177359      | 6030490I01Rik | zinc finger protein            |
| V2MM 39459  | NM 027519      | 6330406I15Rik | hypothetical protein LOC70717  |

|             |                |               |                                                      |
|-------------|----------------|---------------|------------------------------------------------------|
| V2MM 84311  | NM 027518      | 6330416L11Rik | G protein-coupled receptor 137C                      |
| V2MM 100918 | NM 029679      | 6330500D04Rik | hypothetical protein LOC193385                       |
| V2MM 106038 | NM 001033301   | 6330505N24Rik | hypothetical protein LOC229474                       |
| V2MM 55425  | NM 177265      | 6330512M04Rik | hypothetical protein LOC320802                       |
| V2MM 46196  | NM 172774      | 6620401K05Rik | ATR interacting protein                              |
| V2MM 87810  | NM 175252      | 6720457D02Rik | hypothetical protein LOC77117                        |
| V2MM 170614 | NM 177374      | 6720458F09Rik | hypothetical protein LOC328162                       |
| V2MM 232987 | NM 001033776   | 7420416P09Rik | hypothetical protein LOC432677                       |
| V2MM 226592 | NM 183224      | 7530404M11Rik | TAFA3 protein                                        |
| V2MM 194670 | NM 177755      | 8230402K04Rik | hypothetical protein LOC268807                       |
| V2MM 54449  | NM 177136      | 9030227G01Rik | RIKEN cDNA 9030227G01 gene                           |
| V2MM 102882 | NM 027834      | 9130008F23Rik | hypothetical protein LOC71583                        |
| V2MM 95663  | NM 198118      | 9130019P16Rik | RIKEN cDNA 9130019P16 gene                           |
| V2MM 27112  | NM 177001      | 9130023H24Rik | RIKEN cDNA 9130023H24 gene                           |
| V2MM 224585 | NM 178400      | 9130221H12Rik | hypothetical protein LOC77124                        |
| V2MM 225155 | NM 178400      | 9130221H12Rik | hypothetical protein LOC77124                        |
| V2MM 101489 | XM 127665.6    | 9230112D13Rik | RIKEN cDNA 9230112D13 gene                           |
| V2MM 199435 | XR 104969.1    | 9530028C05    | hypothetical protein 9530028C05                      |
| V2MM 262414 | NM 175680      | 9530080O11Rik | RIKEN cDNA 9530080O11 gene                           |
| V2MM 52951  | NM 177159      | 9530091C08Rik | hypothetical protein LOC320440                       |
| V2MM 58356  | NM 177363      | 9930022N03Rik | hypothetical protein LOC245126                       |
| V2MM 43549  | NM 177162      | 9930032O22Rik | serine protease Desc4                                |
| V2MM 76042  | NM 173434      | 9930111J21Rik | hypothetical protein LOC245240                       |
| V2MM 226092 | NM 175313      | A130022J15Rik | RIKEN cDNA A130022J15                                |
| V2MM 227403 | NM 175313      | A130022J15Rik | RIKEN cDNA A130022J15                                |
| V2MM 194158 | NM 177622      | A230042K10Rik | hypothetical protein A230042K10                      |
| V2MM 195278 | NM 177622      | A230042K10Rik | hypothetical protein A230042K10                      |
| V2MM 211824 | NM 001033348   | A230067G21Rik | hypothetical protein LOC241694                       |
| V2MM 177486 | XR 108142.1    | A430016B06    | hypothetical protein A430016B06                      |
| V2MM 89371  | NM 177578      | A430090E18Rik | hypothetical protein LOC195564                       |
| V2MM 92838  | NM 178785      | A430107D22Rik | hypothetical protein LOC320484                       |
| V2MM 203931 | NM 177055.3    | A630001G21Rik | RIKEN cDNA A630001G21 gene                           |
| V2MM 53483  | NM 145969      | A630054L15Rik | hypothetical protein LOC211922                       |
| V2MM 90725  | NM 177847      | A730036I17Rik | hypothetical protein LOC329513                       |
| V2MM 107602 | NM 001007574.2 | A830010M20Rik | RIKEN cDNA A830010M20 gene                           |
| V2MM 107604 | NM 001007574.2 | A830010M20Rik | RIKEN cDNA A830010M20 gene                           |
| V2MM 54943  | NM 177173      | A830018L16Rik | hypothetical protein LOC320492                       |
| V2MM 78503  | NM 173425      | A830043J08Rik | hypothetical protein LOC241128                       |
| V2MM 107320 | NM 207277      | A930005I04Rik | hypothetical protein LOC403174                       |
| V2MM 192745 | NM 145415      | AA408296      | digestive-organ expansion factor homolog             |
| V2MM 85375  | NM 134087      | AA409316      | hypothetical protein LOC105732                       |
| V2MM 226351 | NM 178894      | AA792892      | hypothetical protein LOC100554                       |
| V2MM 92773  | NM 178772      | Aadacl1       | arylacetamide deacetylase-like 1                     |
| V2MM 28017  | NM 144829      | Aarsd1        | alanyl-tRNA synthetase domain containing 1           |
| V2MM 196120 | NM 175210      | Abca12        | ATP-binding cassette, sub-family A (ABC1), member 12 |

|             |              |          |                                                                                               |
|-------------|--------------|----------|-----------------------------------------------------------------------------------------------|
| V2MM_53248  | NM_147220    | Abca9    | ATP-binding cassette transporter sub-family A member 9                                        |
| V2MM_100310 | NM_029600    | Abcc3    | ATP-binding cassette, sub-family C (CFTR/MRP), member 3                                       |
| V2MM_162314 | NM_011510    | Abcc8    | ATP-binding cassette, sub-family C (CFTR/MRP), member 8                                       |
| V2MM_53058  | NM_008991    | Abcd3    | ATP-binding cassette, sub-family D, member 3                                                  |
| V2MM_49638  | NM_021304    | Abhd1    | abhydrolase domain containing 1                                                               |
| V2MM_64325  | NM_025659    | Abi3     | ABI gene family, member 3                                                                     |
| V2MM_92866  | NM_178790    | Abi3bp   | ABI gene family, member 3 (NESH) binding protein                                              |
| V2MM_92866  | NM_178790    | Abi3bp   | ABI gene family, member 3 (NESH) binding protein                                              |
| V2MM_27443  | NM_030718    | Abo      | cis-AB transferase                                                                            |
| V2MM_83423  | NM_013924    | Abt1     | activator of basal transcription                                                              |
| V2MM_120214 | NM_030063.2  | Acbd7    | acyl-Coenzyme A binding domain containing 7                                                   |
| V2MM_21967  | NM_134247    | Acot4    | peroxisomal acyl-CoA thioesterase 2B                                                          |
| V2MM_100520 | NM_172580    | Acot6    | acyl-CoA thioesterase 6                                                                       |
| V2MM_25561  | NM_030721    | Acox3    | acyl-Coenzyme A oxidase 3, pristanoyl                                                         |
| V2MM_34087  | NM_019807    | Acpp     | acid phosphatase, prostate                                                                    |
| V2MM_33619  | NM_007981    | Acs1     | acyl-CoA synthetase long-chain family member 1                                                |
| V2MM_34878  | NM_023735    | Actr3    | ARP3 actin-related protein 3 homolog                                                          |
| V2MM_213534 | NM_001004365 | Actr3b   | ARP3 actin-related protein 3 homolog B                                                        |
| V2MM_69559  | NM_007398    | Ada      | adenosine deaminase                                                                           |
| V2MM_76480  | NM_007400    | Adam12   | a disintegrin and metalloprotease domain 12                                                   |
| V2MM_60419  | NM_009616    | Adam19   | a disintegrin and metalloprotease domain 19                                                   |
| V2MM_33095  | NM_011780    | Adam23   | a disintegrin and metalloprotease domain 23                                                   |
| V2MM_21143  | NM_174885    | Adam6    | a disintegrin and metalloprotease domain 6                                                    |
| V2MM_54702  | NM_009621    | Adamts1  | a disintegrin-like and metalloprotease (reprolysin type) with thrombospondin type 1 motif, 1  |
| V2MM_43093  | NM_172619    | Adamts10 | a disintegrin-like and metalloprotease (reprolysin type) with thrombospondin type 1 motif, 10 |



|             |              |          |                                                                                               |
|-------------|--------------|----------|-----------------------------------------------------------------------------------------------|
| V2MM_31164  | NM_172466    | Adamts18 | a disintegrin-like and metalloprotease (reprolysin type) with thrombospondin type 1 motif, 18 |
| V2MM_88792  | NM_001081020 | Adamts6  | a disintegrin-like and metalloprotease (reprolysin type) with thrombospondin type 1 motif, 6  |
| V2MM_13318  | NM_052977    | Adarb2   | adenosine deaminase, RNA-specific, B2                                                         |
| V2MM_60771  | NM_009605    | Adipoq   | adiponectin, C1Q and collagen domain containing                                               |
| V2MM_28189  | NM_146102    | Afap112  | actin filament associated protein 1-like 2                                                    |
| V2MM_25980  | NM_133919    | Aff1     | myeloid/lymphoid or mixed-lineage leukemia translocated to 2 homolog                          |
| V2MM_68883  | NM_007428    | Agt      | angiotensinogen                                                                               |
| V2MM_36640  | NM_011784    | Agtrl1   | angiotensin II receptor-like 1                                                                |
| V2MM_50216  | NM_027907    | Agxt211  | alanine-glyoxylate aminotransferase 2-like 1                                                  |
| V2MM_201281 | XR_105132.1  | AI314278 | expressed sequence AI314278                                                                   |
| V2MM_196817 | NM_198860    | AI646023 | hypothetical protein LOC192734                                                                |
| V2MM_240009 | NM_213729    | AI842396 | inhibitor of CDK interacting with cyclin A1                                                   |
| V2MM_90842  | NM_177869    | AI847670 | hypothetical protein LOC330050                                                                |
| V2MM_87476  | NM_175178    | Aifm3    | apoptosis-inducing factor like                                                                |
| V2MM_89120  | NM_175936    | AJ543404 | cDNA sequence AJ543404                                                                        |
| V2MM_89441  | NM_177597    | AK162044 | hypothetical protein LOC211147                                                                |
| V2MM_89443  | NM_177597    | AK162044 | hypothetical protein LOC211147                                                                |
| V2MM_35133  | NM_019921    | Akap10   | A kinase (PRKA) anchor protein 10                                                             |
| V2MM_80282  | NM_001033785 | Akap14   | A kinase (PRKA) anchor protein 14                                                             |
| V2MM_32931  | NM_011921    | Aldh1a7  | aldehyde dehydrogenase family 1, subfamily A7                                                 |
| V2MM_196306 | NM_001081264 | Alg6     | asparagine-linked glycosylation 6 homolog (yeast, alpha-1,3,-glucosyltransferase)             |
| V2MM_232116 | NM_001081264 | Alg6     | asparagine-linked glycosylation 6 homolog (yeast, alpha-1,3,-glucosyltransferase)             |
| V2MM_87076  | NM_175016    | Alkbh2   | alkB, alkylation repair homolog 2                                                             |
| V2MM_27082  | NM_146228    | Als2cl   | Als2 C-terminal like                                                                          |
| V2MM_87585  | NM_175200    | Als2cr11 | amyotrophic lateral sclerosis 2 (juvenile) chromosome region, candidate 11                    |
| V2MM_87586  | NM_175200    | Als2cr11 | amyotrophic lateral sclerosis 2 (juvenile) chromosome region, candidate 11                    |

|             |                |           |                                                                                    |
|-------------|----------------|-----------|------------------------------------------------------------------------------------|
| V2MM_150596 | NM_001037725   | Als2cr13  | amyotrophic lateral sclerosis 2 (juvenile) chromosome region, candidate 13 (human) |
| V2MM_26364  | NM_024213      | Anapc4    | anaphase-promoting complex subunit 4                                               |
| V2MM_30233  | NM_019805      | Anapc7    | anaphase-promoting complex subunit 7                                               |
| V2MM_44066  | NM_009640      | Angpt1    | angiopoietin 1                                                                     |
| V2MM_96349  | NM_001003909   | Ankib1    | ankyrin repeat and IBR domain containing 1                                         |
| V2MM_25973  | NM_027480      | Ankrd24   | ankyrin repeat domain 24                                                           |
| V2MM_101501 | NM_001024604   | Ankrd28   | ankyrin repeat domain 28                                                           |
| V2MM_195814 | NM_175270      | Ankrd56   | ankyrin repeat domain 56                                                           |
| V2MM_226898 | NM_178402      | Anks1b    | ankyrin repeat and sterile alpha motif domain containing 1B                        |
| V2MM_35890  | NM_028085      | Anks4b    | harmonin-interacting ankyrin-repeat containing                                     |
| V2MM_231497 | NM_001081556.1 | Ano3      | anoctamin 3                                                                        |
| V2MM_136201 | NM_207031.1    | Ano7      | anoctamin 7                                                                        |
| V2MM_107626 | NM_133738      | Antxr2    | anthrax toxin receptor 2                                                           |
| V2MM_58832  | NM_013469      | Anxa11    | annexin A11                                                                        |
| V2MM_61249  | NM_009675      | Aoc3      | amine oxidase, copper containing 3                                                 |
| V2MM_30582  | NM_026887      | Ap1s2     | adaptor-related protein complex 1 sigma 2 subunit                                  |
| V2MM_210228 | NM_175550      | Ap4e1     | adaptor-related protein complex AP-4, epsilon 1                                    |
| V2MM_18606  | NM_029943      | Apex2     | AP endonuclease 2                                                                  |
| V2MM_4538   | NM_026674      | Aph1c     | anterior pharynx defective 1c homolog                                              |
| V2MM_114799 | NM_009693      | Apob      | apolipoprotein B                                                                   |
| V2MM_114796 | NM_009693.2    | Apob      | apolipoprotein B                                                                   |
| V2MM_114797 | NM_009693.2    | Apob      | apolipoprotein B                                                                   |
| V2MM_96120  | NM_001163621.1 | Apol6     | apolipoprotein L 6                                                                 |
| V2MM_18613  | NM_145221      | Appl1     | DIP13 alpha                                                                        |
| V2MM_82528  | NM_009700      | Aqp4      | aquaporin 4                                                                        |
| V2MM_82534  | NM_009702      | Aqr       | aquarius                                                                           |
| V2MM_82041  | NM_007477      | Arf2      | ADP-ribosylation factor 2                                                          |
| V2MM_161114 | NM_181416      | Arhgap11a | Rho GTPase activating protein 11A                                                  |
| V2MM_89137  | NM_176837      | Arhgap18  | Rho GTPase activating protein 18                                                   |
| V2MM_225605 | NM_175535      | Arhgap20  | Rho GTPase activating protein 20                                                   |
| V2MM_88719  | NM_175476      | Arhgap25  | Rho GTPase activating protein 25                                                   |
| V2MM_103151 | NM_175164      | Arhgap26  | Rho GTPase activating protein 26                                                   |
| V2MM_53560  | NM_138630      | Arhgap4   | Rho GTPase activating protein 4                                                    |
| V2MM_194144 | NM_007486      | Arhgdib   | Rho, GDP dissociation inhibitor (GDI) beta                                         |
| V2MM_55052  | NM_001112744.1 | Arhgef16  | Rho guanine nucleotide exchange factor (GEF) 16 (Arhgef16), mRNA                   |
| V2MM_30723  | NM_152801      | Arhgef6   | Rac/Cdc42 guanine nucleotide exchange factor 6                                     |

|             |              |          |                                                                                  |
|-------------|--------------|----------|----------------------------------------------------------------------------------|
| V2MM_64877  | NM_001080819 | Arid1a   | AT rich interactive domain 1A                                                    |
| V2MM_102031 | NM_175251.3  | Arid2    | AT rich interactive domain 2 (ARID, RFX-like) (Arid2), mRNA                      |
| V2MM_32302  | NM_019718    | Arl3     | ADP-ribosylation factor-like 3                                                   |
| V2MM_93992  | NM_182994    | Arl5a    | ADP-ribosylation factor-like 5                                                   |
| V2MM_241125 | NM_207231    | Arl5c    | ADP-ribosylation-like factor 12 protein                                          |
| V2MM_62220  | NM_030066    | Armcx1   | armadillo repeat containing, X-linked 1                                          |
| V2MM_32888  | NM_172309    | Arntl2   | aryl hydrocarbon receptor nuclear translocator-like 2                            |
| V2MM_227618 | NM_177231    | Arrb1    | arrestin, beta 1                                                                 |
| V2MM_82539  | NM_009712    | Arsb     | arylsulfatase B                                                                  |
| V2MM_70419  | NM_026287    | Arxes1   | dipocyte-related X-chromosome expressed sequence 1                               |
| V2MM_56514  | NM_028605    | Asah3l   | alkaline ceramidase 2                                                            |
| V2MM_173376 | NM_001039126 | Asb1     | ankyrin repeat and SOCS box-containing protein 1                                 |
| V2MM_45775  | NM_139152    | Asb18    | ankyrin repeat and SOCS box-containing 18                                        |
| V2MM_51703  | NM_023906    | Asb3     | ankyrin repeat and SOCS box-containing protein 3                                 |
| V2MM_32862  | NM_011791    | Ash2l    | ash2-like                                                                        |
| V2MM_84285  | NM_027435    | Atad2    | ATPase family, AAA domain containing 2                                           |
| V2MM_25461  | NM_174874    | Atg4b    | autophagin 1                                                                     |
| V2MM_194162 | NM_177683    | Atg7     | AGP7                                                                             |
| V2MM_22088  | NM_153389    | Atp10d   | ATPase, Class V, type 10D                                                        |
| V2MM_111529 | NM_001037863 | Atp11c   | Atpase, class VI, type 11C                                                       |
| V2MM_84755  | NM_029097    | Atp13a2  | ATPase type 13A2                                                                 |
| V2MM_27661  | NM_138314    | Atp1b1   | Na <sup>+</sup> /K <sup>+</sup> -ATPase beta 1 subunit                           |
| V2MM_41221  | NM_016774    | Atp5b    | ATP synthase, H <sup>+</sup> transporting mitochondrial F1 complex, beta subunit |
| V2MM_26196  | NM_027439    | Atp6ap2  | ATPase, H <sup>+</sup> transporting, lysosomal accessory protein 2               |
| V2MM_74682  | NM_025494    | Atp6v1c1 | ATPase, H <sup>+</sup> transporting, V1 subunit C, isoform 1                     |
| V2MM_38133  | NM_133699    | Atp6v1c2 | vacuolar H <sup>+</sup> ATPase C2                                                |
| V2MM_33472  | NM_133826    | Atp6v1h  | ATPase, H <sup>+</sup> transporting, lysosomal, V1 subunit H                     |
| V2MM_45162  | NM_009726    | Atp7a    | ATPase, Cu <sup>++</sup> transporting, alpha polypeptide                         |
| V2MM_213050 | NM_001004153 | AU018091 | cationic amino acid transporter 5                                                |
| V2MM_143769 | NM_001033211 | AU022751 | hypothetical protein LOC102991                                                   |
| V2MM_59763  | NM_025338    | Aurkaip1 | Aurora-A kinase interacting protein                                              |
| V2MM_10814  | NM_134067    | AW209491 | hypothetical protein LOC105351                                                   |
| V2MM_101030 | NM_207232    | AW456874 | protein tyrosine phosphatase domain containing 1 protein                         |

|             |                |               |                                                     |
|-------------|----------------|---------------|-----------------------------------------------------|
| V2MM_16328  | NM_172142      | AY078069      | NF-kappa B inhibitor                                |
| V2MM_46660  | NM_009734      | Azi1          | pre-acrosome localization protein 1                 |
| V2MM_15025  | NM_026592      | B230118H07Rik | hypothetical protein LOC68170                       |
| V2MM_160906 | XR_104601.1    | B230369F24Rik | RIKEN cDNA B230369F24 gene                          |
| V2MM_53844  | NM_009735      | B2m           | beta-2-microglobulin                                |
| V2MM_88347  | NM_175383      | B3gnt1        | beta-1,3-N-acetylglucosaminyltransferase bGnT-6     |
| V2MM_32531  | NM_019737      | B4galt6       | UDP-Gal                                             |
| V2MM_41015  | NM_019737      | B4galt6       | UDP-Gal                                             |
| V2MM_32356  | NM_080640      | Baalc         | brain and acute leukemia, cytoplasmic               |
| V2MM_189582 | NM_001163270.1 | Baiap3        | BAI1-associated protein 3                           |
| V2MM_105277 | NM_001001182   | Baz2b         | bromodomain adjacent to zinc finger domain, 2B      |
| V2MM_238855 | NM_001081566   | BB220380      | p87 phosphoinositide 3-kinase gamma adapter protein |
| V2MM_88126  | NM_175325      | Bbs4          | Bardet-Biedl syndrome 4 homolog                     |
| V2MM_93358  | NM_181316      | Bbs9          | Bardet-Biedl syndrome 9                             |
| V2MM_53581  | NM_145964      | BC002199      | hypothetical protein LOC211556                      |
| V2MM_94467  | NM_183162      | BC006779      | hypothetical protein LOC229003                      |
| V2MM_21199  | NM_145410      | BC008155      | hypothetical protein LOC214917                      |
| V2MM_32454  | NM_145601      | BC016201      | hypothetical protein LOC234586                      |
| V2MM_10385  | NM_133214      | BC017612      | hypothetical protein LOC170748                      |
| V2MM_31150  | NM_144927      | BC019943      | hypothetical protein LOC234138                      |
| V2MM_95623  | NM_198108      | BC023055      | hypothetical protein LOC226123                      |
| V2MM_29958  | NM_146082      | BC027072      | hypothetical protein LOC225004                      |
| V2MM_86570  | NM_173732      | BC030440      | hypothetical protein LOC210035                      |
| V2MM_50008  | NM_153568      | BC031901      | hypothetical protein LOC231296                      |
| V2MM_55814  | NM_153795      | BC032204      | UNC-112 related protein 2                           |
| V2MM_151092 | NM_027498      | BC033915      | hypothetical protein LOC70661                       |
| V2MM_34522  | NM_153407      | BC035295      | cDNA sequence BC035295                              |
| V2MM_107330 | NM_001030306   | BC037112      | hypothetical protein LOC231128                      |
| V2MM_55816  | NM_153803      | BC038479      | hypothetical protein LOC244757                      |
| V2MM_49271  | NM_153784      | BC038613      | hypothetical protein LOC212733                      |
| V2MM_160529 | NM_001111317.1 | BC048609      | cDNA sequence BC048609                              |
| V2MM_90132  | NM_177738      | BC048671      | hypothetical protein LOC243535                      |
| V2MM_225243 | NM_183143      | BC048679      | hypothetical protein LOC210321                      |
| V2MM_89309  | NM_177567      | BC049762      | hypothetical protein LOC193286                      |
| V2MM_42647  | NM_172513      | BC049806      | hypothetical protein LOC213056                      |
| V2MM_95734  | NM_198170      | BC059842      | hypothetical protein LOC230676                      |
| V2MM_232988 | NM_199062      | BC062127      | hypothetical protein LOC331188                      |
| V2MM_109865 | NM_001009951   | BC088983      | hypothetical protein LOC382010                      |
| V2MM_95124  | NM_183424      | BC094274      | P518                                                |
| V2MM_51889  | NM_025392      | Bccip         | BRCA2 and CDKN1A interacting protein                |
| V2MM_108383 | NM_025778      | Bcl2l14       | apoptosis regulator BCL-G                           |
| V2MM_69221  | NM_030256      | Bcl9l         | B-cell CLL/lymphoma 9-like                          |
| V2MM_10086  | NM_029791      | Bicd2         | bicaudal D homolog 2                                |

|             |                |               |                                                                 |
|-------------|----------------|---------------|-----------------------------------------------------------------|
| V2MM_48748  | NM_080708      | Bmp2k         | BMP2 inducible kinase                                           |
| V2MM_41166  | NM_016787      | Bnip2         | BCL2/adenovirus E1B 19kDa-interacting protein 1, NIP2           |
| V2MM_112688 | NM_001113367.1 | Boll          | bol, boule-like (Drosophila) (Boll), transcript variant 2, mRNA |
| V2MM_90743  | NM_177850      | Bpi           | bactericidal/permeability-increasing protein                    |
| V2MM_91465  | NM_178309      | Brip1         | BRCA1 interacting protein C-terminal helicase 1                 |
| V2MM_3043   | NM_018819      | Brp44l        | brain protein 44-like                                           |
| V2MM_30439  | NM_001003920   | Brsk1         | serine/threonine kinase SADB                                    |
| V2MM_197570 | NM_001081038   | Btbd16        | BTB (POZ) domain containing 16                                  |
| V2MM_36085  | NM_028125      | Btbd4         | BTB (POZ) domain containing 4                                   |
| V2MM_99484  | NM_007569      | Btg1          | B-cell translocation gene 1, anti-proliferative                 |
| V2MM_875    | NM_001037719   | Btla          | B and T lymphocyte associated                                   |
| V2MM_97513  | NM_201405      | Btnl1         | butyrophilin-like 1                                             |
| V2MM_224462 | NM_175411      | C030004A17Rik | hypothetical protein LOC109229                                  |
| V2MM_194548 | NM_174868      | C030011O14Rik | hypothetical protein LOC215708                                  |
| V2MM_227363 | XR_106356.1    | C130046K22Rik | RIKEN cDNA C130046K22 gene                                      |
| V2MM_89742  | NM_177661      | C130079G13Rik | hypothetical protein LOC229333                                  |
| V2MM_88098  | NM_175319      | C330005M16Rik | hypothetical protein LOC101744                                  |
| V2MM_196197 | NM_177712      | C330011K17Rik | hypothetical protein LOC238692                                  |
| V2MM_90008  | NM_177712      | C330011K17Rik | hypothetical protein LOC238692                                  |
| V2MM_53491  | NM_172616      | C330027C09Rik | hypothetical protein LOC224171                                  |
| V2MM_59657  | NM_145855      | C330046G03Rik | RIKEN cDNA C330046G03                                           |
| V2MM_234392 | NM_001033314   | C530028I08Rik | hypothetical protein LOC232933                                  |
| V2MM_94404  | NM_183148      | C79267        | hypothetical protein LOC212632                                  |
| V2MM_191571 | NM_172549      | Cabin1        | calcineurin binding protein 1                                   |
| V2MM_193205 | NM_172549      | Cabin1        | calcineurin binding protein 1                                   |
| V2MM_31647  | NM_020263      | Cacna2d2      | calcium channel, voltage-dependent, alpha 2/delta subunit 2     |
| V2MM_20701  | NM_146123      | Cacnb4        | calcium channel, voltage-dependent, beta 4 subunit              |
| V2MM_72488  | NM_178721      | Cadm2         | immunoglobulin superfamily, member 4D                           |
| V2MM_159470 | NM_027724      | Cage1         | cancer antigen 1                                                |
| V2MM_33845  | NM_138304      | Calml4        | calmodulin-like 4                                               |
| V2MM_99578  | NM_027994.1    | Cand1         | cullin associated and neddylation disassociated 1               |
| V2MM_9580   | NM_007597      | Canx          | calnexin                                                        |
| V2MM_51249  | NM_016739      | Caprin1       | cell cycle associated protein 1                                 |
| V2MM_195301 | NM_178396      | Car12         | carbonic anhydrase 12                                           |
| V2MM_48299  | NM_139305      | Car9          | carbonic anhydrase 9                                            |
| V2MM_85391  | NM_134148      | Carns1        | carnosine synthase 1                                            |
| V2MM_61685  | NM_009806      | Cask          | calcium/calmodulin-dependent serine protein kinase              |
| V2MM_65495  | NM_009809      | Casp14        | caspase 14                                                      |
| V2MM_40228  | NM_011997      | Casp8ap2      | caspase 8 associated protein 2                                  |

|             |                |          |                                                         |
|-------------|----------------|----------|---------------------------------------------------------|
| V2MM_78733  | NM_009813      | Casq1    | calsequestrin 1                                         |
| V2MM_194973 | NM_026201      | Ccar1    | cell division cycle and apoptosis regulator 1           |
| V2MM_224699 | NM_178793      | Ccbe1    | collagen and calcium binding EGF domains 1              |
| V2MM_92878  | NM_178793      | Ccbe1    | collagen and calcium binding EGF domains 1              |
| V2MM_83854  | NM_025740      | Ccdc104  | coiled-coil domain containing 104                       |
| V2MM_194967 | NM_175369      | Ccdc122  | coiled-coil domain containing 122                       |
| V2MM_29560  | NM_028120      | Ccdc123  | coiled-coil domain containing 123                       |
| V2MM_22298  | NM_024201      | Ccdc127  | coiled-coil domain containing 127                       |
| V2MM_23380  | NM_146089      | Ccdc5    | coiled-coil domain containing 5                         |
| V2MM_54662  | NM_029061      | Ccdc7    | coiled-coil domain containing 7                         |
| V2MM_94755  | NM_183250      | Ccdc72   | coiled-coil domain containing 72                        |
| V2MM_262325 | NM_201372      | Ccdc84   | coiled-coil domain containing 84                        |
| V2MM_234285 | NM_176841      | Ccdc88a  | Hook-related protein 1                                  |
| V2MM_23631  | NM_027567      | Ccdc93   | coiled-coil domain containing 93                        |
| V2MM_26619  | NM_027567      | Ccdc93   | coiled-coil domain containing 93                        |
| V2MM_40154  | NM_020279      | Ccl28    | chemokine (C-C motif) ligand 28                         |
| V2MM_70164  | NM_013653      | Ccl5     | chemokine (C-C motif) ligand 5                          |
| V2MM_47467  | NM_145700      | Ccr1     | chemokine (C-C motif) receptor-like 1                   |
| V2MM_34614  | NM_024291      | CD1      | kyphoscoliosis                                          |
| V2MM_67339  | NM_009841      | Cd14     | CD14 antigen                                            |
| V2MM_21148  | NM_026862      | Cd177    | CD177 antigen                                           |
| V2MM_74955  | NM_018729      | Cd244    | CD244 natural killer cell receptor 2B4                  |
| V2MM_71093  | NM_021893      | Cd274    | CD274 antigen                                           |
| V2MM_214362 | NM_009855      | Cd80     | CD80 antigen precursor                                  |
| V2MM_202899 | NM_026891      | Cdan1    | congenital dyserythropoietic anemia, type I             |
| V2MM_190061 | NM_183016      | Cdc42bpb | Cdc42 binding protein kinase beta                       |
| V2MM_105676 | NM_001004721   | Cdc91i1  | cell division cycle 91-like 1                           |
| V2MM_25415  | NM_146040      | Cdca7l   | transcription factor RAM2                               |
| V2MM_38342  | NM_020260      | Cdgap    | Cdc42 GTPase-activating protein                         |
| V2MM_205382 | NM_001008420   | Cdh12    | cadherin 12                                             |
| V2MM_33629  | NM_019753      | Cdh17    | cadherin 17                                             |
| V2MM_203187 | NM_001081386   | Cdh19    | cadherin 19, type 2                                     |
| V2MM_46414  | NM_001033373.2 | Cdk15    | cyclin-dependent kinase 15                              |
| V2MM_68735  | NM_030248      | Cdk5rap3 | CDK5 regulatory subunit associated protein 3            |
| V2MM_171190 | NM_009874.3    | Cdk7     | cyclin-dependent kinase 7                               |
| V2MM_55876  | NM_016912      | Cdkl2    | cyclin-dependent kinase-like 2 (CDC2-related kinase)    |
| V2MM_59449  | NM_177036      | Ceacam19 | carcinoembryonic antigen-like 1                         |
| V2MM_25381  | NM_009884      | Cebpg    | CCAAT/enhancer binding protein gamma                    |
| V2MM_27203  | NM_144815      | Cecr5    | cat eye syndrome chromosome region, candidate 5 homolog |

|             |                |         |                                                              |
|-------------|----------------|---------|--------------------------------------------------------------|
| V2MM_56950  | NM_017392      | Celsr2  | cadherin EGF LAG seven-pass G-type receptor 2                |
| V2MM_104294 | NM_001081363   | Cenpf   | leucine, glutamic acid, lysine family 1 protein              |
| V2MM_55156  | NM_172723      | Centa1  | centaurin, alpha 1                                           |
| V2MM_233564 | NM_001039184.1 | Cep350  | centrosomal protein 350                                      |
| V2MM_46807  | NM_145825      | Cetn4   | centrin 4                                                    |
| V2MM_53598  | NM_025336      | Chchd3  | coiled-coil-helix-coiled-coil-helix domain containing 3      |
| V2MM_60645  | NM_025336      | Chchd3  | coiled-coil-helix-coiled-coil-helix domain containing 3      |
| V2MM_101581 | NM_201637      | Chd8    | chromodomain helicase DNA binding protein 8                  |
| V2MM_38177  | NM_172264      | Chdh    | choline dehydrogenase                                        |
| V2MM_53937  | NM_021350      | Chml    | choroideremia-like                                           |
| V2MM_77900  | NM_029362      | Chmp4b  | chromatin modifying protein 4B                               |
| V2MM_80697  | NM_025519      | Chmp4c  | chromatin modifying protein 4C                               |
| V2MM_206093 | NM_001085498.2 | Chmp6   | chromatin modifying protein 6                                |
| V2MM_110662 | NM_176844.4    | Chrna5  | cholinergic receptor, nicotinic, alpha polypeptide 5         |
| V2MM_56277  | NM_021369      | Chrna6  | cholinergic receptor, nicotinic, alpha polypeptide 6         |
| V2MM_54288  | NM_009601      | Chrbn1  | cholinergic receptor, nicotinic, beta polypeptide 1 (muscle) |
| V2MM_25919  | NM_011998      | Chst4   | carbohydrate (chondroitin 6/keratan) sulfotransferase 4      |
| V2MM_261757 | NM_139148      | Clca4   | chloride channel calcium activated 4                         |
| V2MM_21797  | NM_011999      | Clec4a2 | C-type lectin domain family 4, member a2                     |
| V2MM_73809  | NM_009907      | Cln3    | ceroid-lipofuscinosis, neuronal 3                            |
| V2MM_104245 | NM_030131.3    | Cnih4   | cornichon homolog 4 (Drosophila) (Cnih4), mRNA               |
| V2MM_80369  | NM_011135      | Cnot7   | CCR4-NOT transcription complex, subunit 7                    |
| V2MM_57319  | NM_017383      | Cntn6   | contactin 6                                                  |
| V2MM_193635 | NM_001004357   | Cntnap2 | contactin associated protein-like 2                          |
| V2MM_36847  | NM_130457      | Cntnap4 | contactin associated protein 4                               |
| V2MM_57737  | NM_177025      | Cobl1   | Cobl-like 1                                                  |
| V2MM_83922  | NM_026225      | Cog6    | component of oligomeric golgi complex 6                      |
| V2MM_236717 | NM_028518.1    | Col20a1 | collagen, type XX, alpha 1                                   |
| V2MM_62061  | NM_009933      | Col6a1  | procollagen, type VI, alpha 1                                |
| V2MM_33417  | NM_130449      | Colec12 | collectin sub-family member 12                               |
| V2MM_13146  | NM_144514      | Commd1  | COMM domain containing 1                                     |
| V2MM_4921   | NM_144514      | Commd1  | COMM domain containing 1                                     |
| V2MM_225136 | NM_175095      | Commd2  | COMM domain containing 2                                     |
| V2MM_74514  | NM_033370      | Copb1   | coatamer protein complex, subunit beta 1                     |

|             |             |               |                                                        |
|-------------|-------------|---------------|--------------------------------------------------------|
| V2MM_83454  | NM_015827   | Copb2         | coatamer protein complex, subunit beta 2 (beta prime)  |
| V2MM_55446  | NM_172687   | Coq3          | coenzyme Q3 homolog, methyltransferase                 |
| V2MM_59005  | NM_172582   | Coq6          | coenzyme Q6 homolog                                    |
| V2MM_61651  | NM_009944   | Cox7a1        | cytochrome c oxidase, subunit VIIa 1                   |
| V2MM_41963  | NM_175937   | Cpeb2         | cytoplasmic polyadenylation element binding protein 2  |
| V2MM_75309  | NM_009947   | Cpne6         | copine VI                                              |
| V2MM_36296  | NM_026896   | Crsp8         | transcriptional co-activator CRSP8 homolog             |
| V2MM_16989  | NM_019465   | Crtam         | cytotoxic and regulatory T cell molecule               |
| V2MM_35455  | NM_019922   | Crtap         | cartilage associated protein                           |
| V2MM_60796  | NM_016669   | Crym          | crystallin, mu                                         |
| V2MM_232314 | NM_026493   | Cspp1         | centrosome and spindle pole associated protein 1       |
| V2MM_30948  | NM_146012   | Ctdsp2        | Nuclear LIM interactor-interacting factor 2            |
| V2MM_65513  | NM_025680   | Ctnnb1        | nuclear protein NAP                                    |
| V2MM_67701  | NM_009982   | Ctsc          | cathepsin C                                            |
| V2MM_66202  | NM_022326   | Ctsm          | cathepsin M                                            |
| V2MM_51439  | NM_016716   | Cul3          | cullin 3                                               |
| V2MM_81202  | NM_011339   | Cxcl15        | chemokine (C-X-C motif) ligand 15                      |
| V2MM_93279  | NM_180962   | Cyhr1         | cysteine and histidine rich 1                          |
| V2MM_99590  | NM_010009   | Cyp27b1       | cytochrome P450, family 27, subfamily b, polypeptide 1 |
| V2MM_28098  | NM_133657   | Cyp2a12       | cytochrome P450, family 2, subfamily a, polypeptide 12 |
| V2MM_25812  | NM_145548   | Cyp2j13       | cytochrome P450, family 2, subfamily j, polypeptide 13 |
| V2MM_47839  | NM_010007   | Cyp2j5        | cytochrome P450, family 2, subfamily j, polypeptide 5  |
| V2MM_66647  | NM_177382   | Cyp2r1        | cytochrome P450, family 2, subfamily r, polypeptide 1  |
| V2MM_73892  | NM_177382   | Cyp2r1        | cytochrome P450, family 2, subfamily r, polypeptide 1  |
| V2MM_51804  | NM_010010   | Cyp46a1       | cytochrome P450, family 46, subfamily a, polypeptide 1 |
| V2MM_173152 | XR_104532.1 | D030040B21Rik | RIKEN cDNA D030040B21 gene                             |
| V2MM_38660  | NM_145422   | D10Wsu52e     | hypothetical protein LOC28088                          |
| V2MM_52641  | NM_145959   | D15Ert621e    | hypothetical protein LOC210998                         |
| V2MM_97528  | NM_033477   | D17H6S53E     | G4 protein                                             |
| V2MM_57988  | NM_177140   | D230037D09Rik | hypothetical protein LOC320351                         |
| V2MM_59787  | NM_172727   | D330028D13Rik | hypothetical protein LOC231946                         |
| V2MM_90983  | NM_177899   | D330038O06Rik | hypothetical protein LOC330788                         |
| V2MM_87930  | NM_175275   | D530005L17Rik | hypothetical protein LOC338349                         |
| V2MM_89730  | NM_177657   | D630003M21Rik | hypothetical protein LOC228846                         |



|             |                |               |                                                                                                     |
|-------------|----------------|---------------|-----------------------------------------------------------------------------------------------------|
| V2MM_92525  | NM_178727      | D630039A03Rik | hypothetical protein LOC242484                                                                      |
| V2MM_92526  | NM_178727      | D630039A03Rik | hypothetical protein LOC242484                                                                      |
| V2MM_27284  | NM_172433      | D730001G18Rik | hypothetical protein LOC78725                                                                       |
| V2MM_105048 | NM_030021      | D730039F16Rik | hypothetical protein LOC77996                                                                       |
| V2MM_88881  | NM_175518      | D730040F13Rik | hypothetical protein LOC242474                                                                      |
| V2MM_59639  | NM_177335      | D930020B18Rik | hypothetical protein LOC216393                                                                      |
| V2MM_51497  | NM_177259      | Dab1          | disabled homolog 1                                                                                  |
| V2MM_30400  | NM_011932      | Dapp1         | dual adaptor for phosphotyrosine and 3-phosphoinositides 1                                          |
| V2MM_43628  | NM_010045      | Darc          | Duffy blood group                                                                                   |
| V2MM_251701 | NM_178788      | Dctd          | dCMP deaminase                                                                                      |
| V2MM_59532  | NM_016890      | Dctn3         | dynactin 3                                                                                          |
| V2MM_68084  | NM_010026      | Ddef1         | development and differentiation enhancing                                                           |
| V2MM_203261 | NM_001003919   | Ddx11         | DEAD/H (Asp-Glu-Ala-Asp/His) box polypeptide 11 (CHL1-like helicase homolog, <i>S. cerevisiae</i> ) |
| V2MM_33220  | NM_172284      | Ddx19b        | DDX19 homolog                                                                                       |
| V2MM_5503   | NM_153065      | Ddx27         | DEAD (Asp-Glu-Ala-Asp) box polypeptide 27                                                           |
| V2MM_14437  | NM_028038      | Ddx28         | DEAD (Asp-Glu-Ala-Asp) box polypeptide 28                                                           |
| V2MM_64760  | NM_010028      | Ddx3x         | DEAD/H (Asp-Glu-Ala-Asp/His) box polypeptide 3, X-linked                                            |
| V2MM_68164  | NM_025748      | Deadc1        | deaminase domain containing 1                                                                       |
| V2MM_7040   | NM_054046      | Def8          | differentially expressed in FDCP 8                                                                  |
| V2MM_94061  | NM_183026      | Defb14        | defensin beta 14                                                                                    |
| V2MM_94110  | NM_183035      | Defb34        | defensin beta 34                                                                                    |
| V2MM_225914 | NM_183124      | Defb41        | defensin beta 41                                                                                    |
| V2MM_6621   | NM_007844      | Defcr-rs1     | defensin related sequence cryptdin peptide (paneth cells)                                           |
| V2MM_23420  | NM_146122      | Dennd1a       | DENN/MADD domain containing 1A                                                                      |
| V2MM_106181 | NM_028110      | Dennd2d       | DENN/MADD domain containing 2D                                                                      |
| V2MM_47654  | NM_010048      | Dgcr2         | DiGeorge syndrome protein C                                                                         |
| V2MM_227341 | NM_001013013   | Dhrs7c        | dehydrogenase/reductase (SDR family) member 7C                                                      |
| V2MM_91559  | NM_178380      | Dhx38         | DEAH (Asp-Glu-Ala-His) box polypeptide 38                                                           |
| V2MM_2205   | NM_023232      | Diablo        | diablo                                                                                              |
| V2MM_37119  | NM_019670      | Diap3         | diaphanous homolog 3                                                                                |
| V2MM_22334  | NM_015802      | Dlc1          | deleted in liver cancer 1                                                                           |
| V2MM_87145  | NM_175033      | Dll3          | delta-like 3                                                                                        |
| V2MM_43222  | NM_010055      | Dlx3          | distal-less homeobox 3                                                                              |
| V2MM_74758  | NM_028772      | Dmgdh         | dimethylglycine dehydrogenase                                                                       |
| V2MM_64961  | NM_172899      | Dmkn          | dermokine                                                                                           |
| V2MM_85443  | NM_145831      | Dmrt2         | terra                                                                                               |
| V2MM_108131 | NM_001164669.1 | Dnahc6        | dynein, axonemal, heavy chain 6                                                                     |

|             |              |               |                                                                         |
|-------------|--------------|---------------|-------------------------------------------------------------------------|
| V2MM_21113  | NM_020266    | Dnajb10       | DnaJ (Hsp40) homolog, subfamily B, member 10                            |
| V2MM_34672  | NM_011847    | Dnajb6        | DnaJ (Hsp40) homolog, subfamily B, member 6                             |
| V2MM_67082  | NM_013760    | Dnajb9        | DnaJ (Hsp40) homolog, subfamily B, member 9                             |
| V2MM_201500 | NM_007869.3  | Dnajc1        | DnaJ (Hsp40)                                                            |
| V2MM_23036  | NM_153413    | Dock3         | dedicator of cyto-kinesis 3                                             |
| V2MM_90347  | NM_177780    | Dock5         | dedicator of cytokinesis 5                                              |
| V2MM_59041  | NM_177030    | Dock6         | dedicator of cytokinesis 6                                              |
| V2MM_235070 | NM_001033366 | Dpcr1         | diffuse panbronchiolitis critical region 1                              |
| V2MM_51462  | NM_010073    | Dpm2          | dolichol-phosphate (beta-D) mannosyltransferase 2                       |
| V2MM_207901 | NM_026854    | Dtwd2         | DTW domain containing 2                                                 |
| V2MM_30902  | NM_024438    | Dusp19        | dual specificity phosphatase 19                                         |
| V2MM_31744  | NM_024438    | Dusp19        | dual specificity phosphatase 19                                         |
| V2MM_34250  | NM_028207    | Dusp3         | dual specificity phosphatase 3 (vaccinia virus phosphatase VH1-related) |
| V2MM_216530 | NM_010091    | Dvl1          | dishevelled, dsh homolog 1                                              |
| V2MM_134038 | XR_104926.1  | E130018O15Rik | RIKEN cDNA E130018O15 gene                                              |
| V2MM_42679  | NM_172726    | E130309D02Rik | hypothetical protein LOC231868                                          |
| V2MM_90772  | NM_177856    | E130311K13Rik | hypothetical protein LOC329659                                          |
| V2MM_88930  | NM_175528    | E330009J07Rik | hypothetical protein LOC243780                                          |
| V2MM_87065  | NM_175011    | E330017A01Rik | hypothetical protein LOC224247                                          |
| V2MM_116476 | NM_001033214 | E330034G19Rik | hypothetical protein LOC105418                                          |
| V2MM_224719 | NM_178668    | E430028B21Rik | 2'-phosphodiesterase                                                    |
| V2MM_72568  | NM_053113    | Ear11         | eosinophil-associated, ribonuclease A family, member 11                 |
| V2MM_57608  | NM_010095    | Ebf2          | early B-cell factor 2                                                   |
| V2MM_31795  | NM_026932    | Ebna1bp2      | EBNA1 binding protein 2                                                 |
| V2MM_45458  | NM_139293    | Ece2          | endothelin converting enzyme 2                                          |
| V2MM_47013  | NM_153799    | Edc3          | enhancer of mRNA decapping 3                                            |
| V2MM_65519  | NM_025769    | Efcab1        | EF hand calcium binding domain 1                                        |
| V2MM_42600  | NM_010107    | Efna1         | ephrin A1                                                               |
| V2MM_43441  | NM_010110    | Efnb1         | ephrin B1                                                               |
| V2MM_55345  | NM_010111    | Efnb2         | ephrin B2                                                               |
| V2MM_89890  | NM_177689    | EG232599      | hypothetical protein LOC232599                                          |
| V2MM_129676 | NM_001037745 | EG244556      | zinc finger protein 791                                                 |
| V2MM_90512  | NM_177808    | EG328231      | hypothetical protein LOC328231                                          |
| V2MM_261562 | NM_001004158 | EG380907      | hypothetical protein LOC380907                                          |
| V2MM_262138 | NM_001013816 | EG434459      | hypothetical protein LOC434459                                          |
| V2MM_35672  | NM_019918    | EG56544       | calcium-sensing receptor like 1                                         |
| V2MM_113091 | NM_001039219 | EG619597      | hypothetical protein LOC619597                                          |
| V2MM_33844  | NM_007915    | Ei24          | etoposide induced 2.4                                                   |
| V2MM_76597  | NM_025613    | Eid1          | CREBBP/EP300 inhibitory protein 1                                       |

|             |             |                    |                                                                          |
|-------------|-------------|--------------------|--------------------------------------------------------------------------|
| V2MM_35731  | NM_172265   | Eif2b5             | eukaryotic translation initiation factor 2B, subunit 5 epsilon           |
| V2MM_31712  | NM_153402   | Eif2c3             | eukaryotic translation initiation factor 2C, 3                           |
| V2MM_102279 | NM_008388   | Eif3s6             | eukaryotic translation initiation factor 3, subunit 6                    |
| V2MM_85307  | NM_133916   | Eif3s9             | eukaryotic translation initiation factor 3, subunit 9                    |
| V2MM_66139  | NM_053255   | Elac1              | elaC homolog 1                                                           |
| V2MM_24543  | NM_007922   | Elk1               | ELK1, member of ETS oncogene family                                      |
| V2MM_26232  | NM_007922   | Elk1               | ELK1, member of ETS oncogene family                                      |
| V2MM_92580  | NM_178736   | Elmod2             | ELMO domain containing 2                                                 |
| V2MM_36281  | NM_007925   | Eln                | elastin                                                                  |
| V2MM_56885  | NM_139138   | Emr4               | EGF-like module containing, mucin-like, hormone receptor-like sequence 4 |
| V2MM_44806  | NM_008813   | Enpp1              | ectonucleotide pyrophosphatase/phosphodiesterase 1                       |
| V2MM_53976  | NM_009529   | ENSMUSG00000073257 | Xlr-related, meiosis regulated                                           |
| V2MM_57898  | NM_009529   | ENSMUSG00000073257 | Xlr-related, meiosis regulated                                           |
| V2MM_194397 | NM_175009   | Eny2               | e(y)2 protein                                                            |
| V2MM_83355  | NM_013511   | Epb4.12            | erythrocyte protein band 4.1-like 2                                      |
| V2MM_20596  | NM_007935   | Epc1               | enhancer of polycomb homolog 1                                           |
| V2MM_21721  | NM_007936   | Epha4              | Eph receptor A4                                                          |
| V2MM_37727  | NM_007940   | Ephx2              | epoxide hydrolase 2, cytoplasmic                                         |
| V2MM_224463 | NM_177814   | Erc2               | CAZ-associated structural protein                                        |
| V2MM_46084  | NM_010155   | Erf                | Ets2 repressor factor                                                    |
| V2MM_67317  | NM_026129   | Erp29              | endoplasmic reticulum protein ERp29                                      |
| V2MM_30715  | NM_133660   | Es22               | esterase 22                                                              |
| V2MM_195077 | NM_198103   | Exoc8              | exocyst complex component 8                                              |
| V2MM_35054  | NM_027698   | Exod1              | exonuclease domain containing 1                                          |
| V2MM_30713  | NM_007969   | Expi               | extracellular proteinase inhibitor                                       |
| V2MM_53522  | NM_010167   | Eya4               | eyes absent 4 homolog                                                    |
| V2MM_39639  | NM_007983   | Faf1               | Fas-associated factor 1                                                  |
| V2MM_116036 | XM_138722.6 | Fam81b             | family with sequence similarity 81, member B                             |
| V2MM_232186 | XM_138722.6 | Fam81b             | family with sequence similarity 81, member B                             |
| V2MM_90951  | NM_177893   | Fan1               | FANCD2/FANCI-associated nuclease 1                                       |
| V2MM_87125  | NM_175027   | Fancb              | Fanconianemia, complementation group B                                   |
| V2MM_26531  | NM_007992   | Fbln2              | fibulin 2                                                                |

|             |             |        |                                                                     |
|-------------|-------------|--------|---------------------------------------------------------------------|
| V2MM_34692  | NM_011812   | Fbln5  | fibulin 5                                                           |
| V2MM_28354  | NM_133940   | Fbxl14 | F-box and leucine-rich repeat protein 14                            |
| V2MM_101064 | NM_178674   | Fbxl21 | F-box and leucine-rich repeat protein 21                            |
| V2MM_99020  | NM_027968   | Fbxo30 | F-box protein 30                                                    |
| V2MM_99021  | NM_027968   | Fbxo30 | F-box protein 30                                                    |
| V2MM_103130 | NM_199448   | Fez2   | fasciculation and elongation protein zeta 2 (zygin II)              |
| V2MM_225450 | NM_194057   | Ffar1  | G protein-coupled receptor 40                                       |
| V2MM_18349  | NM_030614   | Fgf16  | fibroblast growth factor 16                                         |
| V2MM_73385  | NM_008006   | Fgf2   | fibroblast growth factor 2                                          |
| V2MM_84535  | NM_028263   | Fgfbp3 | fibroblast growth factor binding protein 3                          |
| V2MM_33960  | NM_133862   | Fgg    | fibrinogen, gamma polypeptide                                       |
| V2MM_54488  | NM_010211   | Fhl1   | four and a half LIM domains 1                                       |
| V2MM_87936  | NM_175276   | Fhod3  | formin-family protein FHOS2                                         |
| V2MM_93014  | NM_178887   | Fibcd1 | fibrinogen C domain containing 1                                    |
| V2MM_24962  | NM_024183   | Fip1l1 | FIP1 like 1                                                         |
| V2MM_31783  | NM_024183   | Fip1l1 | FIP1 like 1                                                         |
| V2MM_45855  | NM_153573   | Fkbp14 | FK506 binding protein 14                                            |
| V2MM_50562  | NM_153573   | Fkbp14 | FK506 binding protein 14                                            |
| V2MM_25609  | NM_019873   | Fkbp1  | WAF-1/CIP1 stabilizing protein 39                                   |
| V2MM_57419  | NM_010228   | Flt1   | FMS-like tyrosine kinase 1                                          |
| V2MM_41674  | NM_010229   | Flt3   | FMS-like tyrosine kinase 3                                          |
| V2MM_25417  | NM_145447   | Flvcr2 | feline leukemia virus subgroup C cellular receptor family, member 2 |
| V2MM_56618  | NM_010230   | Fmn1   | formin 1                                                            |
| V2MM_30592  | NM_019679   | Fmn1   | formin-like 1                                                       |
| V2MM_56339  | NM_022014   | Fn3k   | fructosamine 3 kinase                                               |
| V2MM_78212  | NM_008033   | Fnta   | farnesyltransferase, CAAX box, alpha                                |
| V2MM_71075  | NM_008035   | Folr2  | folate receptor 2 (fetal)                                           |
| V2MM_30793  | NM_008592   | Foxc1  | forkhead box C1                                                     |
| V2MM_200870 | NM_180974.4 | Foxn2  | forkhead box N2                                                     |
| V2MM_95171  | NM_194060   | Foxo6  | forkhead box O6                                                     |
| V2MM_80044  | NM_172862   | Frem2  | Fras1 related extracellular matrix protein 2                        |
| V2MM_67798  | NM_011356   | Frzb   | frizzled-related protein                                            |
| V2MM_54996  | NM_177059   | Fstl4  | follistatin-like 4                                                  |
| V2MM_59518  | NM_139149   | Fus    | pigpen                                                              |
| V2MM_54196  | NM_022004   | Fxyd6  | FXYD domain-containing ion transport regulator 6                    |
| V2MM_49005  | NM_020510   | Fzd2   | frizzled 2                                                          |
| V2MM_916    | NM_153073   | Gab3   | growth factor receptor bound protein 2-associated protein 3         |
| V2MM_71205  | NM_008065   | Gabpa  | GA repeat binding protein, alpha                                    |
| V2MM_71012  | NM_008066   | Gabra2 | gamma-aminobutyric acid (GABA-A) receptor, subunit alpha 2          |

|             |                |         |                                                                   |
|-------------|----------------|---------|-------------------------------------------------------------------|
| V2MM_65176  | NM_008071      | Gabrb3  | gamma-aminobutyric acid (GABA) A receptor, beta 3                 |
| V2MM_236555 | NM_008084      | Gapdh   | glyceraldehyde-3-phosphate dehydrogenase                          |
| V2MM_51690  | NM_172692      | Gba2    | bile acid beta-glucosidase                                        |
| V2MM_99273  | NM_027375      | Gcc2    | GRIP and coiled-coil domain-containing 2                          |
| V2MM_227046 | NM_010272      | Gdf11   | growth differentiation factor 11                                  |
| V2MM_41165  | NM_010275      | Gdnf    | glial cell line derived neurotrophic factor                       |
| V2MM_42643  | NM_010275      | Gdnf    | glial cell line derived neurotrophic factor                       |
| V2MM_57513  | NM_010278      | Gfi1    | growth factor independent 1                                       |
| V2MM_53656  | NM_027819      | Ggt6    | gamma-glutamyltransferase 6                                       |
| V2MM_54277  | NM_010285      | Ghrh    | growth hormone releasing hormone                                  |
| V2MM_70807  | NM_025466      | Gkn1    | gastrokine 1                                                      |
| V2MM_104636 | NM_029010.1    | Glb1l   | galactosidase, beta 1-like                                        |
| V2MM_111857 | NM_001081125   | Gli2    | GLI-Kruppel family member GLI2                                    |
| V2MM_58663  | NM_010298      | Glrb    | glycine receptor, beta subunit                                    |
| V2MM_104977 | NM_001039095   | Glt6d1  | galactosyltransferase family 6 domain containing 1                |
| V2MM_47820  | NM_153601      | Glud1   | glutamate-ammonia ligase (glutamine synthase) domain containing 1 |
| V2MM_162350 | XM_003084703.1 | Gm10295 | predicted gene 10295                                              |
| V2MM_232577 | XM_003085421.1 | Gm10931 | predicted gene 10931                                              |
| V2MM_114508 | XR_106221.1    | Gm12248 | predicted gene 12248                                              |
| V2MM_114509 | XR_106221.1    | Gm12248 | predicted gene 12248                                              |
| V2MM_133800 | NM_001085549.1 | Gm12824 | predicted gene 12824                                              |
| V2MM_106587 | NM_001033255   | Gm136   | hypothetical protein LOC214568                                    |
| V2MM_108370 | NM_001014997   | Gm156   | killer cell lectin-like receptor subfamily H, member 1            |
| V2MM_231593 | NM_001166601.1 | Gm16430 | predicted gene 16430                                              |
| V2MM_113929 | XM_001475544.2 | Gm3055  | predicted gene 3055                                               |
| V2MM_120131 | XM_003085242.1 | Gm340   | predicted gene 340                                                |
| V2MM_125597 | NM_001085504.1 | Gm436   | predicted gene 436                                                |
| V2MM_118360 | NM_177596.3    | Gm4769  | predicted gene 4769                                               |
| V2MM_114220 | XM_137324.3    | Gm4801  | predicted gene 4801                                               |
| V2MM_205058 | XM_136255.4    | Gm4845  | predicted gene 4845                                               |
| V2MM_239119 | XR_106171.1    | Gm4890  | predicted gene 4890                                               |
| V2MM_239750 | XM_003085289.1 | Gm4916  | predicted gene 4916                                               |
| V2MM_37238  | NM_177706.4    | Gm4922  | predicted gene 4922                                               |
| V2MM_209014 | XM_001477831.2 | Gm5165  | predicted gene 5165                                               |
| V2MM_172032 | XM_488772.3    | Gm5482  | predicted gene 5482                                               |
| V2MM_233684 | NM_001013820.3 | Gm5631  | predicted gene 5631                                               |
| V2MM_108391 | NM_001185040.1 | Gm5885  | predicted gene 5885                                               |
| V2MM_209467 | NM_001195674.1 | Gm600   | predicted gene 600                                                |
| V2MM_213015 | XM_003084661.1 | Gm6590  | predicted gene 6590                                               |

|             |                |            |                                                                             |
|-------------|----------------|------------|-----------------------------------------------------------------------------|
| V2MM_108378 | XM_132900.6    | Gm6619     | predicted gene 6619                                                         |
| V2MM_241072 | XM_003084615.1 | Gm6647     | predicted gene 6647                                                         |
| V2MM_140130 | XM_001472529.1 | Gm7489     | predicted gene 7489                                                         |
| V2MM_148033 | XR_105120.1    | Gm7710     | predicted gene 7710                                                         |
| V2MM_232374 | XR_105401.1    | Gm8117     | predicted gene 8117                                                         |
| V2MM_103267 | NM_001004061   | Gm93       | hypothetical protein LOC225497                                              |
| V2MM_108717 | XR_033994.2    | Gm9519     | predicted gene 9519                                                         |
| V2MM_177870 | XM_001474362.2 | Gm9524     | predicted gene 9524                                                         |
| V2MM_162382 | XM_003084711.1 | Gm9990     | predicted gene 9990                                                         |
| V2MM_55733  | NM_020567      | Gmnn       | geminin                                                                     |
| V2MM_16374  | NM_177992      | Gmpr2      | guanosine monophosphate reductase 2                                         |
| V2MM_82760  | NM_010306      | Gnai3      | guanine nucleotide binding protein, alpha inhibiting 3                      |
| V2MM_58698  | NM_025331      | Gng11      | guanine nucleotide binding protein gamma 11                                 |
| V2MM_74344  | NM_010316      | Gng3       | guanine nucleotide binding protein (G protein), gamma 3 subunit             |
| V2MM_56273  | NM_172529      | Gnptg      | M6PR domain-containing protein 1                                            |
| V2MM_84599  | NM_028487      | Gbp1       | G+C-rich promoter-binding protein                                           |
| V2MM_31597  | NM_175500      | Gpc5       | glypican 5                                                                  |
| V2MM_21014  | NM_130453      | Gpha2      | glycoprotein hormone alpha 2                                                |
| V2MM_37783  | NM_175644      | Gphb5      | glycoprotein hormone beta 5                                                 |
| V2MM_92710  | NM_178760      | Gpr107     | expressed sequence AI790205                                                 |
| V2MM_102833 | NM_001081178   | Gpr116     | G protein-coupled receptor 116                                              |
| V2MM_93747  | NM_181751      | Gpr119     | G-protein coupled receptor 119                                              |
| V2MM_99098  | NM_001002268   | Gpr126     | G protein-coupled receptor 126                                              |
| V2MM_88785  | NM_175495      | Gpr150     | G protein-coupled receptor 150                                              |
| V2MM_111612 | NM_029536      | Gpr165     | G protein-coupled receptor 165                                              |
| V2MM_19732  | NM_026582      | Gpr177     | G protein-coupled receptor 177                                              |
| V2MM_77719  | NM_177383      | Gpr21      | G protein-coupled receptor 21                                               |
| V2MM_29470  | NM_175668      | Gpr4       | G protein-coupled receptor 4                                                |
| V2MM_232544 | NM_001033290   | Gpr55      | G protein-coupled receptor 55                                               |
| V2MM_26151  | NM_030720      | Gpr84      | G protein-coupled receptor 84                                               |
| V2MM_5678   | NM_145066      | Gpr85      | G protein-coupled receptor 85                                               |
| V2MM_79534  | NM_029460      | Gprc2a-rs5 | G protein-coupled receptor, family C, group 2, member A, related sequence 5 |
| V2MM_18378  | NM_153071      | Gprc6a     | G protein-coupled receptor, family C, group 6, member A                     |
| V2MM_116553 | NM_183209.2    | Gprin2     | G protein regulated inducer of neurite outgrowth 2                          |
| V2MM_4286   | NM_030677      | Gpx2       | glutathione peroxidase 2                                                    |
| V2MM_202761 | NM_001033498   | Gramd2     | GRAM domain containing 2                                                    |
| V2MM_211460 | NM_001013756   | Grhl3      | transcription factor CP2-like 4                                             |
| V2MM_239513 | NM_001013756   | Grhl3      | transcription factor CP2-like 4                                             |
| V2MM_195601 | NM_175481      | Grik4      | glutamate receptor KA1                                                      |
| V2MM_60526  | NM_173372      | Grm6       | glutamate receptor, metabotropic 6                                          |
| V2MM_33613  | NM_146066      | Gspt1      | G1 to S phase transition 1                                                  |

|             |                |           |                                                                                                   |
|-------------|----------------|-----------|---------------------------------------------------------------------------------------------------|
| V2MM_66965  | NM_010363      | Gstz1     | glutathione transferase zeta 1 (maleylacetoacetate isomerase)                                     |
| V2MM_45544  | NM_025294      | Gtlf3b    | transcript expressed during hematopoiesis 2                                                       |
| V2MM_93554  | NM_181424      | Gtpbp5    | GTP binding protein 5                                                                             |
| V2MM_27749  | NM_145067      | Gucy2c    | guanylate cyclase 2c                                                                              |
| V2MM_56377  | NM_029000      | Gvin1     | very large inducible GTPase 1                                                                     |
| V2MM_66195  | NM_013755      | Gyg       | glycogenin 1                                                                                      |
| V2MM_59464  | NM_010293      | Gykl1     | glycerol kinase-like 1                                                                            |
| V2MM_118555 | NM_177923.1    | H2-M10.2  | histocompatibility 2, M region locus 10.2                                                         |
| V2MM_68607  | NM_010395      | H2-T10    | histocompatibility 2, T region locus 10                                                           |
| V2MM_89886  | NM_177688      | H2afj     | H2A histone family, member J                                                                      |
| V2MM_29407  | NM_146101      | Habp2     | hyaluronic acid binding protein 2                                                                 |
| V2MM_225488 | NM_175000      | Hbq1      | hemoglobin, theta 1                                                                               |
| V2MM_87014  | NM_175000      | Hbq1      | hemoglobin, theta 1                                                                               |
| V2MM_226854 | NM_181821      | Hcfc1r1   | host cell factor C1 regulator 1                                                                   |
| V2MM_77685  | NM_010408      | Hcn1      | hyperpolarization-activated, cyclic nucleotide-gated K+ 1                                         |
| V2MM_262551 | NM_198962      | Hcrtr2    | hypocretin (orexin) receptor 2                                                                    |
| V2MM_173310 | NM_001001883.3 | Hecw2     | HECT, C2 and WW domain containing E3 ubiquitin protein ligase 2                                   |
| V2MM_107641 | NM_001081107   | Hel308    | helicase, mus308-like                                                                             |
| V2MM_86856  | NM_173789      | Helt      | Hey-like transcription factor                                                                     |
| V2MM_100123 | NM_198298      | Helz      | helicase with zinc finger domain                                                                  |
| V2MM_78571  | NM_028705      | Herc3     | hect domain and RLD 3                                                                             |
| V2MM_50904  | NM_033041      | Hes7      | hairy and enhancer of split 7                                                                     |
| V2MM_193858 | NM_175663      | Hist1h2ba | histone 1, H2ba                                                                                   |
| V2MM_192162 | NM_144959      | Hltf      | SWI/SNF related, matrix associated, actin dependent regulator of chromatin, subfamily a, member 3 |
| V2MM_86568  | NM_173731      | Hmgcll1   | 3-hydroxymethyl-3-methylglutaryl-Coenzyme A lyase-like 1                                          |
| V2MM_24354  | NM_027521      | Hmha1     | minor histocompatibility antigen HA-1                                                             |
| V2MM_193957 | NM_133834      | Hnrpf     | heterogeneous nuclear ribonucleoprotein F                                                         |
| V2MM_25705  | NM_144802      | Hnrpll    | heterogeneous nuclear ribonucleoprotein L-like                                                    |
| V2MM_23637  | NM_175606      | Hod       | homeobox only domain                                                                              |
| V2MM_224489 | NM_001005247   | Hps5      | Hermansky-Pudlak syndrome 5                                                                       |
| V2MM_82796  | NM_010472      | Hrb       | HIV-1 Rev binding protein                                                                         |
| V2MM_49394  | NM_013559      | Hsp110    | heat shock protein 105                                                                            |
| V2MM_96159  | NM_010478      | Hspa1b    | heat shock 70kDa protein 1B                                                                       |
| V2MM_51929  | NM_013558      | Hspa1l    | heat shock 70kDa protein 1-like                                                                   |
| V2MM_87228  | NM_175111      | Hspbap1   | Hspb associated protein 1                                                                         |

|             |              |          |                                                                      |
|-------------|--------------|----------|----------------------------------------------------------------------|
| V2MM_53977  | NM_016865    | Htati2   | HIV-1 tat interactive protein 2, homolog                             |
| V2MM_91122  | NM_178020    | Hyal3    | hyaluronidase 3                                                      |
| V2MM_21264  | NM_146042    | Ibrdc2   | IBR domain containing 2                                              |
| V2MM_44895  | NM_177197    | Idi2     | isopentenyl diphosphate delta-isomerase type 2                       |
| V2MM_261891 | NM_172648    | Ifi205   | interferon activated gene 205                                        |
| V2MM_226962 | NM_011879    | Ik       | IK cytokine                                                          |
| V2MM_81660  | NM_010551    | Il16     | interleukin 16                                                       |
| V2MM_60090  | NM_153511    | Il1f9    | interleukin 1 family, member 9                                       |
| V2MM_91422  | NM_178258    | Il22ra2  | interleukin 22 receptor, alpha 2                                     |
| V2MM_206443 | NM_029594.1  | Il31     | interleukin 31                                                       |
| V2MM_171535 | NM_009909    | Il8rb    | interleukin 8 receptor, beta                                         |
| V2MM_66480  | NM_029673    | Immt     | inner membrane protein, mitochondrial                                |
| V2MM_196613 | NM_177730    | Impad1   | inositol monophosphatase domain containing 1                         |
| V2MM_21316  | NM_174876    | Impg2    | interphotoreceptor matrix proteoglycan 2                             |
| V2MM_27296  | NM_145540    | Ints3    | integrator complex subunit 3                                         |
| V2MM_91257  | NM_178112    | Ints8    | integrator complex subunit 8                                         |
| V2MM_95538  | NM_198026    | Iqcc     | IQ motif containing C                                                |
| V2MM_110736 | NM_030068.1  | Iqch     | IQ motif containing H                                                |
| V2MM_110740 | NM_030068.1  | Iqch     | IQ motif containing H                                                |
| V2MM_41444  | NM_172535    | Iqub     | IQ motif and ubiquitin domain containing                             |
| V2MM_33107  | NM_022986    | Irak1bp1 | interleukin-1 receptor-associated kinase 1 binding protein 1         |
| V2MM_92694  | NM_178757    | Irf2bp1  | interferon regulatory factor 2 binding protein 1                     |
| V2MM_71354  | NM_010572    | Irs4     | insulin receptor substrate 4                                         |
| V2MM_191930 | NM_001081053 | Itga10   | integrin, alpha 10                                                   |
| V2MM_133278 | NM_010576    | Itga4    | integrin alpha 4                                                     |
| V2MM_21191  | NM_010578.2  | Itgb1    | integrin beta 1 (fibronectin receptor beta) (Itgb1), mRNA            |
| V2MM_200115 | NM_177290    | Itgb8    | integrin beta 8                                                      |
| V2MM_5397   | NM_008410    | Itm2b    | integral membrane protein 2B                                         |
| V2MM_55386  | NM_001081175 | Itpkb    | inositol 1,4,5-trisphosphate 3-kinase B                              |
| V2MM_66426  | NM_011365    | Itn2     | intersectin 2                                                        |
| V2MM_21446  | NM_152895    | Jarid1b  | PLU1                                                                 |
| V2MM_72017  | NM_173433    | Jmjd2d   | jumonji domain containing 2D                                         |
| V2MM_51021  | NM_145958    | Kbtbd2   | kelch repeat and BTB (POZ) domain containing 2                       |
| V2MM_116929 | NM_001024135 | Kbtbd7   | kelch repeat and BTB (POZ) domain containing 7-like protein          |
| V2MM_85201  | NM_133207    | Kcnh7    | potassium voltage-gated channel, subfamily H (eag-related), member 7 |



|             |                |          |                                                                 |
|-------------|----------------|----------|-----------------------------------------------------------------|
| V2MM_31929  | NM_030716      | Kcnp2    | Kv channel-interacting protein 2                                |
| V2MM_20642  | NM_019659      | Kcnj1    | potassium inwardly-rectifying channel, subfamily J, member 1    |
| V2MM_30221  | NM_080465      | Kcnn2    | small conductance calcium-activated potassium channel protein 2 |
| V2MM_94919  | NM_183285      | Kctd2    | potassium channel tetramerisation domain containing 2           |
| V2MM_197039 | NM_175519      | Kctd8    | potassium channel tetramerisation domain containing 8           |
| V2MM_200678 | NM_145997.2    | Kdm5a    | lysine (K                                                       |
| V2MM_173589 | NM_001033039   | Klhc9    | kelch domain containing 9                                       |
| V2MM_133950 | NM_198305.2    | Klhl17   | kelch-like 17 (Drosophila) (Klhl17), mRNA                       |
| V2MM_193323 | NM_178771      | Klhl26   | kelch-like 26                                                   |
| V2MM_43722  | NM_172925      | Klhl31   | kelch repeat and BTB (POZ) domain containing 1                  |
| V2MM_60930  | NM_172925      | Klhl31   | kelch repeat and BTB (POZ) domain containing 1                  |
| V2MM_87462  | NM_175174      | Klhl5    | kelch-like 5 (Drosophila)                                       |
| V2MM_227139 | NM_183390      | Klhl6    | kelch-like 6                                                    |
| V2MM_49893  | NM_153590      | Klre1    | killer cell lectin-like receptor family E member 1              |
| V2MM_59719  | NM_033078      | Klrk1    | NKG2-D                                                          |
| V2MM_32988  | NM_133809      | Kmo      | kynurenine 3-monooxygenase                                      |
| V2MM_262137 | NM_027983      | Krt33a   | RIKEN cDNA 2310015J09                                           |
| V2MM_6785   | NM_008476      | Krt6a    | keratin complex 2, basic, gene 6a                               |
| V2MM_81148  | NM_212485.2    | Krt73    | keratin 73                                                      |
| V2MM_188096 | NM_008474      | Krt84    | keratin complex 2, basic, gene 16                               |
| V2MM_63597  | NM_010676      | Krtap8-2 | keratin associated protein 8-2                                  |
| V2MM_62695  | NM_029571      | Kti12    | KTI12 homolog, chromatin associated                             |
| V2MM_61067  | NM_145993      | L3mbtl2  | l(3)mbt-like 2                                                  |
| V2MM_61464  | NM_172787      | L3mbtl3  | l(3)mbt-like 3                                                  |
| V2MM_71241  | NM_026235      | Larp6    | La ribonucleoprotein domain family, member 6                    |
| V2MM_128403 | NM_001164201.1 | Lass3    | LAG1 homolog, ceramide synthase 3                               |
| V2MM_22435  | NM_015771      | Lats2    | large tumor suppressor 2                                        |
| V2MM_133588 | NM_001018079   | Lce3f    | late cornified envelope protein                                 |
| V2MM_238980 | NM_177846.3    | Lcmt2    | leucine carboxyl methyltransferase 2                            |
| V2MM_226991 | NM_178142      | Lcorl    | Mblk1-related protein-1                                         |
| V2MM_91295  | NM_178142      | Lcorl    | Mblk1-related protein-1                                         |
| V2MM_125510 | NM_001033979   | Ldlrad2  | low density lipoprotein receptor A domain containing 2          |
| V2MM_32728  | NM_019782      | Lepre1   | leprecan 1                                                      |
| V2MM_82862  | NM_010709      | Lgtn     | ligatin                                                         |
| V2MM_88357  | NM_175386      | Lhfp     | lipoma HMGIC fusion partner                                     |

|             |                |              |                                                           |
|-------------|----------------|--------------|-----------------------------------------------------------|
| V2MM_56503  | NM_172589      | Lhfp12       | lipoma HMGIC fusion partner-like 2                        |
| V2MM_196203 | NM_177763      | Lhfp14       | lipoma HMGIC fusion partner-like 4                        |
| V2MM_195610 | NM_010713      | Lhx8         | LIM homeobox protein 8                                    |
| V2MM_33350  | NM_008501      | Lif          | leukemia inhibitory factor                                |
| V2MM_62706  | NM_176953      | Lig4         | DNA ligase IV                                             |
| V2MM_21583  | NM_008505      | Lmo2         | LIM domain only 2                                         |
| V2MM_66740  | NM_172827      | Lnpep        | leucyl/cystinyl aminopeptidase                            |
| V2MM_53008  | NM_080795      | Lnx2         | PDZ domain containing ring finger 1                       |
| V2MM_171980 | XM_003085101.1 | LOC100502943 | hypothetical protein<br>LOC100502943                      |
| V2MM_232809 | XM_003085405.1 | LOC100502966 | zinc finger protein 717-like                              |
| V2MM_101808 | XR_105638.1    | LOC100502987 | hypothetical LOC100502987                                 |
| V2MM_227263 | XR_105430.1    | LOC100503029 | hypothetical LOC100503029                                 |
| V2MM_199654 | XR_105064.1    | LOC100503149 | hypothetical LOC100503149                                 |
| V2MM_207836 | XM_003084935.1 | LOC100503368 | zinc finger protein 120-like                              |
| V2MM_237984 | XM_003084865.1 | LOC100503388 | hypothetical protein<br>LOC100503388                      |
| V2MM_213462 | XR_105977.1    | LOC100503392 | hypothetical LOC100503392,<br>transcript variant 1        |
| V2MM_96817  | XM_003085408.1 | LOC100503535 | uncharacterized protein C17orf47<br>homolog               |
| V2MM_170912 | XR_105541.1    | LOC100503592 | hypothetical LOC100503592                                 |
| V2MM_173593 | XR_104609.1    | LOC100503962 | hypothetical LOC100503962,<br>transcript variant 1        |
| V2MM_199540 | XR_105588.1    | LOC100504675 | hypothetical LOC100504675                                 |
| V2MM_223224 | XM_003086824.1 | LOC100505216 | hypothetical protein<br>LOC100505216                      |
| V2MM_45829  | XM_003085053.1 | LOC100505348 | hypothetical protein<br>LOC100505348                      |
| V2MM_162397 | XM_001477076.2 | LOC675594    | hypothetical LOC675594                                    |
| V2MM_25849  | NM_080420      | Lpo          | lactoperoxidase                                           |
| V2MM_33332  | NM_001025067   | Lrig2        | leucine-rich repeats and<br>immunoglobulin-like domains 2 |
| V2MM_61366  | NM_177152      | Lrig3        | leucine-rich and immunoglobulin-<br>like domains 3        |
| V2MM_20816  | NM_022993      | Lrp10        | low-density lipoprotein receptor-<br>related protein 10   |
| V2MM_75173  | NM_026278      | Lrp2bp       | LRP2 binding protein                                      |
| V2MM_38908  | NM_146242      | Lrrc10       | leucine rich repeat containing 10                         |
| V2MM_224614 | NM_175413      | Lrrc39       | leucine rich repeat containing 39                         |
| V2MM_226906 | NM_175413      | Lrrc39       | leucine rich repeat containing 39                         |
| V2MM_84988  | NM_029985      | Lrrc42       | leucine rich repeat containing 42                         |
| V2MM_83824  | NM_025657      | Lrrc57       | leucine rich repeat containing 57                         |
| V2MM_160031 | NM_177093      | Lrrc58       | leucine rich repeat containing 58                         |
| V2MM_55961  | NM_177093      | Lrrc58       | leucine rich repeat containing 58                         |
| V2MM_113976 | NM_001163559.1 | Lrrig1       | leucine-rich repeats and IQ motif<br>containing 1         |

|             |           |         |                                                                              |
|-------------|-----------|---------|------------------------------------------------------------------------------|
| V2MM_82875  | NM_010733 | Lrrn3   | leucine rich repeat protein 3, neuronal                                      |
| V2MM_28420  | NM_172492 | Lrtm2   | leucine-rich repeats and transmembrane domains 2                             |
| V2MM_46805  | NM_138721 | Lsm10   | U7 snRNP-specific Sm-like protein LSM10                                      |
| V2MM_86536  | NM_172947 | Lsm12   | LSM12 homolog                                                                |
| V2MM_31700  | NM_008519 | Ltb4r1  | leukotriene B4 receptor 1                                                    |
| V2MM_29006  | NM_008520 | Ltbp3   | latent transforming growth factor beta binding protein 3                     |
| V2MM_190009 | NM_201358 | Lym4    | cDNA sequence BC034664                                                       |
| V2MM_54668  | NM_013590 | Lyz     | P lysozyme structural                                                        |
| V2MM_150584 | NM_175296 | Mael    | maelstrom homolog                                                            |
| V2MM_197099 | NM_173783 | Mageb18 | melanoma antigen family B, 18                                                |
| V2MM_34177  | NM_133853 | Magi3   | membrane-associated guanylate kinase-related (MAGI-3)                        |
| V2MM_25789  | NM_008549 | Man2a1  | mannosidase 2, alpha 1                                                       |
| V2MM_71202  | NM_173740 | Maoa    | monoamine oxidase A                                                          |
| V2MM_32740  | NM_024275 | Map4k5  | mitogen-activated protein kinase kinase kinase 5                             |
| V2MM_175624 | NM_009158 | Mapk10  | mitogen activated protein kinase 10                                          |
| V2MM_206388 | NM_177345 | Mapkap1 | mitogen-activated protein kinase associated protein 1                        |
| V2MM_188698 | NM_133350 | Mapre3  | APC-binding protein EB2                                                      |
| V2MM_188867 | NM_133350 | Mapre3  | APC-binding protein EB2                                                      |
| V2MM_48961  | NM_172606 | March6  | membrane-associated ring finger (C3HC4) 6                                    |
| V2MM_33052  | NM_145569 | Mat2a   | methionine adenosyltransferase II, alpha                                     |
| V2MM_42558  | NM_153546 | Mboat1  | O-acyltransferase (membrane bound) domain containing 1                       |
| V2MM_6614   | NM_145130 | Mboat5  | O-acyltransferase (membrane bound) domain containing 5                       |
| V2MM_10742  | NM_010777 | Mbp     | myelin basic protein                                                         |
| V2MM_195522 | NM_027290 | Mcm10   | minichromosome maintenance complex component 10                              |
| V2MM_21840  | NM_008566 | Mcm5    | minichromosome maintenance deficient 5, cell division cycle 46               |
| V2MM_40210  | NM_026902 | Mcts1   | malignant T cell amplified sequence 1                                        |
| V2MM_51671  | NM_021442 | Mds1    | myelodysplasia syndrome 1 protein homolog                                    |
| V2MM_225213 | NM_178881 | Med12l  | mediator of RNA polymerase II transcription, subunit 12 homolog (yeast)-like |
| V2MM_10552  | NM_025895 | Med28   | endothelial-derived gene 1                                                   |
| V2MM_26861  | NM_008585 | Mep1a   | meprin 1 alpha                                                               |
| V2MM_21091  | NM_030705 | Mesdc1  | mesoderm development candidate 1                                             |

|             |              |          |                                                                  |
|-------------|--------------|----------|------------------------------------------------------------------|
| V2MM_82377  | NM_008588    | Mesp1    | mesoderm posterior 1                                             |
| V2MM_82379  | NM_008588    | Mesp1    | mesoderm posterior 1                                             |
| V2MM_32025  | NM_008590    | Mest     | mesoderm specific transcript                                     |
| V2MM_14656  | NM_175224    | Metap1   | methionyl aminopeptidase 1                                       |
| V2MM_32883  | NM_019721    | Mettl3   | methyltransferase-like 3                                         |
| V2MM_81228  | NM_176917    | Mettl4   | methyltransferase like 4                                         |
| V2MM_34957  | NM_028140    | Mfsd8    | major facilitator superfamily domain containing 8                |
| V2MM_86903  | NM_173870    | Mgat4a   | mannoside acetylglucosaminyltransferase 4, isoenzyme A           |
| V2MM_60610  | NM_153598    | MGC37823 | UDP glucuronosyltransferase 2 family, polypeptide B34            |
| V2MM_36191  | NM_146034    | Mgea6    | CTAGE family, member 5                                           |
| V2MM_42381  | NM_019946    | Mgst1    | microsomal glutathione S-transferase 1                           |
| V2MM_73602  | NM_025569    | Mgst3    | microsomal glutathione S-transferase 3                           |
| V2MM_67358  | NM_013791    | Mkln1    | muskelin 1, intracellular mediator containing kelch motifs       |
| V2MM_89430  | NM_177595    | Mkx      | mohawk                                                           |
| V2MM_73840  | NM_053015    | Mlph     | melanophilin                                                     |
| V2MM_92899  | NM_178797    | Mlstd1   | male sterility domain containing 1                               |
| V2MM_30068  | NM_133823    | Mmaa     | methylmalonic aciduria type A                                    |
| V2MM_52437  | NM_013599    | Mmp9     | matrix metalloproteinase 9                                       |
| V2MM_16702  | NM_153127    | Mmrn2    | elastin microfibril interfacier 3                                |
| V2MM_197791 | NM_029797    | Mnd1     | GAJ protein                                                      |
| V2MM_25392  | NM_008613    | Mns1     | meiosis-specific nuclear structural protein 1                    |
| V2MM_103138 | NM_026779    | Mocos    | molybdenum cofactor sulfurase                                    |
| V2MM_95693  | NM_198162    | Morc2a   | microrchidia 2A                                                  |
| V2MM_102441 | NM_001045529 | Morc3    | microrchidia 3                                                   |
| V2MM_107830 | NM_029112    | Morn3    | MORN repeat containing 3                                         |
| V2MM_63266  | NM_021509    | Moxd1    | monooxygenase, DBH-like 1                                        |
| V2MM_18383  | NM_010824    | Mpo      | myeloperoxidase                                                  |
| V2MM_29303  | NM_019939    | Mpp6     | membrane protein, palmitoylated 3 (MAGUK p55 subfamily member 6) |
| V2MM_77696  | NM_176993    | Mpzl3    | yelin protein zero-like 3 (Mpzl3)                                |
| V2MM_33687  | NM_008627    | Mrg2     | myeloid ecotropic viral integration site-related gene 2          |
| V2MM_22914  | NM_030726    | Mrgprh   | MAS-related GPR, member H                                        |
| V2MM_83777  | NM_025300    | Mrpl15   | mitochondrial ribosomal protein L15                              |
| V2MM_84089  | NM_026851    | Mrpl52   | mitochondrial ribosomal protein L52                              |
| V2MM_11408  | NM_026768    | Mrps18a  | mitochondrial ribosomal protein S18A                             |
| V2MM_3025   | NM_026768    | Mrps18a  | mitochondrial ribosomal protein S18A                             |

|             |                |         |                                                                       |
|-------------|----------------|---------|-----------------------------------------------------------------------|
| V2MM_35760  | NM_024174      | Mrps23  | mitochondrial ribosomal protein S23                                   |
| V2MM_55964  | NM_013516      | Ms4a2   | membrane-spanning 4-domains, subfamily A, member 2                    |
| V2MM_50626  | NM_028595      | Ms4a6c  | membrane-spanning 4-domains, subfamily A, member 6C                   |
| V2MM_2021   | NM_054082      | Mta3    | metastasis associated 3                                               |
| V2MM_34547  | NM_008633      | Mtap4   | microtubule-associated protein 4                                      |
| V2MM_42122  | NM_177293      | Mtap7d3 | MAP7 domain containing 3                                              |
| V2MM_19076  | NM_172135      | Mterf   | mitochondrial transcription termination factor                        |
| V2MM_49749  | NM_172761      | Mthfsd  | methenyltetrahydrofolate synthetase domain containing                 |
| V2MM_196343 | NM_001005863   | Mtus1   | mitochondrial tumor suppressor 1                                      |
| V2MM_86544  | NM_172979      | Muc15   | mucin 15                                                              |
| V2MM_93715  | NM_181729      | Muc6    | mucin 6, gastric                                                      |
| V2MM_152310 | NM_001012323.1 | Mup20   | major urinary protein 20                                              |
| V2MM_36673  | NM_008648      | Mup4    | major urinary protein 4                                               |
| V2MM_224665 | NM_181390      | Mustn1  | musculoskeletal, embryonic nuclear protein 1                          |
| V2MM_30876  | NM_008506      | Mycl1   | lung carcinoma myc related oncogene 1                                 |
| V2MM_23343  | NM_008709      | Mycn    | neuroblastoma myc-related oncogene 1                                  |
| V2MM_227613 | NM_022410      | Myh9    | myosin, heavy polypeptide 9, non-muscle                               |
| V2MM_76260  | NM_022410      | Myh9    | myosin, heavy polypeptide 9, non-muscle                               |
| V2MM_196295 | NM_001081219   | Myo1a   | myosin IA                                                             |
| V2MM_89553  | NM_177619      | Myst2   | MYST histone acetyltransferase 2                                      |
| V2MM_43599  | NM_017479      | Myst4   | MYST histone acetyltransferase monocytic leukemia 4                   |
| V2MM_108014 | NM_201369.3    | N4bp2l2 | NEDD4 binding protein 2-like 2                                        |
| V2MM_33276  | NM_008667      | Nab1    | Ngfi-A binding protein 1                                              |
| V2MM_30008  | NM_008668      | Nab2    | Ngfi-A binding protein 2                                              |
| V2MM_18485  | NM_026425      | Nat5    | N-acetyltransferase 5 (ARD1 homolog, <i>S. cerevisiae</i> )           |
| V2MM_109029 | NM_001111016.1 | Nav2    | neuron navigator 2                                                    |
| V2MM_81818  | NM_026245      | Nbeal1  | neurobeachin like 1                                                   |
| V2MM_29283  | NM_146171      | Ncapd2  | chromosome condensation-related SMC-associated protein 1              |
| V2MM_17609  | NM_010878      | Nck1    | non-catalytic region of tyrosine kinase adaptor protein 1             |
| V2MM_44347  | NM_153505      | Nckap1l | hematopoietic protein 1                                               |
| V2MM_85334  | NM_134009      | Ncln    | nicalin homolog                                                       |
| V2MM_6921   | NM_027175      | Ndufaf1 | NADH dehydrogenase (ubiquinone) 1 alpha subcomplex, assembly factor 1 |

|             |                |         |                                                              |
|-------------|----------------|---------|--------------------------------------------------------------|
| V2MM_24397  | NM_145518      | Ndufs1  | NADH dehydrogenase (ubiquinone) Fe-S protein 1               |
| V2MM_36953  | NM_144946      | Neto1   | neuropilin- and tolloid-like protein 1                       |
| V2MM_110252 | NM_001081324   | Neto2   | neuropilin- and tolloid-like protein 2                       |
| V2MM_86766  | NM_173772      | Neu4    | sialidase 4                                                  |
| V2MM_61491  | NM_009718      | Neurog2 | neurogenin 2                                                 |
| V2MM_28202  | NM_008686      | Nfe2l1  | nuclear factor, erythroid derived 2,-like 1                  |
| V2MM_33336  | NM_008686      | Nfe2l1  | nuclear factor, erythroid derived 2,-like 1                  |
| V2MM_90079  | NM_008687      | Nfib    | nuclear factor I/B                                           |
| V2MM_37226  | NM_008689      | Nfkb1   | nuclear factor kappa-B, subunit 1                            |
| V2MM_49586  | NM_172766      | Nfrkb   | nuclear factor related to kappa B binding protein            |
| V2MM_57447  | NM_009750      | Ngfrap1 | nerve growth factor receptor (TNFRSF16) associated protein 1 |
| V2MM_197730 | NM_175340      | Nhlrc1  | malin                                                        |
| V2MM_58066  | NM_025391      | Nip7    | Saccharomyces cerevisiae Nip7p homolog                       |
| V2MM_50768  | NM_153578      | Nipa1   | non-imprinted in Prader-Willi/Angelman syndrome 1            |
| V2MM_203002 | NM_027116.1    | Nkpd1   | NTPase, KAP family P-loop domain containing 1                |
| V2MM_204349 | NM_008699      | Nkx2-3  | NK2 transcription factor related, locus 3                    |
| V2MM_34842  | NM_133702      | Nol11   | nucleolar protein 11                                         |
| V2MM_30440  | NM_008720      | Npc1    | Niemann Pick type C1                                         |
| V2MM_72546  | NM_033525      | Npnt    | nephronectin                                                 |
| V2MM_21619  | NM_008730      | Nptx1   | neuronal pentraxin 1                                         |
| V2MM_3368   | NM_145354      | Nsun2   | NOL1/NOP2/Sun domain family 2                                |
| V2MM_41068  | NM_011851      | Nt5e    | 5'nucleotidase, ecto                                         |
| V2MM_50207  | NM_025399      | Nudt14  | nudix (nucleoside diphosphate linked moiety X)-type motif 14 |
| V2MM_42706  | NM_172527      | Nudt15  | MTH2 protein                                                 |
| V2MM_227090 | NM_001024205   | Nufip2  | 82-kD FMRP Interacting Protein                               |
| V2MM_96631  | NM_001024205   | Nufip2  | 82-kD FMRP Interacting Protein                               |
| V2MM_96633  | NM_001024205   | Nufip2  | 82-kD FMRP Interacting Protein                               |
| V2MM_195614 | NM_029937.1    | Nup210l | nucleoporin 210-like                                         |
| V2MM_98110  | NM_029937.1    | Nup210l | nucleoporin 210-like                                         |
| V2MM_5270   | NM_027191      | Nup37   | nucleoporin 37                                               |
| V2MM_104046 | NM_183392      | Nup54   | nucleoporin 54                                               |
| V2MM_60844  | NM_172521      | Nut     | nuclear protein in testis                                    |
| V2MM_46816  | NM_016813      | Nxf1    | nuclear RNA export factor 1                                  |
| V2MM_196608 | NM_130888      | Nxf7    | nuclear RNA export factor 7                                  |
| V2MM_94965  | NM_183297      | Nxph4   | neurexophilin 4                                              |
| V2MM_165757 | NM_001113213.1 | Odf2    | outer dense fiber of sperm tails 2                           |
| V2MM_27764  | NM_011857      | Odz3    | odd Oz/ten-m homolog 3                                       |
| V2MM_34226  | NM_011858      | Odz4    | odd Oz/ten-m homolog 4                                       |
| V2MM_34075  | NM_031373      | Ogfr    | opioid growth factor receptor                                |

|             |                |             |                                        |
|-------------|----------------|-------------|----------------------------------------|
| V2MM 25490  | NM 008760      | Ogn         | osteoglycin                            |
| V2MM 39080  | NM 133859      | Olfml3      | olfactomedin-like 3                    |
| V2MM 120640 | NM 001011758   | Olfr1016    | olfactory receptor 1016                |
| V2MM 52351  | NM 146586      | Olfr1018    | olfactory receptor 1018                |
| V2MM 57505  | NM 146586      | Olfr1018    | olfactory receptor 1018                |
| V2MM 57680  | NM 146580      | Olfr1020    | olfactory receptor 1020                |
| V2MM 51148  | NM 147010      | Olfr1052    | olfactory receptor 1052                |
| V2MM 53019  | NM 147018      | Olfr1056    | olfactory receptor 1056                |
| V2MM 49356  | NM 147020      | Olfr1061    | olfactory receptor 1061                |
| V2MM 225978 | NM 146511      | Olfr107     | olfactory receptor 107                 |
| V2MM 85775  | NM 146465      | Olfr108     | olfactory receptor 108                 |
| V2MM 74443  | NM 146846      | Olfr1087    | olfactory receptor 1087                |
| V2MM 72595  | NM 146768      | Olfr1099    | olfactory receptor 1099                |
| V2MM 49854  | NM 146591      | Olfr1101    | olfactory receptor 1101                |
| V2MM 51341  | NM 146591      | Olfr1101    | olfactory receptor 1101                |
| V2MM 61752  | NM 146769      | Olfr1110    | olfactory receptor 1110                |
| V2MM 51156  | NM 147028      | Olfr1125    | olfactory receptor 1125                |
| V2MM 227039 | NM 146642      | Olfr1140    | olfactory receptor 1140                |
| V2MM 76698  | NM 146848      | Olfr1161    | olfactory receptor 1161                |
| V2MM 23571  | NM 146294      | Olfr1167    | olfactory receptor 1167                |
| V2MM 212924 | XM 621554.5    | Olfr1174-ps | olfactory receptor 1174,<br>pseudogene |
| V2MM 57840  | NM 146323      | Olfr1232    | olfactory receptor 1232                |
| V2MM 59378  | NM 147090      | Olfr1253    | olfactory receptor 1253                |
| V2MM 43676  | NM 146342      | Olfr1269    | olfactory receptor 1269                |
| V2MM 53834  | NM 146377      | Olfr127     | olfactory receptor 127                 |
| V2MM 74166  | NM 146908      | Olfr1280    | olfactory receptor 1280                |
| V2MM 76080  | NM 146889      | Olfr1302    | olfactory receptor 1302                |
| V2MM 85720  | NM 146450      | Olfr1314    | olfactory receptor 1314                |
| V2MM 121608 | NM 207631      | Olfr1321    | olfactory receptor 1321                |
| V2MM 30260  | NM 146292      | Olfr1324    | olfactory receptor 1324                |
| V2MM 86015  | NM 146541      | Olfr1361    | olfactory receptor 1361                |
| V2MM 86017  | NM 146541      | Olfr1361    | olfactory receptor 1361                |
| V2MM 57710  | NM 146337      | Olfr1396    | olfactory receptor 1396                |
| V2MM 56451  | NM 146505      | Olfr148     | olfactory receptor 148                 |
| V2MM 225002 | NM 146635      | Olfr1489    | olfactory receptor 1489                |
| V2MM 86162  | NM 146635      | Olfr1489    | olfactory receptor 1489                |
| V2MM 79991  | NM 146796      | Olfr1499    | olfactory receptor 1499                |
| V2MM 86220  | NM 146646      | Olfr152     | olfactory receptor 152                 |
| V2MM 97735  | NM 019475      | Olfr155     | olfactory receptor 155                 |
| V2MM 86389  | NM 146860      | Olfr161     | olfactory receptor 161                 |
| V2MM 197319 | NM 146466      | Olfr165     | olfactory receptor 165                 |
| V2MM 85778  | NM 146466      | Olfr165     | olfactory receptor 165                 |
| V2MM 49978  | NM 146357      | Olfr168     | olfactory receptor 168                 |
| V2MM 42539  | NM 020598      | Olfr17      | olfactory receptor 17                  |
| V2MM 50809  | NM 146486      | Olfr203     | olfactory receptor 203                 |
| V2MM 52086  | NM 146384      | Olfr208     | olfactory receptor 208                 |
| V2MM 85639  | NM 146429      | Olfr223     | olfactory receptor 223                 |
| V2MM 114255 | XM 001474443.2 | Olfr227     | olfactory receptor 227                 |

|             |                |         |                                                           |
|-------------|----------------|---------|-----------------------------------------------------------|
| V2MM 85538  | NM 146405      | Olfr228 | olfactory receptor 228                                    |
| V2MM 239522 | NM 001011866   | Olfr309 | olfactory receptor 309                                    |
| V2MM 70104  | NM 146939      | Olfr354 | olfactory receptor 354                                    |
| V2MM 69569  | NM 146825      | Olfr39  | olfactory receptor 39                                     |
| V2MM 58884  | NM 147005      | Olfr395 | olfactory receptor 395                                    |
| V2MM 68542  | NM 146715      | Olfr419 | olfactory receptor 419                                    |
| V2MM 47090  | NM 146305      | Olfr420 | olfactory receptor 420                                    |
| V2MM 75020  | NM 146819      | Olfr466 | olfactory receptor 466                                    |
| V2MM 123518 | XM 001487801.2 | Olfr471 | olfactory receptor 471                                    |
| V2MM 57330  | NM 146307      | Olfr498 | olfactory receptor 498                                    |
| V2MM 53651  | NM 146311      | Olfr510 | olfactory receptor 510                                    |
| V2MM 61119  | NM 146325      | Olfr554 | olfactory receptor 554                                    |
| V2MM 56362  | NM 147092      | Olfr561 | olfactory receptor 561                                    |
| V2MM 56413  | NM 147085      | Olfr571 | olfactory receptor 571                                    |
| V2MM 57075  | NM 147053      | Olfr582 | olfactory receptor 582                                    |
| V2MM 55469  | NM 147111      | Olfr586 | olfactory receptor 586                                    |
| V2MM 128590 | NM 207556      | Olfr592 | olfactory receptor 592                                    |
| V2MM 59714  | NM 147046      | Olfr600 | olfactory receptor 600                                    |
| V2MM 56865  | NM 147070      | Olfr604 | olfactory receptor 604                                    |
| V2MM 66239  | NM 146756      | Olfr608 | olfactory receptor 608                                    |
| V2MM 50075  | NM 147047      | Olfr618 | olfactory receptor 618                                    |
| V2MM 41587  | NM 146315      | Olfr62  | olfactory receptor 62                                     |
| V2MM 51700  | NM 147083      | Olfr622 | olfactory receptor 622                                    |
| V2MM 239088 | NM 147098      | Olfr630 | olfactory receptor 630                                    |
| V2MM 53876  | NM 147077      | Olfr643 | olfactory receptor 643                                    |
| V2MM 27628  | NM 146760      | Olfr672 | olfactory receptor 672                                    |
| V2MM 44179  | NM 147069      | Olfr686 | olfactory receptor 686                                    |
| V2MM 47444  | NM 147032      | Olfr705 | olfactory receptor 705                                    |
| V2MM 12330  | NM 054091      | Olfr74  | olfactory receptor 74                                     |
| V2MM 36167  | NM 146298      | Olfr746 | olfactory receptor 746                                    |
| V2MM 54546  | NM 146422      | Olfr765 | olfactory receptor 765                                    |
| V2MM 227551 | NM 146551      | Olfr788 | olfactory receptor 788                                    |
| V2MM 46759  | NM 146548      | Olfr800 | olfactory receptor 800                                    |
| V2MM 86293  | NM 146675      | Olfr820 | olfactory receptor 820                                    |
| V2MM 214283 | NM 001012266   | Olfr835 | olfactory receptor 835                                    |
| V2MM 241917 | NM 001012266   | Olfr835 | olfactory receptor 835                                    |
| V2MM 41149  | NM 146567      | Olfr843 | olfactory receptor 843                                    |
| V2MM 65862  | NM 146903      | Olfr871 | olfactory receptor 871                                    |
| V2MM 195057 | NM 146419      | Olfr883 | olfactory receptor 883                                    |
| V2MM 85607  | NM 146423      | Olfr887 | olfactory receptor 887                                    |
| V2MM 85809  | NM 146478      | Olfr891 | olfactory receptor 891                                    |
| V2MM 71746  | NM 146786      | Olfr914 | olfactory receptor 914                                    |
| V2MM 77737  | NM 146784      | Olfr916 | olfactory receptor 916                                    |
| V2MM 85669  | NM 146438      | Olfr938 | olfactory receptor 938                                    |
| V2MM 197603 | NM 146615      | Olfr986 | olfactory receptor 986                                    |
| V2MM 75654  | NM 146865      | Olfr992 | olfactory receptor 992                                    |
| V2MM 226998 | NM 146437      | Olfr996 | olfactory receptor 996                                    |
| V2MM 53412  | NM 138648      | Olr1    | oxidized low density lipoprotein (lectin-like) receptor 1 |



|             |              |          |                                                                        |
|-------------|--------------|----------|------------------------------------------------------------------------|
| V2MM_234490 | NM_201258    | Oog3     | oogenesis 3                                                            |
| V2MM_95607  | NM_198105    | ORF34    | hypothetical protein LOC207375                                         |
| V2MM_33973  | NM_145525    | Osbpl6   | OSBP-related protein 6                                                 |
| V2MM_38185  | NM_133885    | Osbpl9   | oxysterol binding protein-like 9                                       |
| V2MM_20686  | NM_028091    | Osgpl1   | O-sialoglycoprotein endopeptidase-like 1                               |
| V2MM_54667  | NM_145950    | Osgin2   | oxidative stress induced growth inhibitor family member 2              |
| V2MM_114412 | NM_001013365 | Osm      | oncostatin M                                                           |
| V2MM_23616  | NM_011859    | Osr      | odd-skipped related 1                                                  |
| V2MM_37461  | NM_172416    | Ostm1    | osteopetrosis associated transmembrane protein 1                       |
| V2MM_66697  | NM_027695    | Oxsm     | 3-oxoacyl-ACP synthase, mitochondrial                                  |
| V2MM_59687  | NM_020621    | P2ry4    | purinergic receptor P2Y, G-protein coupled, 4                          |
| V2MM_36905  | NM_008776    | Pafah1b3 | platelet-activating factor acetylhydrolase, isoform 1b, alpha1 subunit |
| V2MM_54896  | NM_013626    | Pam      | peptidylglycine alpha-amidating monooxygenase                          |
| V2MM_35991  | NM_023792    | Pank1    | pantothenate kinase 1 beta                                             |
| V2MM_23880  | NM_011960    | Parg     | poly (ADP-ribose) glycohydrolase                                       |
| V2MM_110605 | NM_029922    | Parp6    | poly (ADP-ribose) polymerase family, member 6                          |
| V2MM_23696  | NM_008780    | Pax1     | paired box gene 1                                                      |
| V2MM_45528  | NM_013627    | Pax6     | paired box gene 6                                                      |
| V2MM_92304  | NM_178685    | Pcdh20   | protocadherin 20                                                       |
| V2MM_28352  | NM_033595    | Pcdhga12 | protocadherin gamma subfamily A, 12                                    |
| V2MM_29764  | NM_027654    | Pcgf6    | polycomb group ring finger 6                                           |
| V2MM_66442  | NM_146239    | Pctk2    | PCTAIRE-motif protein kinase 2                                         |
| V2MM_84084  | NM_026850    | Pdcl3    | phosducin-like 3                                                       |
| V2MM_120552 | NM_001081033 | Pde11a   | phosphodiesterase 11A                                                  |
| V2MM_54442  | NM_016744    | Pde1a    | phosphodiesterase 1A, calmodulin-dependent                             |
| V2MM_109239 | NM_011055    | Pde3b    | phosphodiesterase 3B, cGMP-inhibited                                   |
| V2MM_22185  | NM_001039376 | Pde4dip  | phosphodiesterase 4D interacting protein                               |
| V2MM_53814  | NM_177145    | Pde4dip  | phosphodiesterase 4D interacting protein                               |
| V2MM_47580  | NM_019971    | Pdgfc    | platelet-derived growth factor, C polypeptide                          |
| V2MM_30910  | NM_007952    | Pdia3    | protein disulfide isomerase associated 3                               |
| V2MM_93255  | NM_178939    | Pdrg1    | p53 and DNA damage-regulated protein                                   |
| V2MM_171587 | NM_001081064 | Pdzd2    | PDZ domain containing 2                                                |

|             |              |         |                                                                        |
|-------------|--------------|---------|------------------------------------------------------------------------|
| V2MM_89482  | NM_177605    | Pdzd7   | PDZ domain containing 7                                                |
| V2MM_21511  | NM_001033222 | Pdzd8   | PDZ domain containing 8                                                |
| V2MM_27954  | NM_011868    | Peci    | peroxisomal delta3, delta2-enoyl-Coenzyme A isomerase                  |
| V2MM_74910  | NM_011067    | Per3    | period homolog 3                                                       |
| V2MM_203003 | NM_027777    | Pex1    | peroxin1                                                               |
| V2MM_213095 | NM_171824    | Pgbd5   | piggyBac transposable element derived 5                                |
| V2MM_44079  | NM_028634    | Pgea1   | PKD2 interactor, golgi and endoplasmic reticulum associated 1          |
| V2MM_53544  | NM_021319    | Pglyrp2 | peptidoglycan recognition protein 2                                    |
| V2MM_83844  | NM_025700    | Pgm1    | phosphoglucomutase 1                                                   |
| V2MM_31998  | NM_028352    | Pgm3    | phosphoglucomutase 3                                                   |
| V2MM_33749  | NM_028352    | Pgm3    | phosphoglucomutase 3                                                   |
| V2MM_87073  | NM_175013    | Pgm5    | phosphoglucomutase 5                                                   |
| V2MM_233632 | NM_030101.1  | Pgpep1l | pyroglutamyl-peptidase I-like                                          |
| V2MM_60911  | NM_016783    | Pgrmc1  | progesterone receptor membrane component                               |
| V2MM_99074  | NM_001033257 | Phactr2 | phosphatase and actin regulator 2                                      |
| V2MM_105738 | NM_001007154 | Phactr3 | phosphatase and actin regulator 3                                      |
| V2MM_101762 | NM_172603    | Phf11   | PHD finger protein 11                                                  |
| V2MM_86933  | NM_174852    | Phf12   | PHD zinc finger transcription factor                                   |
| V2MM_25387  | NM_172303    | Phf17   | PHD zinc finger protein Jade1                                          |
| V2MM_197509 | NM_001081409 | Phf20l1 | PHD finger protein 20-like 1                                           |
| V2MM_84338  | NM_027642    | Phf6    | PHD finger protein 6                                                   |
| V2MM_52399  | NM_008832    | Phka1   | phosphorylase kinase alpha 1                                           |
| V2MM_41591  | NM_008838    | Pigf    | phosphatidylinositol glycan, class F                                   |
| V2MM_91302  | NM_178149    | Pik3ip1 | calcineurin-regulated kringle domain protein                           |
| V2MM_21716  | NM_181585    | Pik3r3  | phosphatidylinositol 3 kinase, regulatory subunit, polypeptide 3 (p55) |
| V2MM_56551  | NM_021311    | Piwil1  | piwi like homolog 1                                                    |
| V2MM_22918  | NM_144859    | Pja2    | ring finger protein 131                                                |
| V2MM_53536  | NM_008863    | Pkib    | cAMP-dependent protein kinase inhibitor beta                           |
| V2MM_41206  | NM_139198    | Plac8   | placenta-specific 8                                                    |
| V2MM_22798  | NM_148937    | Plcd4   | phospholipase C, delta 4                                               |
| V2MM_197691 | NM_183191    | Plch1   | phospholipase C-like 3                                                 |
| V2MM_197066 | NM_175556    | Plch2   | phospholipase C, eta 2                                                 |
| V2MM_41433  | NM_177355    | Plcx3   | phosphatidylinositol-specific phospholipase C, X domain containing 3   |
| V2MM_150590 | NM_176916    | Pld5    | phospholipase D family, member 5                                       |
| V2MM_25136  | NM_144920    | Plekha5 | phosphoinositol 3-phosphate-binding protein-2                          |

|             |                |         |                                                                                                                          |
|-------------|----------------|---------|--------------------------------------------------------------------------------------------------------------------------|
| V2MM_88104  | NM_001081333   | Plekhg4 | pleckstrin homology domain containing, family G (with RhoGef domain) member 4                                            |
| V2MM_204092 | NM_001008233.3 | Plekhn1 | pleckstrin homology domain containing, family N member 1                                                                 |
| V2MM_21715  | NM_019755      | Plp2    | proteolipid protein 2                                                                                                    |
| V2MM_22891  | NM_019755      | Plp2    | proteolipid protein 2                                                                                                    |
| V2MM_175996 | NM_175750.3    | Plxna4  | plexin A4                                                                                                                |
| V2MM_2965   | NM_025928      | Pmf1    | polyamine-modulated factor 1                                                                                             |
| V2MM_93625  | NM_181579      | Pof1b   | premature ovarian failure 1B                                                                                             |
| V2MM_87451  | NM_175170      | Pogk    | pogo transposable element with KRAB domain                                                                               |
| V2MM_52093  | NM_172683      | Pogz    | pogo transposable element with ZNF domain                                                                                |
| V2MM_58367  | NM_008892      | Pola1   | polymerase (DNA directed), alpha 1                                                                                       |
| V2MM_195705 | NM_011133      | Pole2   | DNA polymerase epsilon subunit 2                                                                                         |
| V2MM_24417  | NM_011972      | Poli    | polymerase (DNA directed), iota                                                                                          |
| V2MM_14300  | NM_022811      | Polr1e  | RNA polymerase I associated factor 53                                                                                    |
| V2MM_94440  | NM_001081247   | Polr3a  | polymerase (RNA) III (DNA directed) polypeptide A, 155kDa                                                                |
| V2MM_45273  | NM_025298      | Polr3e  | sex-lethal interactor homolog                                                                                            |
| V2MM_55694  | NM_183308      | Pon2    | paraoxonase 2                                                                                                            |
| V2MM_153511 | NM_010127      | Pou6f1  | POU domain, class 6, transcription factor 1                                                                              |
| V2MM_59666  | NM_008903      | Ppap2a  | phosphatidic acid phosphatase 2a                                                                                         |
| V2MM_232637 | NM_001144855.1 | Ppfia4  | protein tyrosine phosphatase, receptor type, f polypeptide (PTPRF), interacting protein (liprin), alpha 4 (Ppfia4), mRNA |
| V2MM_52991  | NM_028677      | Ppih    | peptidylprolyl isomerase H                                                                                               |
| V2MM_226144 | NM_144954      | Ppil2   | peptidylprolyl isomerase-like 2                                                                                          |
| V2MM_85430  | NM_144954      | Ppil2   | peptidylprolyl isomerase-like 2                                                                                          |
| V2MM_99129  | NM_028430.1    | Ppil6   | peptidylprolyl isomerase (cyclophilin)-like 6 (Ppil6), mRNA                                                              |
| V2MM_227508 | NM_028292      | Ppme1   | protein phosphatase methylesterase 1                                                                                     |
| V2MM_58148  | NM_172707      | Ppp1cb  | protein phosphatase 1, catalytic subunit, beta isoform                                                                   |
| V2MM_29286  | NM_146081      | Ppp4r1  | protein phosphatase 4, regulatory subunit 1                                                                              |
| V2MM_51882  | NM_008918      | Ppy     | pancreatic polypeptide                                                                                                   |
| V2MM_33406  | NM_031390      | Pramel3 | preferentially expressed antigen in melanoma-like 3                                                                      |
| V2MM_226978 | NM_178250      | Pramel7 | preferentially expressed antigen in melanoma like 7                                                                      |
| V2MM_2595   | NM_145150      | Prc1    | protein regulator of cytokinesis 1                                                                                       |
| V2MM_84306  | NM_027504      | Prdm16  | transcription factor MEL1                                                                                                |

|             |              |         |                                                                 |
|-------------|--------------|---------|-----------------------------------------------------------------|
| V2MM_12848  | NM_001042671 | Prei4   | preimplantation protein 4                                       |
| V2MM_10271  | NM_054077    | Prelp   | proline arginine-rich end leucine-rich repeat                   |
| V2MM_55800  | NM_021400    | Prg4    | proteoglycan 4                                                  |
| V2MM_59052  | NM_021400    | Prg4    | proteoglycan 4                                                  |
| V2MM_65055  | NM_178143    | Prkaa2  | AMP-activated protein kinase alpha 2 catalytic subunit          |
| V2MM_73087  | NM_011158    | Prkar2b | protein kinase, cAMP dependent regulatory, type II beta         |
| V2MM_85236  | NM_133740    | Prmt3   | protein arginine N-methyltransferase 3                          |
| V2MM_106231 | NM_178891    | Prmt6   | HMT1 hnRNP methyltransferase-like 6                             |
| V2MM_124468 | NM_001044382 | Prok1   | prokineticin 1                                                  |
| V2MM_227337 | NM_175198    | Prox2   | prospero homeobox 2                                             |
| V2MM_83866  | NM_025845    | Prpf38b | PRP38 pre-mRNA processing factor 38 (yeast) domain containing B |
| V2MM_29597  | NM_019628    | Prpmp5  | proline-rich protein MP5                                        |
| V2MM_103193 | NM_001081224 | Prr16   | proline rich 16                                                 |
| V2MM_232072 | NM_022999    | Prrg2   | proline-rich Gla (G-carboxyglutamic acid) polypeptide 2         |
| V2MM_92365  | NM_178695    | Prrg4   | transmembrane gamma-carboxyglutamic acid protein 4              |
| V2MM_2307   | NM_027220    | Prss32  | trypsin 5                                                       |
| V2MM_93391  | NM_181348    | Prune2  | prune homolog 2                                                 |
| V2MM_73941  | NM_011181    | Pscd2   | pleckstrin homology, Sec7 and coiled-coil domains 2             |
| V2MM_227420 | NM_011965    | Psma1   | proteasome (prosome, macropain) subunit, alpha type 1           |
| V2MM_39879  | NM_080554    | Psm5    | proteasome 26S non-ATPase subunit 5                             |
| V2MM_65356  | NM_025550    | Psm6    | proteasome, 26S, non-ATPase regulatory subunit 6                |
| V2MM_50776  | NM_008956    | Ptbp1   | polypyrimidine tract binding protein 1                          |
| V2MM_197506 | NM_139270    | Pthr2   | parathyroid hormone receptor 2                                  |
| V2MM_220895 | NM_025760    | Ptplad2 | protein tyrosine phosphatase-like A domain containing 2         |
| V2MM_78122  | NM_025760    | Ptplad2 | protein tyrosine phosphatase-like A domain containing 2         |
| V2MM_30303  | NM_019933    | Ptpn4   | protein tyrosine phosphatase, non-receptor type 4               |
| V2MM_43817  | NM_177081    | Ptpn7   | protein tyrosine phosphatase, non-receptor type 7               |
| V2MM_56210  | NM_008982    | Ptprj   | protein tyrosine phosphatase, receptor type, J                  |
| V2MM_66385  | NM_011218    | Ptprs   | protein tyrosine phosphatase, receptor type, S                  |

|             |                |         |                                                                 |
|-------------|----------------|---------|-----------------------------------------------------------------|
| V2MM_233330 | NM_001081306   | Ptprz1  | protein tyrosine phosphatase, receptor type Z, polypeptide 1    |
| V2MM_87039  | NM_175004      | Pthr2   | Bcl-2 inhibitor of transcription                                |
| V2MM_55698  | NM_145925      | Pttg1ip | pituitary tumor-transforming gene 1 protein-interacting protein |
| V2MM_60007  | NM_145925      | Pttg1ip | pituitary tumor-transforming gene 1 protein-interacting protein |
| V2MM_36620  | NM_145458      | Pxk     | PX domain containing serine/threonine kinase                    |
| V2MM_231600 | NM_026869      | Pygo2   | pygopus 2                                                       |
| V2MM_70182  | NM_007376      | Pzp     | pregnancy zone protein                                          |
| V2MM_150497 | NM_001159517.1 | Qk      | quaking                                                         |
| V2MM_190600 | NM_029128      | Qtrtd1  | queuine tRNA-ribosyltransferase domain containing 1             |
| V2MM_22598  | NM_023635      | Rab27a  | RAB27A protein                                                  |
| V2MM_86482  | NM_172601      | Rab2b   | RAB2B protein                                                   |
| V2MM_89079  | NM_175562      | Rab39   | RAB39, member RAS oncogene family                               |
| V2MM_87274  | NM_175122      | Rab39b  | RAB39B, member RAS oncogene family                              |
| V2MM_61507  | NM_023852      | Rab3c   | RAB3C, member RAS oncogene family                               |
| V2MM_7052   | NM_144538      | Rab3il1 | RAB3A interacting protein (rabin3)-like 1                       |
| V2MM_37227  | NM_024287      | Rab6    | RAB6A, member RAS oncogene family                               |
| V2MM_74436  | NM_176971      | Rab9b   | RAB9B, member RAS oncogene family                               |
| V2MM_196524 | NM_001103367.1 | Rai2    | retinoic acid induced 2                                         |
| V2MM_208064 | NM_001080925   | Rapgef1 | Rap guanine nucleotide exchange factor (GEF)-like 1             |
| V2MM_72419  | NM_011244      | Rarg    | retinoic acid receptor, gamma                                   |
| V2MM_196995 | NM_181406      | Rars2   | arginyl-tRNA synthetase-like                                    |
| V2MM_93471  | NM_181406      | Rars2   | arginyl-tRNA synthetase-like                                    |
| V2MM_110621 | NM_001033158   | Rasl12  | RAS-like, family 12                                             |
| V2MM_11575  | NM_018750      | Rassf5  | Ras association (RalGDS/AF-6) domain family 5                   |
| V2MM_74101  | NM_009826      | Rb1cc1  | RB1-inducible coiled-coil 1                                     |
| V2MM_227548 | NM_134077      | Rbm26   | RNA binding motif protein 26                                    |
| V2MM_42429  | NM_173376      | Rbmx2   | RNA binding motif protein, X-linked 2                           |
| V2MM_22815  | NM_144814      | Rcor3   | REST corepressor 3                                              |
| V2MM_220764 | NM_021557      | Rdh11   | short-chain dehydrogenase/reductase 1                           |
| V2MM_226378 | NM_175372      | Rdh13   | retinol dehydrogenase 13 (all-trans and 9-cis)                  |
| V2MM_66591  | NM_025654      | Rdm1    | RAD52 motif 1                                                   |
| V2MM_37526  | NM_144865      | Reep2   | receptor expression enhancing protein 2                         |

|             |                |          |                                                      |
|-------------|----------------|----------|------------------------------------------------------|
| V2MM_224981 | NM_178606      | Reep3    | receptor expression enhancing protein 3              |
| V2MM_93261  | NM_180588      | Reep4    | receptor expression enhancing protein 4              |
| V2MM_227516 | NM_181988      | Rerg     | RAS-like, estrogen-regulated, growth-inhibitor       |
| V2MM_227554 | NM_177815      | Rft1     | RFT1 homolog                                         |
| V2MM_104529 | NM_028713      | Rftn2    | raftlin family member 2                              |
| V2MM_239155 | NM_001145660.1 | Rfx8     | regulatory factor X 8                                |
| V2MM_122448 | NM_001040434.1 | Rgag1    | retrotransposon gag domain containing 1              |
| V2MM_224345 | NM_183318      | Rgag4    | retrotransposon gag domain containing 4              |
| V2MM_57054  | NM_019958      | Rgs17    | regulator of G-protein signaling 17                  |
| V2MM_74124  | NM_175092      | Rhof     | ras homolog gene family, member f                    |
| V2MM_47847  | NM_145999      | Rhot2    | ras homolog gene family, member T2                   |
| V2MM_227557 | NM_001025083   | Rhox12   | reproductive homeobox on X chromosome, 12            |
| V2MM_41753  | NM_021300      | Rhox4b   | reproductive homeobox 4B                             |
| V2MM_64832  | NM_025660      | Ribc1    | RIB43A domain with coiled-coils 1                    |
| V2MM_92816  | NM_178780      | Ric3     | resistance to inhibitors of cholinesterase 3 homolog |
| V2MM_197006 | NM_177620      | Rin3     | Ras and Rab interactor 3                             |
| V2MM_224674 | NM_177620      | Rin3     | Ras and Rab interactor 3                             |
| V2MM_94668  | NM_183204      | Rnf182   | ring finger protein 182                              |
| V2MM_213235 | NM_001039242   | Rnf190   | ring finger protein 190                              |
| V2MM_94008  | NM_182999      | Rnf20    | ring finger protein 20                               |
| V2MM_224423 | NM_175549      | Robo2    | roundabout homolog 2                                 |
| V2MM_65206  | NM_011248      | Robo3    | roundabout homolog 3                                 |
| V2MM_33873  | NM_011282      | Ros1     | Ros1 proto-oncogene                                  |
| V2MM_63196  | NM_025589      | Rpl36al  | ribosomal protein L36a-like                          |
| V2MM_224732 | NM_024212      | Rpl4     | ribosomal protein L4                                 |
| V2MM_197792 | NM_175109      | Rps19bp1 | S19 binding protein                                  |
| V2MM_79608  | NM_026147      | Rps20    | ribosomal protein S20                                |
| V2MM_33082  | NM_178775      | Rps6kc1  | ribosomal protein S6 kinase, 52kDa, polypeptide 1    |
| V2MM_72426  | NM_173450      | Rpusd2   | RNA pseudouridylate synthase domain containing 2     |
| V2MM_54493  | NM_017475      | Rragc    | small GTPase homolog                                 |
| V2MM_74533  | NM_026041      | Rrp15    | ribosomal RNA processing 15 homolog                  |
| V2MM_107807 | NM_025438      | Rsrc2    | arginine/serine-rich coiled-coil 2                   |
| V2MM_49468  | NM_130892      | Rtn4ip1  | reticulon 4 interacting protein 1                    |
| V2MM_1231   | NM_153100      | Rtp3     | transmembrane protein 7                              |
| V2MM_36536  | NM_175542      | Rttn     | rotatin                                              |
| V2MM_70199  | NM_009821      | Runx1    | runt related transcription factor 1                  |
| V2MM_50971  | NM_172718      | Rutbc2   | RUN and TBC1 domain containing 2                     |

|             |              |           |                                                                           |
|-------------|--------------|-----------|---------------------------------------------------------------------------|
| V2MM_51886  | NM_172718    | Rutbc2    | RUN and TBC1 domain containing 2                                          |
| V2MM_70555  | NM_025637    | Rwdd3     | RWD domain containing 3                                                   |
| V2MM_262310 | NM_203507    | Rwdd4a    | RWD domain containing 4A                                                  |
| V2MM_215563 | NM_011305    | Rxra      | retinoid X receptor alpha                                                 |
| V2MM_225666 | NM_194357    | Rya3      | antimicrobial peptide RYA3                                                |
| V2MM_95277  | NM_194357    | Rya3      | antimicrobial peptide RYA3                                                |
| V2MM_58315  | NM_020568    | S3-12     | plasma membrane associated protein, S3-12                                 |
| V2MM_38783  | NM_173029    | Sacy      | soluble adenylyl cyclase                                                  |
| V2MM_60899  | NM_016682    | Sae2      | ubiquitin-like 1 (sentrin) activating enzyme E1B                          |
| V2MM_234453 | NM_001029979 | Safb2     | scaffold attachment factor B2                                             |
| V2MM_106257 | NM_028349    | Sass6     | spindle assembly 6                                                        |
| V2MM_111661 | NM_028655.1  | Satl1     | spermidine/spermine N1-acetyl transferase-like 1                          |
| V2MM_54574  | NM_172769    | Sc5d      | sterol-C5-desaturase (fungal ERG3, delta-5-desaturase) homolog            |
| V2MM_231931 | NM_027013.2  | Scnm1     | sodium channel modifier 1                                                 |
| V2MM_105182 | NM_029022    | Scrn3     | secernin 3                                                                |
| V2MM_105184 | NM_029022    | Scrn3     | secernin 3                                                                |
| V2MM_73192  | NM_028776    | Scyl3     | SCY1-like 3 ( <i>S. cerevisiae</i> )                                      |
| V2MM_54719  | NM_172713    | Sdad1     | SDA1 domain containing 1                                                  |
| V2MM_4483   | NM_027301    | Sdro      | retinol dehydrogenase similar protein                                     |
| V2MM_58225  | NM_019951    | Sec11a    | Sec11-like 1                                                              |
| V2MM_43462  | NM_016906    | Sec61a1   | Sec61 alpha subunit homolog                                               |
| V2MM_70515  | NM_013657    | Sema3c    | semaphorin 3C                                                             |
| V2MM_65493  | NM_013660    | Sema4d    | semaphorin 4D                                                             |
| V2MM_25105  | NM_144851    | Senp1     | SUMO1/sentrin specific protease 1                                         |
| V2MM_73337  | NM_029457    | Senp2     | SUMO/sentrin specific peptidase 2                                         |
| V2MM_25478  | NM_027669    | Sept12    | septin 12                                                                 |
| V2MM_74487  | NM_011353    | Serf1     | small EDRK-rich factor 1                                                  |
| V2MM_70287  | NM_172852    | Serpinb13 | serine (or cysteine) proteinase inhibitor, clade B (ovalbumin), member 13 |
| V2MM_68315  | NM_030261    | Sesn3     | sestrin 3                                                                 |
| V2MM_196544 | NM_175465    | Sestd1    | SEC14 and spectrin domains 1                                              |
| V2MM_197866 | NM_175465    | Sestd1    | SEC14 and spectrin domains 1                                              |
| V2MM_119596 | NM_053099    | Setbp1    | SET binding protein 1                                                     |
| V2MM_91627  | NM_178391    | Setmar    | SET domain and mariner transposase fusion gene                            |
| V2MM_39589  | NM_133953    | Sf3b3     | splicing factor 3b, subunit 3                                             |
| V2MM_32390  | NM_009186    | Sfrs10    | splicing factor, arginine/serine-rich 10                                  |
| V2MM_64447  | NM_028148    | Sfrs2ip   | splicing factor, arginine/serine-rich 2, interacting protein              |

|             |                |          |                                                                                                                                               |
|-------------|----------------|----------|-----------------------------------------------------------------------------------------------------------------------------------------------|
| V2MM_49990  | NM_020587      | Sfrs4    | splicing factor, arginine/serine-rich 4 (SRp75)                                                                                               |
| V2MM_25395  | NM_145512      | Sft2d2   | SFT2 domain containing 2                                                                                                                      |
| V2MM_28074  | NM_009160      | Sftpd    | surfactant associated protein D                                                                                                               |
| V2MM_262429 | NM_199007      | Sgol2    | tripin                                                                                                                                        |
| V2MM_101499 | NM_177816      | Sh2d4b   | SH2 domain containing 4B                                                                                                                      |
| V2MM_56778  | NM_019989      | Sh3bgrl  | SH3-binding domain glutamic acid-rich protein like                                                                                            |
| V2MM_49838  | NM_021389      | Sh3kbp1  | SH3-domain kinase binding protein 1                                                                                                           |
| V2MM_129167 | NM_001081370   | Shank2   | SH3/ankyrin domain gene 2                                                                                                                     |
| V2MM_51176  | NM_172530      | She      | Src homology 2 domain containing E                                                                                                            |
| V2MM_53438  | NM_172530      | She      | Src homology 2 domain containing E                                                                                                            |
| V2MM_27048  | NM_009169      | Shfm1    | split hand/foot deleted gene 1                                                                                                                |
| V2MM_194544 | NM_172937      | Shprh    | SNF2 histone linker PHD RING helicase                                                                                                         |
| V2MM_195636 | NM_181590      | Shq1     | SHQ1 homolog                                                                                                                                  |
| V2MM_27836  | NM_145581      | Siglecf  | sialic acid binding Ig-like lectin 5                                                                                                          |
| V2MM_92427  | NM_178706      | Siglech  | SIGLEC-like protein                                                                                                                           |
| V2MM_151093 | NM_027498      | Sik3     | SIK family kinase 3 (Sik3)                                                                                                                    |
| V2MM_79280  | NM_011378      | Sin3a    | transcriptional regulator, SIN3A                                                                                                              |
| V2MM_17665  | NM_007547      | Sirpa    | signal-regulatory protein alpha                                                                                                               |
| V2MM_107842 | NM_001167691.1 | Sirt4    | sirtuin 4 (silent mating type information regulation 2 homolog                                                                                |
| V2MM_197465 | NM_178848      | Sirt5    | sirtuin 5 (silent mating type information regulation 2 homolog) 5                                                                             |
| V2MM_82419  | NM_009189      | Six1     | sine oculis homeobox homolog 1                                                                                                                |
| V2MM_66700  | NM_029444      | Six6os1  | Six6 opposite strand transcript 1                                                                                                             |
| V2MM_30817  | NM_030710      | Slamf6   | SLAM family member 6                                                                                                                          |
| V2MM_25715  | NM_134251      | Slc12a8  | solute carrier family 12, member 8                                                                                                            |
| V2MM_226164 | NM_028247      | Slc16a10 | solute carrier family 16 (monocarboxylic acid transporters), member 10                                                                        |
| V2MM_197325 | NM_182959      | Slc17a8  | vesicular glutamate transporter-3                                                                                                             |
| V2MM_67012  | NM_021712      | Slc18a3  | vesicular acetylcholine transporter                                                                                                           |
| V2MM_31159  | NM_148938      | Slc1a3   | solute carrier family 1 (glial high affinity glutamate transporter), member 3                                                                 |
| V2MM_97617  | NM_001159275.1 | Slc25a2  | solute carrier family 25 (mitochondrial carrier, ornithine transporter) member 2 (Slc25a2), nuclear gene encoding mitochondrial protein, mRNA |
| V2MM_56144  | NM_138756      | Slc25a36 | solute carrier family 25, member 36                                                                                                           |
| V2MM_103310 | NM_001081072   | Slc27a6  | solute carrier family 27 (fatty acid transporter), member 6                                                                                   |
| V2MM_27077  | NM_130451      | Slc2a10  | solute carrier family 2 member 10                                                                                                             |



|             |                |          |                                                                                |
|-------------|----------------|----------|--------------------------------------------------------------------------------|
| V2MM_39554  | NM_144798      | Slc30a6  | solute carrier family 30 (zinc transporter), member 6                          |
| V2MM_64969  | NM_028756      | Slc35a5  | solute carrier family 35, member A5                                            |
| V2MM_28382  | NM_144893      | Slc35c2  | solute carrier family 35, member C2                                            |
| V2MM_88565  | NM_175434      | Slc35f3  | solute carrier family 35, member F3                                            |
| V2MM_697    | NM_134086      | Slc38a1  | solute carrier family 38, member 1                                             |
| V2MM_190235 | NM_013901      | Slc39a1  | solute carrier family 39 (zinc transporter), member 1                          |
| V2MM_16233  | NM_145394      | Slc44a3  | solute carrier family 44, member 3                                             |
| V2MM_22038  | NM_021053      | Slc46a2  | solute carrier family 46, member 2                                             |
| V2MM_47617  | NM_027872      | Slc46a3  | solute carrier family 46, member 3                                             |
| V2MM_150642 | NM_001081162   | Slc4a11  | solute carrier family 4, sodium bicarbonate transporter-like, member 11        |
| V2MM_92414  | NM_178703      | Slc6a1   | solute carrier family 6 (neurotransmitter transporter, GABA), member 1         |
| V2MM_101230 | NM_028878      | Slc6a19  | solute carrier family 6, member 19                                             |
| V2MM_90477  | NM_177802      | Slc7a15  | aromatic-preferring amino acid transporter                                     |
| V2MM_92906  | NM_178798      | Slc7a6   | solute carrier family 7 (cationic amino acid transporter, y+ system), member 6 |
| V2MM_110215 | NM_001007567.2 | Slc7a6os | solute carrier family 7, member 6 opposite strand                              |
| V2MM_134822 | NM_001081332   | Slc9a5   | solute carrier family 9 (sodium/hydrogen exchanger), member 5                  |
| V2MM_91041  | NM_177909      | Slc9a9   | solute carrier family 9 (sodium/hydrogen exchanger), member 9                  |
| V2MM_50757  | NM_172658      | Slco4c1  | solute carrier organic anion transporter family, member 4C1                    |
| V2MM_58057  | NM_172658      | Slco4c1  | solute carrier organic anion transporter family, member 4C1                    |
| V2MM_52595  | NM_172796      | Slfn9    | schlafen 9                                                                     |
| V2MM_89324  | NM_177570      | Slfnl1   | schlafen like 1                                                                |
| V2MM_88810  | NM_175499      | Slitrk6  | neuronal transmembrane protein Slitrk6                                         |
| V2MM_65332  | NM_028887      | Smchd1   | SMC hinge domain containing 1                                                  |
| V2MM_115574 | NM_009214      | Sms      | spermine synthase                                                              |
| V2MM_227    | NM_027188      | Smyd3    | SET and MYND domain containing 3                                               |
| V2MM_57460  | NM_177009      | Smyd4    | SET and MYND domain containing 4                                               |
| V2MM_84964  | NM_029949      | Snpc3    | small nuclear RNA activating complex, polypeptide 3                            |
| V2MM_190940 | NM_198214      | Snph     | syntaphilin                                                                    |

|             |                |         |                                                          |
|-------------|----------------|---------|----------------------------------------------------------|
| V2MM_43419  | NM_016667      | Sntb1   | syntrophin, basic 1                                      |
| V2MM_52361  | NM_016667      | Sntb1   | syntrophin, basic 1                                      |
| V2MM_50459  | NM_029068      | Snx16   | sorting nexin 16                                         |
| V2MM_205000 | NM_028874      | Snx19   | sorting nexin 19                                         |
| V2MM_224726 | NM_175407      | Sobp    | sine oculis-binding protein homolog                      |
| V2MM_64214  | NM_013671      | Sod2    | superoxide dismutase 2, mitochondrial                    |
| V2MM_31907  | NM_009166      | Sorbs1  | sorbin and SH3 domain containing 1                       |
| V2MM_72051  | NM_011366      | Sorbs3  | sorbin and SH3 domain containing 3                       |
| V2MM_27080  | NM_009234      | Sox11   | SRY-box 11                                               |
| V2MM_174034 | NM_001005343.2 | Sp9     | trans-acting transcription factor 9                      |
| V2MM_41142  | NM_029160      | Spag16  | sperm associated antigen 16                              |
| V2MM_84840  | NM_029599      | Spag4l  | spermatogenesis-related gene 4                           |
| V2MM_57692  | NM_172561      | Spag7   | sperm associated antigen 7                               |
| V2MM_43487  | NM_010097      | Sparcl1 | SPARC-like 1 (mast9, hevin)                              |
| V2MM_53590  | NM_010097      | Sparcl1 | SPARC-like 1 (mast9, hevin)                              |
| V2MM_203574 | NM_016962      | Spast   | spastic paraplegia 4 homolog                             |
| V2MM_60973  | NM_021343      | Spata5  | spermatogenesis associated 5                             |
| V2MM_205982 | NM_029701      | Spcs3   | signal peptidase complex subunit 3                       |
| V2MM_60414  | NM_028561      | Speer4b | spermatogenesis associated glutamate (E)-rich protein 4b |
| V2MM_34138  | NM_145531      | Spg11   | spastic paraplegia 11                                    |
| V2MM_94347  | NM_183136      | Spink8  | serine protease inhibitor Kazal type 8                   |
| V2MM_152084 | NM_194355      | Spire1  | Spir-1 protein                                           |
| V2MM_192576 | NM_175836      | Spnb2   | spectrin beta 2                                          |
| V2MM_188880 | NM_032610      | Spnb4   | spectrin beta 4                                          |
| V2MM_50652  | NM_029269      | Spp2    | secreted phosphoprotein 24                               |
| V2MM_77180  | NM_033524      | Spred1  | sprouty-related protein 1 with EVH-1 domain              |
| V2MM_11001  | NM_011468      | Sprr2a  | small proline-rich protein 2A                            |
| V2MM_2906   | NM_011468      | Sprr2a  | small proline-rich protein 2A                            |
| V2MM_37453  | NM_011896      | Spry1   | sprouty homolog 1                                        |
| V2MM_29483  | NM_011898      | Spry4   | sprouty homolog 4                                        |
| V2MM_99620  | NM_025716      | Spryd4  | SPRY domain containing 4                                 |
| V2MM_226830 | NM_175318      | Spty2d1 | SPT2, Suppressor of Ty, domain containing 1              |
| V2MM_28883  | NM_009270      | Sqle    | squalene epoxidase                                       |
| V2MM_60892  | NM_020611      | Srd5a2l | steroid 5 alpha-reductase 2-like                         |
| V2MM_26624  | NM_020493      | Srf     | serum response factor                                    |
| V2MM_107524 | NM_025691      | Srp72   | signal recognition particle72                            |
| V2MM_108552 | NM_028358      | Ssbp1   | single-stranded DNA binding protein 1                    |
| V2MM_36556  | NM_024186      | Ssbp2   | single-stranded DNA binding protein 2                    |
| V2MM_81801  | NM_025448      | Ssr2    | signal sequence receptor, beta                           |

|             |                |          |                                                          |
|-------------|----------------|----------|----------------------------------------------------------|
| V2MM_30896  | NM_023546      | Ssty2    | spermiogenesis specific transcript on the Y 2            |
| V2MM_86894  | NM_173868      | St18     | suppression of tumorigenicity 18                         |
| V2MM_190109 | NM_153124      | St8sia5  | sialyltransferase 8E                                     |
| V2MM_54073  | NM_021465      | Stag2    | stromal antigen 2                                        |
| V2MM_32020  | NM_024270      | Stard3nl | MLN64 N-terminal homolog                                 |
| V2MM_13428  | NM_054098      | Steap4   | Tnfa-induced adipose-related protein                     |
| V2MM_104453 | NM_175031      | Stk36    | serine/threonine kinase36                                |
| V2MM_87418  | NM_175162      | Stox2    | storkhead box 2                                          |
| V2MM_29477  | NM_133789      | Strn4    | zinedin                                                  |
| V2MM_32276  | NM_019879      | Suclg1   | succinate-CoA ligase, GDP-forming, alpha subunit         |
| V2MM_42461  | NM_153532      | Suhw3    | suppressor of hairy wing homolog 3                       |
| V2MM_98061  | NM_001184981.1 | Sult2a7  | sulfotransferase family 2A, dehydroepiandrosterone (DHEA |
| V2MM_25467  | NM_009296      | Supt4h1  | suppressor of Ty 4 homolog 1                             |
| V2MM_193482 | NM_175683      | Suv39h2  | suppressor of variegation 3-9 homologue 2                |
| V2MM_225170 | NM_199196      | Suz12    | suppressor of zeste 12 homolog                           |
| V2MM_39591  | NM_009299      | Sva      | seminal vesicle antigen                                  |
| V2MM_195103 | NM_178046      | Svil     | supervillin                                              |
| V2MM_91165  | NM_178046      | Svil     | supervillin                                              |
| V2MM_71849  | NM_013680      | Syn1     | synapsin I                                               |
| V2MM_37715  | NM_019666      | Syncrip  | NS1-associated protein 1                                 |
| V2MM_47097  | NM_021482      | Syngr4   | synaptogyrin 4                                           |
| V2MM_37736  | NM_080451      | Synpo2   | synaptopodin 2                                           |
| V2MM_145010 | NM_080451.2    | Synpo2   | synaptopodin 2                                           |
| V2MM_25881  | NM_030725      | Syt13    | synaptotagmin XIII                                       |
| V2MM_38032  | NM_009308      | Syt4     | synaptotagmin 4                                          |
| V2MM_30841  | NM_031393      | Syt11    | synaptotagmin-like 1                                     |
| V2MM_23856  | NM_031394      | Syt12    | synaptotagmin-like 2                                     |
| V2MM_113484 | NM_001007266   | Taar2    | trace amine-associated receptor 2                        |
| V2MM_113515 | NM_001010830   | Taar8a   | trace amine-associated receptor 8A                       |
| V2MM_22695  | NM_009311      | Tac1     | tachykinin 1                                             |
| V2MM_60026  | NM_001081288   | Taf2     | TBP-associated factor 2                                  |
| V2MM_51322  | NM_145968      | Tagap    | T-cell activation Rho GTPase-activating protein          |
| V2MM_86731  | NM_173764      | Tapt1    | transmembrane anterior posterior transformation 1        |
| V2MM_110341 | NM_001159907.1 | Tarbp1   | TAR (HIV-1) RNA binding protein 1 (Tarbp1), mRNA         |
| V2MM_55741  | NM_020501      | Tas2r105 | taste receptor, type 2, member 105                       |
| V2MM_87374  | NM_175151      | Tatdn1   | TatD DNase domain containing 1                           |
| V2MM_14548  | NM_134023      | Tbc1d10a | TBC1 domain family, member 10a                           |
| V2MM_38513  | NM_133910      | Tbc1d14  | TBC1 domain family, member 14                            |
| V2MM_114214 | NM_029057.1    | Tbc1d30  | TBC1 domain family, member 30                            |

|             |                |          |                                                          |
|-------------|----------------|----------|----------------------------------------------------------|
| V2MM_202223 | NM_028162      | Tbc1d5   | TBC1 domain family, member 5                             |
| V2MM_30258  | NM_030732      | Tbl1xr1  | IRA1 protein                                             |
| V2MM_27759  | NM_027762      | Tchhl1   | trichohyalin-like 1                                      |
| V2MM_36952  | NM_027762      | Tchhl1   | trichohyalin-like 1                                      |
| V2MM_18108  | NM_018756      | Tcstv1   | 2-cell-stage, variable group, member 1                   |
| V2MM_132544 | NM_022311      | Tcte2    | t-complex-associated testis expressed 2                  |
| V2MM_26680  | NM_019911      | Tdo2     | tryptophan 2,3-dioxygenase                               |
| V2MM_37456  | NM_031384      | Tex11    | testis expressed gene 11                                 |
| V2MM_20964  | NM_031386      | Tex14    | testis expressed gene 14                                 |
| V2MM_33515  | NM_009361      | Tfdp1    | transcription factor Dp 1                                |
| V2MM_83196  | NM_011576      | Tfpi     | tissue factor pathway inhibitor                          |
| V2MM_32442  | NM_009373      | Tgm2     | transglutaminase 2, C polypeptide                        |
| V2MM_29339  | NM_009378      | Thbd     | thrombomodulin                                           |
| V2MM_124292 | NM_207278      | Tigd4    | tigger transposable element derived 4                    |
| V2MM_225683 | NM_178646      | Tigd5    | tigger transposable element derived 5                    |
| V2MM_72707  | NM_013899      | Timm10   | translocase of inner mitochondrial membrane 13 homolog a |
| V2MM_204309 | NM_001037744   | Timm8a2  | translocase of inner mitochondrial membrane 8 homolog a2 |
| V2MM_80336  | NM_029360      | Tm4sf5   | transmembrane 4 superfamily member 5                     |
| V2MM_232147 | NM_026281      | Tm7sf3   | transmembrane 7 superfamily member 3                     |
| V2MM_33961  | NM_133847      | Tm9sf4   | transmembrane 9 superfamily protein member 4             |
| V2MM_225020 | NM_177695      | Tmc3     | transmembrane channel-like gene family 3                 |
| V2MM_196065 | NM_178874      | Tmcc2    | transmembrane and coiled-coil domains 2                  |
| V2MM_32338  | NM_001039483   | Tmco1    | putative membrane protein                                |
| V2MM_65695  | NM_172998      | Tmem118  | transmembrane protein 118                                |
| V2MM_39269  | NM_028343      | Tmem135  | hypothetical protein LOC72759                            |
| V2MM_194272 | NM_175350      | Tmem146  | transmembrane protein 146                                |
| V2MM_49928  | NM_177260      | Tmem154  | hypothetical protein LOC320782                           |
| V2MM_92776  | NM_178773      | Tmem16d  | transmembrane protein 16D                                |
| V2MM_57268  | NM_025326      | Tmem176a | hepatocellular carcinoma-associated antigen 112          |
| V2MM_52847  | NM_020588      | Tmem183a | hypothetical protein LOC57439                            |
| V2MM_81912  | NM_025708      | Tmem186  | hypothetical protein LOC66690                            |
| V2MM_166659 | NM_001164683.1 | Tmem29   | transmembrane protein 29                                 |
| V2MM_39660  | NM_133718      | Tmem30a  | transmembrane protein 30A                                |
| V2MM_29642  | NM_019631      | Tmem45a  | transmembrane protein 45a                                |
| V2MM_93253  | NM_178936      | Tmem56   | transmembrane protein 56                                 |
| V2MM_93253  | NM_178936      | Tmem56   | transmembrane protein 56                                 |
| V2MM_206290 | NM_175259      | Tmem58   | transmembrane protein 58                                 |

|             |                |           |                                                                     |
|-------------|----------------|-----------|---------------------------------------------------------------------|
| V2MM_23081  | NM_019801      | Tmem59    | thymic dendritic cell-derived factor 1                              |
| V2MM_89462  | NM_177601      | Tmem60    | transmembrane protein 60                                            |
| V2MM_225630 | NM_175285      | Tmem62    | transmembrane protein 62                                            |
| V2MM_95717  | NM_198167      | Tmem63b   | transmembrane protein 63b                                           |
| V2MM_26919  | NM_024246      | Tmem79    | hypothetical protein LOC71913                                       |
| V2MM_27429  | NM_027797      | Tmem80    | hypothetical protein LOC71448                                       |
| V2MM_96462  | NM_001033233   | Tmprss11a | transmembrane protease, serine 11a                                  |
| V2MM_134929 | NM_001013373   | Tmprss13  | transmembrane protease, serine 13                                   |
| V2MM_239118 | NM_001033535   | Tnfaip8l3 | tumor necrosis factor, alpha-induced protein 8-like 3               |
| V2MM_38323  | NM_020275      | Tnfrsf10b | tumor necrosis factor receptor superfamily, member 10b              |
| V2MM_103765 | NM_001163635.1 | Tnks2     | tankyrase, TRF1-interacting ankyrin-related ADP-ribose polymerase 2 |
| V2MM_49719  | NM_009407      | Tnp1      | transition protein 1                                                |
| V2MM_83612  | NM_022312      | Tnr       | tenascin R                                                          |
| V2MM_134196 | NM_001122730.1 | Tnrc18    | trinucleotide repeat containing 18                                  |
| V2MM_100114 | NM_198022      | Tnrc6c    | trinucleotide repeat containing 6C                                  |
| V2MM_57620  | NM_172609      | Tomm22    | translocase of outer mitochondrial membrane 22 homolog              |
| V2MM_47658  | NM_138599      | Tomm70a   | translocase of outer mitochondrial membrane 70 homolog A            |
| V2MM_2912   | NM_031187      | Tpsab1    | mast cell protease 7                                                |
| V2MM_225687 | NM_199257      | Tpte      | transmembrane phosphatase with tensin homology                      |
| V2MM_54487  | NM_009186      | Tra2b     | transformer 2 beta homolog (Drosophila)                             |
| V2MM_84875  | NM_029726      | Trdn      | triadin                                                             |
| V2MM_44075  | NM_009426      | Trh       | thyrotropin releasing hormone                                       |
| V2MM_29862  | NM_146241      | Trhde     | thyrotropin-releasing hormone degrading ectoenzyme                  |
| V2MM_191963 | NM_145076      | Trim24    | tripartite motif protein 24                                         |
| V2MM_189185 | NM_053170      | Trim33    | tripartite motif protein 33                                         |
| V2MM_97550  | NM_001033235   | Trim40    | tripartite motif-containing 40                                      |
| V2MM_97554  | NM_001033235   | Trim40    | tripartite motif-containing 40                                      |
| V2MM_111323 | NM_001034906.2 | Trim43a   | tripartite motif-containing 43A                                     |
| V2MM_51874  | NM_021447      | Trim54    | tripartite motif-containing 54                                      |
| V2MM_59288  | NM_173378      | Trp53bp2  | tumor protein p53 binding protein, 2                                |
| V2MM_226290 | NM_178111      | Trp53inp2 | tumor protein p53 inducible nuclear protein 2                       |
| V2MM_27178  | NM_032000      | Trps1     | zinc finger transcription factor TRPS1                              |
| V2MM_60544  | NM_010286      | Tsc22d3   | glucocorticoid-induced leucine zipper                               |

|             |                |         |                                                                    |
|-------------|----------------|---------|--------------------------------------------------------------------|
| V2MM_22304  | NM_146010      | Tspan8  | tetraspanin 8                                                      |
| V2MM_202710 | NM_175414      | Tspan9  | tetraspan NET-5                                                    |
| V2MM_194214 | NM_183096      | Ttc29   | tetratricopeptide repeat domain 29                                 |
| V2MM_100334 | NM_029321      | Ttc32   | tetratricopeptide repeat domain 32                                 |
| V2MM_100788 | NM_001033213.1 | Ttc7b   | tetratricopeptide repeat domain 7B                                 |
| V2MM_103581 | NM_027412      | Ttc9c   | tetratricopeptide repeat domain 9C                                 |
| V2MM_27239  | NM_146190      | Tubgcp5 | tubulin, gamma complex associated protein 5                        |
| V2MM_80212  | NM_013698      | Txk     | TXK tyrosine kinase                                                |
| V2MM_11751  | NM_145367      | Txndc5  | thioredoxin domain containing 5                                    |
| V2MM_60797  | NM_016792      | Txnl1   | thioredoxin-like 1                                                 |
| V2MM_35966  | NM_145598      | Txnl6   | thioredoxin-like 6                                                 |
| V2MM_197079 | NM_172474      | Tyw3    | tRNA-yW synthesizing protein 3 homolog                             |
| V2MM_46218  | NM_009457      | Ube1x   | ubiquitin-activating enzyme E1, Chr X                              |
| V2MM_56178  | NM_009459      | Ube2h   | ubiquitin-conjugating enzyme E2H                                   |
| V2MM_58951  | NM_019949      | Ube2l6  | E2 ubiquitin conjugating enzyme                                    |
| V2MM_226909 | NM_173755      | Ube2o   | ubiquitin-conjugating enzyme E2O                                   |
| V2MM_96010  | NM_173755      | Ube2o   | ubiquitin-conjugating enzyme E2O                                   |
| V2MM_28534  | NM_172300      | Ube2z   | ubiquitin-conjugating enzyme E2Z                                   |
| V2MM_40176  | NM_026842      | Ubqln1  | ubiquilin 1                                                        |
| V2MM_91652  | NM_178397      | Ubx8    | protein expressed in T-cells and eosinophils in atopic dermatitis  |
| V2MM_261839 | NM_033607      | Uchl4   | ubiquitin carboxyl-terminal esterase L4                            |
| V2MM_104592 | NM_198899      | Ugcgl1  | UDP-glucose ceramide glucosyltransferase-like 1                    |
| V2MM_220943 | NM_053184      | Ugt2a1  | UDP glucuronosyltransferase 2 family, polypeptide A1               |
| V2MM_60150  | NM_009467      | Ugt2b5  | UDP glucuronosyltransferase 2 family, polypeptide B5               |
| V2MM_204151 | NM_011307      | Uimc1   | retinoid X receptor interacting protein 110                        |
| V2MM_92273  | NM_178680      | Unc45b  | cardiomyopathy associated 4                                        |
| V2MM_4880   | NM_029770      | Unc5b   | unc-5 homolog B                                                    |
| V2MM_55597  | NM_009472      | Unc5c   | unc-5 homolog C                                                    |
| V2MM_45471  | NM_172569      | Unk     | zinc finger CCCH type containing 5                                 |
| V2MM_226542 | NM_028789      | Unkl    | unkempt-like                                                       |
| V2MM_42739  | NM_133995      | Upb1    | ureidopropionase, beta                                             |
| V2MM_63769  | NM_025710      | Uqcifs1 | ubiquinol-cytochrome c reductase, Rieske iron-sulfur polypeptide 1 |
| V2MM_189412 | NM_153677      | Ush1c   | harmonin                                                           |
| V2MM_225211 | NM_011669      | Usp12   | ubiquitin specific protease 12                                     |
| V2MM_105836 | NM_001013024   | Usp13   | ubiquitin specific protease 13 (isopeptidase T-3)                  |
| V2MM_105836 | NM_001013024   | Usp13   | ubiquitin specific protease 13 (isopeptidase T-3)                  |
| V2MM_46677  | NM_016808      | Usp2    | ubiquitin-specific protease 2                                      |

|             |                |         |                                                                |
|-------------|----------------|---------|----------------------------------------------------------------|
| V2MM_94739  | NM_183225      | Usp24   | ubiquitin specific peptidase 24                                |
| V2MM_24548  | NM_031388      | Usp26   | ubiquitin specific protease 26                                 |
| V2MM_39649  | NM_144937      | Usp3    | ubiquitin specific protease 3                                  |
| V2MM_206002 | NM_001033291   | Usp40   | ubiquitin specific peptidase 40                                |
| V2MM_86678  | NM_173754      | Usp43   | ubiquitin specific protease 43                                 |
| V2MM_85328  | NM_133992      | Usp52   | ubiquitin specific protease 52                                 |
| V2MM_93431  | NM_181399      | Usp6nl  | USP6 N-terminal like                                           |
| V2MM_99535  | NM_175158.3    | Utp20   | UTP20, small subunit (SSU                                      |
| V2MM_15548  | NM_053228      | V1rb7   | vomeronasal 1 receptor, B7                                     |
| V2MM_31561  | NM_134436      | V1rc33  | vomeronasal 1 receptor, C33                                    |
| V2MM_40036  | NM_030735      | V1rd9   | vomeronasal 1 receptor, D9                                     |
| V2MM_49433  | NM_145848      | V1re13  | vomeronasal 1 receptor, E13                                    |
| V2MM_10147  | NM_134195      | V1re6   | vomeronasal 1 receptor, E6                                     |
| V2MM_59963  | NM_145842      | V1re9   | vomeronasal 1 receptor, E9                                     |
| V2MM_39556  | NM_134203      | V1rg2   | vomeronasal 1 receptor, G2                                     |
| V2MM_262047 | NM_134206      | V1rg5   | vomeronasal 1 receptor, G5                                     |
| V2MM_23109  | NM_134210      | V1rg9   | vomeronasal 1 receptor, G9                                     |
| V2MM_39380  | NM_134210      | V1rg9   | vomeronasal 1 receptor, G9                                     |
| V2MM_35579  | NM_134212      | V1rh3   | vomeronasal 1 receptor, H3                                     |
| V2MM_31028  | NM_134218      | V1rh9   | vomeronasal 1 receptor, H9                                     |
| V2MM_28175  | NM_019917      | V2r1b   | vomeronasal2, receptor, 1b                                     |
| V2MM_49736  | NM_016796      | Vamp4   | vesicle-associated membrane protein 4                          |
| V2MM_49877  | NM_016872      | Vamp5   | vesicle-associated membrane protein 5                          |
| V2MM_76601  | NM_177393      | Vgcnl1  | voltage gated channel like 1                                   |
| V2MM_196750 | NM_175237      | Vmn2r29 | vomeronasal 2, receptor 29                                     |
| V2MM_241287 | NM_001105059.1 | Vmn2r62 | vomeronasal 2, receptor 62                                     |
| V2MM_90874  | NM_177876      | Vps37b  | vacuolar protein sorting 37B                                   |
| V2MM_107797 | NM_001033311.3 | Vsig10  | V-set and immunoglobulin domain containing 10                  |
| V2MM_46669  | NM_016862      | Vti1a   | vesicle transport through interaction with t-SNAREs homolog 1A |
| V2MM_44272  | NM_031877      | Wasf1   | WASP family 1                                                  |
| V2MM_224329 | NM_011712      | Wbp5    | WW domain binding protein 5                                    |
| V2MM_43801  | NM_025362      | Wbscr18 | Williams-Beuren syndrome critical region 18                    |
| V2MM_44099  | NM_025362      | Wbscr18 | Williams-Beuren syndrome critical region 18                    |
| V2MM_84855  | NM_029681      | Wbscr28 | hypothetical protein LOC76629                                  |
| V2MM_50430  | NM_027963      | Wdr16   | WD40-repeat protein upregulated in HCC                         |
| V2MM_33013  | NM_028220      | Wdr17   | WD repeat domain 17                                            |
| V2MM_86617  | NM_173741      | Wdr24   | WD repeat domain 24                                            |
| V2MM_35453  | NM_145514      | Wdr26   | WD repeat domain 26                                            |
| V2MM_39155  | NM_026893      | Wdr40a  | WD repeat domain 40A                                           |
| V2MM_48735  | NM_153555      | Wdr42a  | H326                                                           |
| V2MM_93435  | NM_181400      | Wdr47   | WD repeat domain 47                                            |

|             |                |         |                                                       |
|-------------|----------------|---------|-------------------------------------------------------|
| V2MM_83935  | NM_026236      | Wdr48   | WD repeat domain 48                                   |
| V2MM_84718  | NM_028976      | Wdr48   | WD repeat domain 48                                   |
| V2MM_81711  | NM_172864      | Wdr63   | WD repeat domain 63                                   |
| V2MM_203995 | NM_001081396   | Wdr67   | WD repeat domain 67                                   |
| V2MM_27311  | NM_027432      | Wdr77   | WD repeat domain 77                                   |
| V2MM_24830  | NM_146254      | Wdr78   | WD repeat domain 78                                   |
| V2MM_53302  | NM_009519      | Wnt11   | wingless-related MMTV integration site 11             |
| V2MM_74174  | NM_030215      | Wrnip1  | Werner helicase interacting protein 1                 |
| V2MM_195102 | NM_175394      | Wtap    | Wilms'tumour 1-associating protein                    |
| V2MM_22143  | NM_023500      | Xk      | Kell blood group precursor (McLeod phenotype) homolog |
| V2MM_87673  | NM_023045      | Xpo7    | exportin 7                                            |
| V2MM_53798  | NM_009534      | Yap1    | yes-associated protein 1                              |
| V2MM_28522  | NM_145550      | Yipf1   | Yip1 domain family, member 1                          |
| V2MM_34723  | NM_023784      | Yipf7   | Yip1 domain family, member 7                          |
| V2MM_74045  | NM_013771      | Yme111  | YME1-like 1                                           |
| V2MM_99980  | NM_001005341   | Ypel2   | yippee-like 2                                         |
| V2MM_15297  | NM_145393      | Ythdf2  | high glucose-regulated protein 8                      |
| V2MM_48116  | NM_021397      | Zbtb32  | repressor of GATA                                     |
| V2MM_88985  | NM_175537      | Zbtb38  | zinc finger and BTB domain containing 38              |
| V2MM_99821  | NM_029348.2    | Zbtb4   | zinc finger and BTB domain containing 4               |
| V2MM_30875  | NM_133879      | Zbtb48  | GLI-Kruppel family member HKR3                        |
| V2MM_48703  | NM_173399      | Zbtb5   | zinc finger and BTB domain containing 5               |
| V2MM_29314  | NM_146253      | Zbtb6   | zinc finger protein 482                               |
| V2MM_130488 | NM_001162921.1 | Zc3h12c | zinc finger CCCH type containing 12C                  |
| V2MM_101667 | NM_026083      | Zc3h13  | RIKEN cDNA3110050K21                                  |
| V2MM_42790  | NM_020594      | Zc3h8   | zinc finger CCCH type containing 8                    |
| V2MM_240458 | NM_001101433.1 | Zcchc24 | zinc finger, CCHC domain containing 24                |
| V2MM_112776 | NM_028673.1    | Zdbf2   | zinc finger, DBF-type containing 2                    |
| V2MM_233254 | NM_027306      | Zdhhc25 | zinc finger, DHHC domain containing 25                |
| V2MM_32596  | NM_172465      | Zdhhc9  | zinc finger, DHHC domain containing 9                 |
| V2MM_59561  | NM_009540      | Zfa     | zinc finger autosomal protein                         |
| V2MM_58353  | NM_021307      | Zfp112  | zinc finger protein 112                               |
| V2MM_61065  | NM_009547      | Zfp161  | zinc finger protein 161                               |
| V2MM_140942 | NM_001081217   | Zfp174  | zinc finger protein 174                               |
| V2MM_59103  | NM_139141      | Zfp192  | zinc finger protein 192                               |
| V2MM_58962  | NM_001044697   | Zfp2    | zinc finger protein 2                                 |
| V2MM_37841  | NM_148924      | Zfp263  | zinc finger protein 263                               |
| V2MM_83253  | NM_011754      | Zfp27   | zinc finger protein 27                                |
| V2MM_87793  | NM_175247      | Zfp28   | zinc finger protein 28                                |



|             |                |         |                                              |
|-------------|----------------|---------|----------------------------------------------|
| V2MM_89663  | NM_177643      | Zfp281  | zinc finger protein 281                      |
| V2MM_23789  | NM_146175      | Zfp282  | zinc finger protein 282                      |
| V2MM_40042  | NM_030743      | Zfp313  | zinc finger protein 313                      |
| V2MM_108838 | NM_001081007   | Zfp382  | zinc finger protein 382                      |
| V2MM_84161  | NM_027007      | Zfp397  | zinc finger protein 397                      |
| V2MM_161036 | NM_001033451   | Zfp408  | zinc finger protein 408                      |
| V2MM_30858  | NM_146179      | Zfp418  | zinc finger protein 418                      |
| V2MM_35402  | NM_146179      | Zfp418  | zinc finger protein 418                      |
| V2MM_77979  | NM_172867      | Zfp462  | zinc finger protein 462                      |
| V2MM_2704   | NM_153063      | Zfp472  | zinc finger protein 472                      |
| V2MM_92567  | NM_178734      | Zfp473  | zinc finger protein 473                      |
| V2MM_92569  | NM_178734      | Zfp473  | zinc finger protein 473                      |
| V2MM_63386  | NM_025749      | Zfp474  | zinc finger protein 474                      |
| V2MM_134204 | NM_001081431.1 | Zfp498  | zinc finger protein 498                      |
| V2MM_94102  | NM_183033      | Zfp516  | zinc finger protein 516                      |
| V2MM_94411  | NM_183149      | Zfp598  | zinc finger protein 598                      |
| V2MM_48627  | NM_009561      | Zfp61   | zinc finger protein 61                       |
| V2MM_189471 | NM_026856      | Zfp644  | zinc finger motif enhancer binding protein 2 |
| V2MM_90363  | NM_177783      | Zfp650  | zinc finger protein 650                      |
| V2MM_227487 | NM_175163      | Zfp689  | zinc finger protein HIT-39                   |
| V2MM_92729  | NM_178763      | Zfp750  | zinc finger protein 750                      |
| V2MM_108601 | NM_001081382   | Zfp777  | zinc finger protein 777                      |
| V2MM_197664 | NM_177882      | Zfp786  | zinc finger protein 786                      |
| V2MM_33867  | NM_145612      | Zfp810  | zinc finger protein ZFP                      |
| V2MM_197293 | NM_023750      | Zfp84   | zinc finger protein 84                       |
| V2MM_55020  | NM_016684      | Zfp96   | zinc finger protein 96                       |
| V2MM_39126  | NM_024231      | Zfpl1   | zinc finger like protein 1                   |
| V2MM_100683 | NM_001008550   | Zfyve26 | zinc finger, FYVE domain containing 26       |
| V2MM_48177  | NM_177319      | Zfyve27 | zinc finger, FYVE domain containing 27       |
| V2MM_106890 | NM_183300      | Zfyve9  | zinc finger, FYVE domain containing 9        |
| V2MM_23739  | NM_144894      | Zgpat   | zinc finger, CCCH-type with G patch domain   |
| V2MM_32312  | NM_023547      | Znhit4  | PAP-1 binding protein                        |
| V2MM_93017  | NM_178889      | Zscan29 | zinc finger SCAN domains 29                  |
| V2MM_16543  | NM_026507      | Zwilch  | Zwilch                                       |
| V2MM_94214  | NM_001081473   | Zxdb    | zinc finger, X-linked, duplicated B          |
| V2MM_219719 | NM_030260      | Zxdc    | ZXD family zinc finger C                     |

**Supplementary Table S3**

Overlapping set of genes from transcriptional data and screening data. Genes that were significantly transcriptionally upregulated in leukemia cells harvested from the blood of mice relative to leukemia cells maintained in culture, and genes that were targeted by hairpins that depleted at least four-fold *in vivo* and less than 25% *in vitro*.

|          |                                                                                     |
|----------|-------------------------------------------------------------------------------------|
| Adam19   | a disintegrin and metallopeptidase domain 19                                        |
| Abhd1    | abhydrolase domain containing 1                                                     |
| Acox3    | acyl-Coenzyme A oxidase 3, pristanoyl                                               |
| Arf2     | ADP-ribosylation factor 2                                                           |
| Aff1     | AF4/FMR2 family, member 1                                                           |
| Arrb1    | arrestin, beta 1                                                                    |
| Atg2a    | ATG2 autophagy related 2 homolog A ( <i>S. cerevisiae</i> )                         |
| Atp13a2  | ATPase type 13A2                                                                    |
| Atp7a    | ATPase, Cu <sup>++</sup> transporting, alpha polypeptide                            |
| Btg1     | B-cell translocation gene 1, anti-proliferative                                     |
| Bbs4     | Bardet-Biedl syndrome 4 (human)                                                     |
| Baz2b    | bromodomain adjacent to zinc finger domain, 2B                                      |
| Cabin1   | calcineurin binding protein 1                                                       |
| Cabin1   | calcineurin binding protein 1                                                       |
| Cask     | calcium/calmodulin-dependent serine protein kinase (MAGUK family)                   |
| Ctsc     | cathepsin C                                                                         |
| Cd177    | CD177 antigen                                                                       |
| BC006779 | cDNA sequence BC006779                                                              |
| Ccr1     | chemokine (C-C motif) receptor-like 1                                               |
| Chrnbl   | cholinergic receptor, nicotinic, beta polypeptide 1 (muscle)                        |
| Chd8     | chromodomain helicase DNA binding protein 8                                         |
| Cobll1   | Cobl-like 1                                                                         |
| Ccdc84   | coiled-coil domain containing 84                                                    |
| Ctdsp2   | CTD (carboxy-terminal domain, RNA polymerase II, polypeptide A) small phosphatase 2 |
| BC035295 | cysteine-serine-rich nuclear protein 2                                              |
| Cyth2    | cytohesin 2                                                                         |
| Dcaf8    | DDB1 and CUL4 associated factor 8                                                   |
| Diablo   | diablo homolog ( <i>Drosophila</i> )                                                |
| Dvl1     | dishevelled, dsh homolog 1 ( <i>Drosophila</i> )                                    |
| Dnajb9   | DnaJ (Hsp40) homolog, subfamily B, member 9                                         |
| Emr4     | EGF-like module containing, mucin-like, hormone receptor-like sequence 4            |
| Efna1    | ephrin A1                                                                           |
| Fam160a2 | family with sequence similarity 160, member A2                                      |
| Fam193a  | family with sequence similarity 193, member A                                       |
| Glb1l    | galactosidase, beta 1-like                                                          |
| Gpcpd1   | glycerophosphocholine phosphodiesterase GDE1 homolog ( <i>S. cerevisiae</i> )       |
| Gvin1    | GTPase, very large interferon inducible 1                                           |
| H2afj    | H2A histone family, member J                                                        |
| Hspa1b   | heat shock protein 1B                                                               |
| Herc3    | hect domain and RLD 3                                                               |
| Hps5     | Hermansky-Pudlak syndrome 5 homolog (human)                                         |

|              |                                                                        |
|--------------|------------------------------------------------------------------------|
| Hmha1        | histocompatibility (minor) HA-1                                        |
| Ikbip        | IKBKB interacting protein                                              |
| Itpkb        | inositol 1,4,5-trisphosphate 3-kinase B                                |
| Itm2b        | integral membrane protein 2B                                           |
| Klhl17       | kelch-like 17 (Drosophila)                                             |
| Klhl6        | kelch-like 6 (Drosophila)                                              |
| L3mbtl3      | l(3)mbt-like 3 (Drosophila)                                            |
| Lrrn3        | leucine rich repeat protein 3, neuronal                                |
| Lif          | leukemia inhibitory factor                                             |
| Lnx2         | ligand of numb-protein X 2                                             |
| Lmo2         | LIM domain only 2                                                      |
| Mmp9         | matrix metalloproteinase 9                                             |
| Ms4a6c       | membrane-spanning 4-domains, subfamily A, member 6C                    |
| Morc3        | microrchidia 3                                                         |
| Mgst1        | microsomal glutathione S-transferase 1                                 |
| Myh9         | myosin, heavy polypeptide 9, non-muscle                                |
| Myh9         | myosin, heavy polypeptide 9, non-muscle                                |
| Nfe2l1       | nuclear factor, erythroid derived 2,-like 1                            |
| Nfe2l1       | nuclear factor, erythroid derived 2,-like 1                            |
| Ostm1        | osteopetrosis associated transmembrane protein 1                       |
| Pdrg1        | p53 and DNA damage regulated 1                                         |
| Pon2         | paraoxonase 2                                                          |
| Pdzd2        | PDZ domain containing 2                                                |
| Pex1         | peroxisomal biogenesis factor 1                                        |
| Phacr2       | phosphatase and actin regulator 2                                      |
| Ppap2a       | phosphatidic acid phosphatase type 2A                                  |
| Pik3r3       | phosphatidylinositol 3 kinase, regulatory subunit, polypeptide 3 (p55) |
| Plac8        | placenta-specific 8                                                    |
| Pafah1b3     | platelet-activating factor acetylhydrolase, isoform 1b, subunit 3      |
| Plekhn1      | pleckstrin homology domain containing, family N member 1               |
| Pogz         | pogo transposable element with ZNF domain                              |
| Parp6        | poly (ADP-ribose) polymerase family, member 6                          |
| Pan2         | polyA specific ribonuclease subunit homolog (S. cerevisiae)            |
| Prkar2b      | protein kinase, cAMP dependent regulatory, type II beta                |
| Ptprs        | protein tyrosine phosphatase, receptor type, S                         |
| Plp2         | proteolipid protein 2                                                  |
| Rab2b        | RAB2B, member RAS oncogene family                                      |
| Trp53inp2    | transformation related protein 53 inducible nuclear protein 2          |
| Rin3         | Ras and Rab interactor 3                                               |
| Rassf5       | Ras association (RalGDS/AF-6) domain family member 5                   |
| Rasal3       | RAS protein activator like 3                                           |
| Rragc        | Ras-related GTP binding C                                              |
| Reep2        | receptor accessory protein 2                                           |
| Arhgap25     | Rho GTPase activating protein 25                                       |
| Arhgap26     | Rho GTPase activating protein 26                                       |
| 1100001G20R  | RIKEN cDNA 1100001G20 gene                                             |
| 1700020O03R  | RIKEN cDNA 1700020O03 gene                                             |
| 1700109H08R  | RIKEN cDNA 1700109H08 gene                                             |
| 2610008E11Ri | RIKEN cDNA 2610008E11 gene                                             |

|             |                                                                              |
|-------------|------------------------------------------------------------------------------|
| 2700081O15R | RIKEN cDNA 2700081O15 gene                                                   |
| 4930470P17R | RIKEN cDNA 4930470P17 gene                                                   |
| 4931406C07R | RIKEN cDNA 4931406C07 gene                                                   |
| 4933437N03R | RIKEN cDNA 4933437N03 gene                                                   |
| 5133401N09R | RIKEN cDNA 5133401N09 gene                                                   |
| 5730508B09R | RIKEN cDNA 5730508B09 gene                                                   |
| 9130008F23R | RIKEN cDNA 9130008F23 gene                                                   |
| A630001G21R | RIKEN cDNA A630001G21 gene                                                   |
| E130309D02R | RIKEN cDNA E130309D02 gene                                                   |
| Rnf114      | ring finger protein 114                                                      |
| Robo3       | roundabout homolog 3 (Drosophila)                                            |
| Runx1       | runt related transcription factor 1                                          |
| Sesn3       | sestrin 3                                                                    |
| Sik3        | SIK family kinase 3                                                          |
| Ssbp2       | single-stranded DNA binding protein 2                                        |
| Sirt5       | sirtuin 5                                                                    |
| Smg1        | SMG1 homolog, phosphatidylinositol 3-kinase-related kinase (C. elegans)      |
| Slc39a1     | solute carrier family 39 (zinc transporter), member 1                        |
| Slc9a9      | solute carrier family 9 (sodium/hydrogen exchanger), member 9                |
| Spnb2       | spectrin beta 2                                                              |
| Tagap       | T-cell activation Rho GTPase-activating protein                              |
| Tnks2       | tankyrase, TRF1-interacting ankyrin-related ADP-ribose polymerase 2          |
| Sin3a       | transcriptional regulator, SIN3A (yeast)                                     |
| Tgm2        | transglutaminase 2, C polypeptide                                            |
| Timm8a2     | translocase of inner mitochondrial membrane 8 homolog a2 (yeast)             |
| Tmcc2       | transmembrane and coiled-coil domains 2                                      |
| Tsc22d3     | TSC22 domain family, member 3                                                |
| Ube2h       | ubiquitin-conjugating enzyme E2H                                             |
| Unkl        | unkempt-like (Drosophila)                                                    |
| Usp6nl      | USP6 N-terminal like                                                         |
| Mycn        | v-myc myelocytomatosis viral related oncogene, neuroblastoma derived (avian) |
| Vamp5       | vesicle-associated membrane protein 5                                        |
| Wdr24       | WD repeat domain 24                                                          |
| Wdr26       | WD repeat domain 26                                                          |
| Ythdf2      | YTH domain family 2                                                          |
| Zbtb4       | zinc finger and BTB domain containing 4                                      |
| Zbtb48      | zinc finger and BTB domain containing 48                                     |
| Zfp161      | zinc finger protein 161                                                      |
| Zfp28       | zinc finger protein 2                                                        |
| Zfp263      | zinc finger protein 263                                                      |
| Zfp408      | zinc finger protein 408                                                      |
| Zfp598      | zinc finger protein 598                                                      |
| Zfyve9      | zinc finger, FYVE domain containing 9                                        |

**Supplementary Table S4**

Genes from the microarray overlap validation screen that were targeted by two or more depleting shRNAs. The average fold change for each shRNA *in vivo* (relative to the input cell population) was divided by the average fold change of that shRNA *in vitro* to identify hairpins that specifically depleted *in vivo*. shRNAs were rank ordered based on this value, and the bottom 30% of shRNAs were considered depleting shRNAs

| <b>Number of independent shRNAs</b> | <b>Gene symbol</b> | <b>Gene name</b>                                                        |
|-------------------------------------|--------------------|-------------------------------------------------------------------------|
| 4                                   | Chd8               | chromodomain helicase DNA binding protein 8                             |
| 4                                   | Klhl17             | kelch-like 17 (Drosophila)                                              |
| 4                                   | Lmo2               | LIM domain only 2                                                       |
| 3                                   | 1700020O03Rik      | RIKEN cDNA 1700020O03 gene                                              |
| 3                                   | 1700109H08Rik      | RIKEN cDNA 1700109H08 gene                                              |
| 3                                   | 2700081O15Rik      | RIKEN cDNA 2700081O15 gene                                              |
| 3                                   | 4931406C07Rik      | RIKEN cDNA 4931406C07 gene                                              |
| 3                                   | Acox3              | acyl-Coenzyme A oxidase 3, pristanoyl                                   |
| 3                                   | Adam19             | a disintegrin and metallopeptidase domain 19                            |
| 3                                   | Arf2               | ADP-ribosylation factor 2                                               |
| 3                                   | Baz2b              | bromodomain adjacent to zinc finger domain, 2B                          |
| 3                                   | Ctsc               | cathepsin C                                                             |
| 3                                   | Dcaf8              | DDB1 and CUL4 associated factor 8                                       |
| 3                                   | Dvl1               | dishevelled, dsh homolog 1 (Drosophila)                                 |
| 3                                   | E130309D02Rik      | RIKEN cDNA E130309D02 gene                                              |
| 3                                   | Herc3              | hect domain and RLD 3                                                   |
| 3                                   | Hmha1              | histocompatibility (minor) HA-1                                         |
| 3                                   | L3mbtl3            | l(3)mbt-like 3 (Drosophila)                                             |
| 3                                   | Ln timer           | ligand of numb-protein X 2                                              |
| 3                                   | Lrrn3              | leucine rich repeat protein 3, neuronal                                 |
| 3                                   | Ms4a6c             | membrane-spanning 4-domains, subfamily A, member 6C                     |
| 3                                   | Myh9               | myosin, heavy polypeptide 9, non-muscle                                 |
| 3                                   | Pdzd2              | PDZ domain containing 2                                                 |
| 3                                   | Plekhn1            | pleckstrin homology domain containing, family N member 1                |
| 3                                   | Reep2              | receptor accessory protein 2                                            |
| 3                                   | Rragc              | Ras-related GTP binding C                                               |
| 3                                   | Smg1               | SMG1 homolog, phosphatidylinositol 3-kinase-related kinase (C. elegans) |
| 3                                   | Tagap              | T-cell activation Rho GTPase-activating protein                         |
| 3                                   | Tmcc2              | transmembrane and coiled-coil domains 2                                 |
| 3                                   | Tnks2              | tankyrase, TRF1-interacting ankyrin-related ADP-ribose polymerase 2     |
| 3                                   | Ube2h              | ubiquitin-conjugating enzyme E2H                                        |
| 3                                   | Zbtb48             | zinc finger and BTB domain containing 48                                |
| 3                                   | Zfp161             | zinc finger protein 161                                                 |
| 3                                   | Zfp408             | zinc finger protein 408                                                 |

|   |               |                                                                                     |
|---|---------------|-------------------------------------------------------------------------------------|
| 2 | 4930470P17Rik | RIKEN cDNA 4930470P17 gene                                                          |
| 2 | Atp7a         | ATPase, Cu <sup>++</sup> transporting, alpha polypeptide                            |
| 2 | BC006779      | cDNA sequence BC006779                                                              |
| 2 | Cabin1        | calcineurin binding protein 1                                                       |
| 2 | Ccdc84        | coiled-coil domain containing 84                                                    |
| 2 | Ccr1          | chemokine (C-C motif) receptor-like 1                                               |
| 2 | Cd177         | CD177 antigen                                                                       |
| 2 | BC035295      | cysteine-serine-rich nuclear protein 2                                              |
| 2 | Ctdsp2        | CTD (carboxy-terminal domain, RNA polymerase II, polypeptide A) small phosphatase 2 |
| 2 | Diablo        | diablo homolog (Drosophila)                                                         |
| 2 | Dnajb9        | DnaJ (Hsp40) homolog, subfamily B, member 9                                         |
| 2 | H2afj         | H2A histone family, member J                                                        |
| 2 | Hps5          | Hermansky-Pudlak syndrome 5 homolog (human)                                         |
| 2 | Ikbip         | IKBKB interacting protein                                                           |
| 2 | Itpkb         | inositol 1,4,5-trisphosphate 3-kinase B                                             |
| 2 | Klhl6         | kelch-like 6 (Drosophila)                                                           |
| 2 | Morc3         | microrchidia 3                                                                      |
| 2 | Mycn          | v-myc myelocytomatosis viral related oncogene, neuroblastoma derived (avian)        |
| 2 | Nfe2l1        | nuclear factor, erythroid derived 2,-like 1                                         |
| 2 | Ostm1         | osteopetrosis associated transmembrane protein 1                                    |
| 2 | Pafah1b3      | platelet-activating factor acetylhydrolase, isoform 1b, subunit 3                   |
| 2 | Pdrg1         | p53 and DNA damage regulated 1                                                      |
| 2 | Phactr2       | phosphatase and actin regulator 2                                                   |
| 2 | Pik3r3        | phosphatidylinositol 3 kinase, regulatory subunit, polypeptide 3 (p55)              |
| 2 | Pogz          | pogo transposable element with ZNF domain                                           |
| 2 | Pon2          | paraoxonase 2                                                                       |
| 2 | A430107D22Rik | RAS protein activator like 3                                                        |
| 2 | Rassf5        | Ras association (RalGDS/AF-6) domain family member 5                                |
| 2 | Rin3          | Ras and Rab interactor 3                                                            |
| 2 | Runx1         | runt related transcription factor 1                                                 |
| 2 | Sik3          | SIK family kinase 3                                                                 |
| 2 | Sirt5         | sirtuin 5                                                                           |
| 2 | Slc39a1       | solute carrier family 39 (zinc transporter), member 1                               |
| 2 | Slc9a9        | solute carrier family 9 (sodium/hydrogen exchanger), member 9                       |
| 2 | Spnb2         | spectrin beta 2                                                                     |
| 2 | Timm8a2       | translocase of inner mitochondrial membrane 8 homolog a2 (yeast)                    |
| 2 | Trp53inp2     | transformation related protein 53 inducible nuclear protein 2                       |
| 2 | Tsc22d3       | TSC22 domain family, member 3                                                       |
| 2 | Unkl          | unkempt-like (Drosophila)                                                           |
| 2 | Vamp5         | vesicle-associated membrane protein 5                                               |
| 2 | Wdr26         | WD repeat domain 26                                                                 |
| 2 | Ythdf2        | YTH domain family 2                                                                 |
| 2 | Zfp28         | zinc finger protein 2                                                               |

**Supplementary Table S5**

The frequency of inactivating Phf6 mutations in hematopoietic cancers.

| Disease         |                                             | Number of cases examined | Number of Phf6 LOF mutations identified | % w/ Phf6 LOF mutations | Reference                            |
|-----------------|---------------------------------------------|--------------------------|-----------------------------------------|-------------------------|--------------------------------------|
| T-cell leukemia |                                             |                          |                                         |                         |                                      |
|                 | adult T-ALL                                 | 42                       | 16                                      | 38%                     | Nature Genetics 2010; PMID: 20228800 |
|                 | pediatric T-ALL                             | 89                       | 14                                      | 16%                     | Nature Genetics 2010; PMID: 20228800 |
|                 | T-ALL                                       | 23                       | 8                                       | 35%                     | Acta Oncologica 2012; PMID: 21736506 |
|                 | childhood T-ALL; early T-cell precursor     | 64                       | 16                                      | 25%                     | Nature 2012; PMID: 22237106          |
|                 | childhood T-ALL; non-early T-cell precursor | 42                       | 9                                       | 21%                     | Nature 2012; PMID: 22237106          |
| AML             |                                             |                          |                                         |                         |                                      |
|                 | AML                                         | 398                      | NA                                      | 3%                      | NEJM 2012; PMID: 22417203            |
|                 | adult AML                                   | 353                      | 10                                      | 3%                      | Leukemia 2011; PMID: 21030981        |
|                 | adult AML                                   | 105                      | 2                                       | 2%                      | Acta Oncologica 2012; PMID: 21736506 |
| B-cell leukemia |                                             |                          |                                         |                         |                                      |
|                 | B-ALL                                       | 62                       | 0                                       | 0%                      | Nature Genetics 2010; PMID: 20228800 |
|                 | pre-B ALL                                   | 66                       | 0                                       | 0%                      | Acta Oncologica 2012; PMID: 21736506 |

**Supplementary Table S6**

The target genes bound by PHF6 were classified using Ingenuity Pathway analysis for the top five results in these categories: top networks, diseases and disorders, canonical pathways, and cellular and molecular function. P-values and number of molecules for each category are shown.

**Top networks****ID Associated Network Functions**

- 1 Cell Cycle, Cell Death and Survival, Cell-To-Cell Signaling and Interaction
- 2 Cell Morphology, Cellular Assembly and Organization, Cellular Development
- 3 Cancer, Endocrine System Disorders, Hematological Disease
- 4 Cell-To-Cell Signaling and Interaction, Nervous System Development and Function, Cell Signaling
- 5 Cellular Growth and Proliferation, Hematological System Development and Function, Hematopoiesis

**Diseases and disorders**

| Name                            | p-value                       | #Molecules |
|---------------------------------|-------------------------------|------------|
| Cancer                          | $3.81E^{-22}$ - $3.12E^{-05}$ | 1577       |
| Developmental Disorder          | $4.75E^{-19}$ - $2.45E^{-05}$ | 626        |
| Connective Tissue Disorders     | $9.35E^{-18}$ - $1.13E^{-06}$ | 150        |
| Skeletal and Muscular Disorders | $9.35E^{-18}$ - $1.13E^{-06}$ | 493        |
| Infectious Disease              | $5.20E^{-15}$ - $1.12E^{-05}$ | 615        |

**Canonical pathways**

| Name                                           | p-value       | Ratio           |
|------------------------------------------------|---------------|-----------------|
| Molecular Mechanisms of Cancer                 | $4.56E^{-24}$ | 161/378 (0.426) |
| Axonal Guidance Signaling                      | $2.46E^{-15}$ | 169/468 (0.361) |
| WnV~catenin Signaling                          | $2.50E^{-11}$ | 78/174 (0.448)  |
| Ephrin Receptor Signaling                      | $2.04E^{-10}$ | 77/201 (0.383)  |
| Factors Promoting Cardiogenesis in Vertebrates | $2.65E^{-10}$ | 47/94 (0.5)     |

**Molecular and cellular function**

| Name                              | p-value                       | #Molecules |
|-----------------------------------|-------------------------------|------------|
| Gene Expression                   | $1.68E^{-60}$ - $1.78E^{-09}$ | 1008       |
| Cellular Growth and Proliferation | $1.11E^{-36}$ - $2.97E^{-05}$ | 1299       |
| Cellular Development              | $1.06E^{-32}$ - $2.97E^{-05}$ | 1278       |
| Cell Death and Survival           | $4.47E^{-30}$ - $2.74E^{-05}$ | 1268       |
| Cell Cycle                        | $4.63E^{-25}$ - $2.67E^{-05}$ | 632        |



| <b>Supplemental Table S7</b>                                                           |
|----------------------------------------------------------------------------------------|
| Primers used to amplify half-hairpins and index samples for high throughput sequencing |
| <b>Primer sequences for genome-scale screen</b>                                        |
| 5' unmutated primer                                                                    |
| TAGTGAAGCCACAGATGTA                                                                    |
| 5' primers with 1 basepair mutation (used to mark individual samples)                  |
| TAGTGACGCCACAGATGTA                                                                    |
| TAGTGAAGCCACCGATGTA                                                                    |
| TAGTGAGGCCACAGATGTA                                                                    |
| TAGTGAAGCCACGGATGTA                                                                    |
| TAGTGAAGCCCCAGATGTA                                                                    |
| TAGTGAAGCCGCAGATGTA                                                                    |
| TAGTGAAGCCACAGCTGTA                                                                    |
| TAGTGAAGCCACAGGTGTA                                                                    |
| TAGGGAAGCCACAGATGTA                                                                    |
| 3' primer                                                                              |
| GTGATTTAATTTATACCATT                                                                   |
| <b>Primer sequences for validation screen</b>                                          |
| 5' unmutated primer                                                                    |
| NNNNNTAGTGAAGCCACAGATGTA                                                               |
| 5' primers with 1 basepair mutation (used to mark individual samples)                  |
| NNNNNTAGTGACGCCACAGATGTA                                                               |
| NNNNNTAGTGAAGCCACCGATGTA                                                               |
| NNNNNTAGTGAGGCCACAGATGTA                                                               |
| NNNNNTAGTGAAGCCACGGATGTA                                                               |
| NNNNNTAGTGAAGCCCCAGATGTA                                                               |
| NNNNNTAGTGAAGCCGCAGATGTA                                                               |
| NNNNNTAGTGAAGCCACAGCTGTA                                                               |
| NNNNNTAGTGAAGCCACAGGTGTA                                                               |
| NNNNNTAGGGAAGCCACAGATGTA                                                               |
| NNNNNTAGCGAAGCCACAGATGTA                                                               |
| NNNNNTAGTGAAGACACAGATGTA                                                               |
| 3' unmutated primer                                                                    |

|                                                                       |
|-----------------------------------------------------------------------|
| NNNNTTGAATTCCGAGGCAGTAGG                                              |
|                                                                       |
| 3' primers with 1 basepair mutation (used to mark individual samples) |
|                                                                       |
| NNNNTTGCATTCCGAGGCAGTAGG                                              |
| NNNNTTGGATTCCGAGGCAGTAGG                                              |
| NNNNTTGACTTCCGAGGCAGTAGG                                              |
| NNNNTTGAGTTCCGAGGCAGTAGG                                              |
| NNNNTTGAATTCCGAGGCCGTAGG                                              |
| NNNNTTGAATTCCGAGGCCGTAGG                                              |
| NNNNTTGAATTCCGCGGCAGTAGG                                              |
| NNNNTTGAACTCCGAGGCAGTAGG                                              |
| NNNNTTGAAGTCCGAGGCAGTAGG                                              |
| NNNNTTGAATCCCGAGGCAGTAGG                                              |
| NNNNTTGAATGCCGAGGCAGTAGG                                              |

**Supplementary Table S8****qPCR primer sequences**

| <b>shRNA ID</b> | <b>5' qPCR primer</b> | <b>3' qPCR primer</b> |
|-----------------|-----------------------|-----------------------|
| sh2700081O15Rik | AGCTCCCTAGGGCTCAGTG   | GAGGTCATCGTCTGGTGAGG  |
| shChd8          | TATGGTTCCCAGTGGTGGAT  | CCATGCTTAAAAACGCCAAT  |
| shDgcr2         | TACCGGGTCTACCTCAGTGG  | AGCTCCTGGTCAGTGGAGAA  |
| shDpy30         | TACAGGGACTTGCTGTGCTT  | ATCTTCAAACCTGCGCCTTGT |
| shItpkb         | ACTGGAGCGCTTTGGAACATA | CTCCATGAGGGCAGAATCAT  |
| shItn2          | GCAGCTGGAGTTGGAGAAAC  | TTTTGCTGCCTCTCGTCTTT  |
| shKlhl26        | CGAGGACTTCCTGAAAGCTG  | ACTCACGCAGTGATGTCAGG  |
| shLmo2          | GGCGCCTCTACTACAAGCTG  | GCTTGTACAGGATGCACAG   |
| shMorc3         | TCAGACAACCGGAAATCCTC  | CACAGGGGAGAAGCTCTGAC  |
| shMpzi3         | CGAGGCTATGTGGGAGAGAA  | AGGGCGGTATGTCCAGTCTA  |
| shOsr1          | TTCGTTTGCAAGTTCTGTGG  | CACAGGTGTAAGGTCGCTCA  |
| shPhf6          | GGGGAGGAAGAAAATGAAGC  | GTGAGCTGAACAGTGCCAGA  |
| shPogz          | CCTGTGGCCTCACAACTAT   | GTTCAGCACAAATCCCAACCT |
| shRassf5        | CAGACAAGCGGACTTCCTTC  | CCCCTGGATGACCTCACTAA  |
| shRunx1         | CCAGCCTCTCTGCAGAACTT  | GACGGCAGAGTAGGGAACCTG |
| shSik3          | GCTCAAGCACACTGACCAAA  | CTGACTCACAGTTCCCAGCA  |
| shSox11         | CATGTTCCGACCTGAGCTTG  | GTCCTTATCCACCAGCGACA  |
| shWdr26         | AGGTCAGCGTGGTCAGTTCT  | CACAGTCTTCCCGTCACTCA  |
| shZfp28         | GGGACTTTGTGCTTCTCAGC  | TGCTGGCCTTTTCTCATCTT  |
| shZfp516        | CATGCCGTCTGTGTCCATAC  | GCTGGCATCTTTAGGTGAG   |
| shZfp84         | CACCCATTGCTCTGAGTGAA  | GGAATTCGCACCTGTTGAGT  |

| <b>Supplementary Table S9</b>                              |                                                                            |
|------------------------------------------------------------|----------------------------------------------------------------------------|
| <b>shRNA-mediated gene knockdown (measured by RT-qPCR)</b> |                                                                            |
| <b>hairpin ID</b>                                          | <b>fraction mRNA remaining (relative to vector control infected cells)</b> |
| sh2700081O15Rik                                            | 0.33                                                                       |
| shCcr1                                                     | N.C.                                                                       |
| shChd8                                                     | 0.67                                                                       |
| shDgcr2                                                    | 0.49                                                                       |
| shDgcr2_B                                                  | 0.17                                                                       |
| shDgcr2_C                                                  | 0.35                                                                       |
| shDpy30                                                    | 0.16                                                                       |
| shItpkb                                                    | 0.42                                                                       |
| shItn2                                                     | 0.13                                                                       |
| shKlhdc9                                                   | N.C.                                                                       |
| shKlhl26                                                   | 0.36                                                                       |
| shKlhl26_B                                                 | N.C.                                                                       |
| shKlhl26_C                                                 | 0.59                                                                       |
| shLmo2_A                                                   | 0.22                                                                       |
| shLmo2_B                                                   | 0.28                                                                       |
| shLmo2_C                                                   | 0.24                                                                       |
| shLmo2_D                                                   | 0.27                                                                       |
| shMorc3                                                    | 0.72                                                                       |
| shMpzl3                                                    | 0.62                                                                       |
| shMpzl3_B                                                  | 0.66                                                                       |
| shMpzl3_C                                                  | 0.24                                                                       |
| shOsr1                                                     | 0.46                                                                       |
| shPhf6_A                                                   | 0.13                                                                       |
| shPhf6_B                                                   | 0.2                                                                        |
| shPhf6_C                                                   | 0.46                                                                       |
| shPogZ                                                     | 0.64                                                                       |
| shRassf5                                                   | 0.12                                                                       |
| shRunx1_A                                                  | 0.66                                                                       |
| shRunx1_B                                                  | 0.57                                                                       |
| shRunx1_C                                                  | 0.52                                                                       |
| shRunx1_D                                                  | 0.76                                                                       |
| shSik3                                                     | 0.71                                                                       |
| shSik3_B                                                   | 0.32                                                                       |
| shSik3_C                                                   | 0.45                                                                       |
| shSik3_C                                                   | 0.15                                                                       |
| shSlitrk4                                                  | N.C.                                                                       |
| shSlitrk4_B                                                | N.C.                                                                       |
| shSlitrk4_C                                                | N.C.                                                                       |
| shSox11                                                    | 0.74                                                                       |
| shVamp5                                                    | N.C.                                                                       |
| shWdr26                                                    | 0.28                                                                       |
| shZfp161                                                   | N.C.                                                                       |
| shZfp28                                                    | 0.58                                                                       |

|           |      |
|-----------|------|
| shZfp28_B | N.C. |
| shZfp516  | 0.53 |
| shZfp84   | 0.45 |
| shZfp84_B | 0.17 |

N.C. = knockdown not confirmed
